# Supplementary material for: Photoinduced 1,5-HAT-enabled 1,7-hydrosulfonylation of allylic ethers and amides
Source: Royal Society of Chemistry journal article supplement (doi:10.1039/d4cc03557g), 2024-01-01

## *Supporting Information*

### *Photoinduced 1,5-HAT-enabled 1,7-hydrosulfonylation of allylic ethers and amides*

Ke-Yi Deng,<sup>a</sup> Zhen-Zhen Xie,<sup>a</sup> Chu-Ping Yuan,<sup>a</sup> Jian-Ping Guan,<sup>a</sup> Kai Chen,<sup>a</sup> Hao-Yue Xiang,<sup>a,\*</sup> Hua Yang<sup>a,\*</sup>

<sup>†</sup>College of Chemistry and Chemical Engineering, Central South University, Changsha 410083, P. R. China

\* Hua Yang, E-mail: [hyangchem@csu.edu.cn](mailto:hyangchem@csu.edu.cn)

\* Haoyue Xiang, E-mail: [xianghaoyue@csu.edu.cn](mailto:xianghaoyue@csu.edu.cn)

#### **Table of contents**

|                                                                                                                      |    |
|----------------------------------------------------------------------------------------------------------------------|----|
| 1. General Experimental Methods .....                                                                                | 1  |
| 2. Optimization of Reaction Conditions .....                                                                         | 2  |
| 3. General Procedures for the Synthesis of Compounds <b>1a-1e</b> and <b>14</b> .....                                | 8  |
| 3.1 General Procedure for the Preparation of Compounds <b>1a-1e</b> .....                                            | 8  |
| 3.2 General Procedure for the Preparation of Compound <b>14</b> .....                                                | 8  |
| 4. General Procedure for the Preparation of Products <b>3-13</b> and <b>15-24</b> .....                              | 9  |
| 4.1 General Procedure for the Preparation of Compounds <b>3-13</b> .....                                             | 9  |
| 4.2 General Procedure for the Preparation of Compounds <b>15-24</b> .....                                            | 9  |
| 4.3 Scale-up Reaction.....                                                                                           | 10 |
| 4.4 Derivatization .....                                                                                             | 10 |
| 5. Mechanistic Studies .....                                                                                         | 10 |
| 6. Copies of NMR Spectra.....                                                                                        | 12 |
| 7. NMR Spectra of Compounds of <b>1d-1e</b> , <b>14a</b> , <b>14c</b> , <b>3-13</b> , <b>15-24</b> , <b>3'</b> ..... | 23 |

## 1. General Experimental Methods

Unless otherwise noted, all solvents and reagents were purchased from commercial suppliers and used without further purification.  $^1\text{H}$  NMR spectra were recorded at 400 MHz. The chemical shifts were recorded in *ppm* relative to tetramethylsilane and with the solvent resonance as the internal standard. Data were reported as follows: chemical shift, multiplicity (*s* = singlet; *d* = doublet; *dd* = doublet of doublet; *t* = triplet; *q* = quartet; *br s* = broad singlet; *m* = multiplet), coupling constants (Hz), integration.  $^{19}\text{F}$  NMR data were collected at 376 MHz with complete proton decoupling.  $^{13}\text{C}$  NMR data were collected at 100 MHz with complete proton decoupling. Infrared spectra (IR) were measured by FT-IR apparatus. High resolution mass spectroscopy (HRMS) was recorded on TOF MS  $\text{ES}^+$  Mass spectrometer and acetonitrile was used to dissolve the sample. Column chromatography was carried out on silica gel (200-300 mesh, Petroleum PE/EtOAc solvent systems). Melting points (m.p.) were measured by Büchi 510 melting point apparatus and uncorrected.

## 2. Optimization of Reaction Conditions

### 1) Screening of Solvents<sup>a</sup>

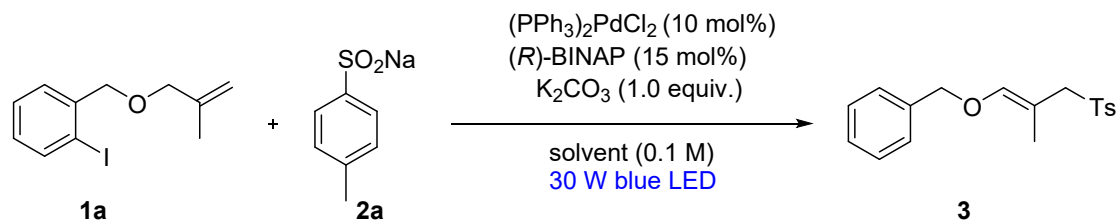

| Entry | Pd-catalyst                                        | Ligand    | Base                           | Solvent | Yield (%) <sup>b</sup> |
|-------|----------------------------------------------------|-----------|--------------------------------|---------|------------------------|
| 1     | (PPh <sub>3</sub> ) <sub>2</sub> PdCl <sub>2</sub> | (R)-BINAP | K <sub>2</sub> CO <sub>3</sub> | MeCN    | 16                     |
| 2     | (PPh <sub>3</sub> ) <sub>2</sub> PdCl <sub>2</sub> | (R)-BINAP | K <sub>2</sub> CO <sub>3</sub> | Toluene | trace                  |
| 3     | (PPh <sub>3</sub> ) <sub>2</sub> PdCl <sub>2</sub> | (R)-BINAP | K <sub>2</sub> CO <sub>3</sub> | DMF     | trace                  |
| 4     | (PPh <sub>3</sub> ) <sub>2</sub> PdCl <sub>2</sub> | (R)-BINAP | K <sub>2</sub> CO <sub>3</sub> | Acetone | trace                  |
| 5     | (PPh <sub>3</sub> ) <sub>2</sub> PdCl <sub>2</sub> | (R)-BINAP | K <sub>2</sub> CO <sub>3</sub> | DMSO    | trace                  |
| 6     | (PPh <sub>3</sub> ) <sub>2</sub> PdCl <sub>2</sub> | (R)-BINAP | K <sub>2</sub> CO <sub>3</sub> | THF     | 27                     |
| 7     | (PPh <sub>3</sub> ) <sub>2</sub> PdCl <sub>2</sub> | (R)-BINAP | K <sub>2</sub> CO <sub>3</sub> | EtOAc   | trace                  |
| 8     | (PPh <sub>3</sub> ) <sub>2</sub> PdCl <sub>2</sub> | (R)-BINAP | K <sub>2</sub> CO <sub>3</sub> | DCM     | n. d.                  |
| 9     | (PPh <sub>3</sub> ) <sub>2</sub> PdCl <sub>2</sub> | (R)-BINAP | K <sub>2</sub> CO <sub>3</sub> | DMA     | 40                     |

<sup>a</sup>Unless otherwise noted, all reactions were carried out using **1a** (0.2 mmol, 1.0 equiv.), **2a** (0.4 mmol, 2.0 equiv.), K<sub>2</sub>CO<sub>3</sub> (0.2 mmol, 1.0 equiv.), (PPh<sub>3</sub>)<sub>2</sub>PdCl<sub>2</sub> (10 mol%), (R)-BINAP (15 mol%), solvent (2.0 mL) at ambient temperature, under Ar atmosphere for 24 h, 30 W blue LEDs; <sup>b</sup>Yield of the isolated product.

## 2) Screening of Bases<sup>a</sup>

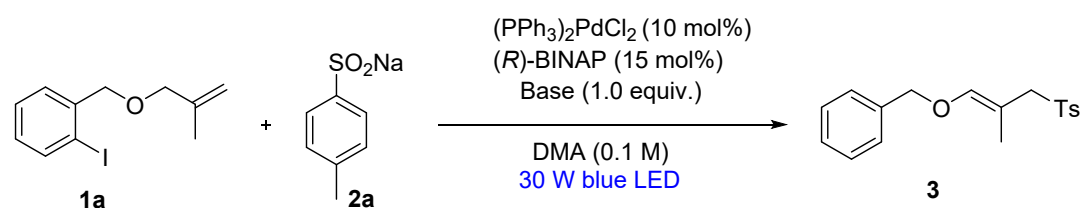

| Entry           | Pd-catalyst                                       | Ligand                                    | Base                             | Solvent    | Yield (%) <sup>b</sup> |
|-----------------|---------------------------------------------------|-------------------------------------------|----------------------------------|------------|------------------------|
| 1               | $(\text{PPh}_3)_2\text{PdCl}_2$                   | $(R)$ -BINAP                              | $\text{K}_2\text{CO}_3$          | DMA        | 40                     |
| 2               | $(\text{PPh}_3)_2\text{PdCl}_2$                   | $(R)$ -BINAP                              | $\text{CsCO}_3$                  | DMA        | 16                     |
| 3               | $(\text{PPh}_3)_2\text{PdCl}_2$                   | $(R)$ -BINAP                              | $\text{KHCO}_3$                  | DMA        | 40                     |
| 4               | $(\text{PPh}_3)_2\text{PdCl}_2$                   | $(R)$ -BINAP                              | $\text{AcONa}$                   | DMA        | 32                     |
| 5               | $(\text{PPh}_3)_2\text{PdCl}_2$                   | $(R)$ -BINAP                              | DBU                              | DMA        | 11                     |
| 6               | $(\text{PPh}_3)_2\text{PdCl}_2$                   | $(R)$ -BINAP                              | TBAI                             | DMA        | 39                     |
| 7               | $(\text{PPh}_3)_2\text{PdCl}_2$                   | $(R)$ -BINAP                              | NaOH                             | DMA        | trace                  |
| 8               | $(\text{PPh}_3)_2\text{PdCl}_2$                   | $(R)$ -BINAP                              | $\text{K}_2\text{S}_2\text{O}_5$ | DMA        | 26                     |
| 9               | $(\text{PPh}_3)_2\text{PdCl}_2$                   | $(R)$ -BINAP                              | $\text{NaH}_2\text{PO}_4$        | DMA        | 40                     |
| <b>10</b>       | <b><math>(\text{PPh}_3)_2\text{PdCl}_2</math></b> | <b><math>(R)</math>-BINAP</b>             | <b>KF</b>                        | <b>DMA</b> | <b>62</b>              |
| 11 <sup>c</sup> | -                                                 | -                                         | KF                               | DMA        | trace                  |
| 12 <sup>d</sup> | $(\text{PPh}_3)_2\text{PdCl}_2$                   | $(R)$ -BINAP                              | -                                | DMA        | 49                     |
| 13 <sup>e</sup> | $(\text{PPh}_3)_2\text{PdCl}_2$                   | $(R)$ -BINAP                              | KF                               | DMA        | trace                  |
| 14 <sup>f</sup> | $(\text{PPh}_3)_2\text{PdCl}_2$                   | $(R)$ -BINAP                              | KF                               | DMA        | trace                  |
| 15 <sup>g</sup> | $(\text{PPh}_3)_2\text{PdCl}_2$                   | $(R)$ -BINAP                              | KF                               | DMA        | 29                     |
| 16              | $(\text{PPh}_3)_2\text{PdCl}_2$                   | <i>rac</i> -BINAP                         | KF                               | DMA        | 39                     |
| 17              | $(\text{PPh}_3)_2\text{PdCl}_2$                   | <i>rac</i> -BINAP <sup>h</sup>            | KF                               | DMA        | 37                     |
| 18              | $(\text{PPh}_3)_2\text{PdCl}_2$                   | <i>rac</i> -BINAP <sup>i</sup>            | KF                               | DMA        | 40                     |
| 19              | $(\text{PPh}_3)_2\text{PdCl}_2$                   | $(S)$ -BINAP <sup>i</sup>                 | KF                               | DMA        | 59                     |
| 20              | $(\text{PPh}_3)_2\text{PdCl}_2$                   | 20 mol%<br><i>rac</i> -BINAP <sup>i</sup> | KF                               | DMA        | 38                     |
| 21              | $(\text{PPh}_3)_2\text{PdCl}_2$                   | 30 mol%<br><i>rac</i> -BINAP <sup>i</sup> | KF                               | DMA        | 40                     |
| 22              | $(\text{PPh}_3)_2\text{PdCl}_2$                   | <i>rac</i> -BINAP <sup>j</sup>            | KF                               | DMA        | 46                     |



# <sup>1</sup>H NMR (400MHz, CDCl<sub>3</sub>) spectrum of *R*-BINAP

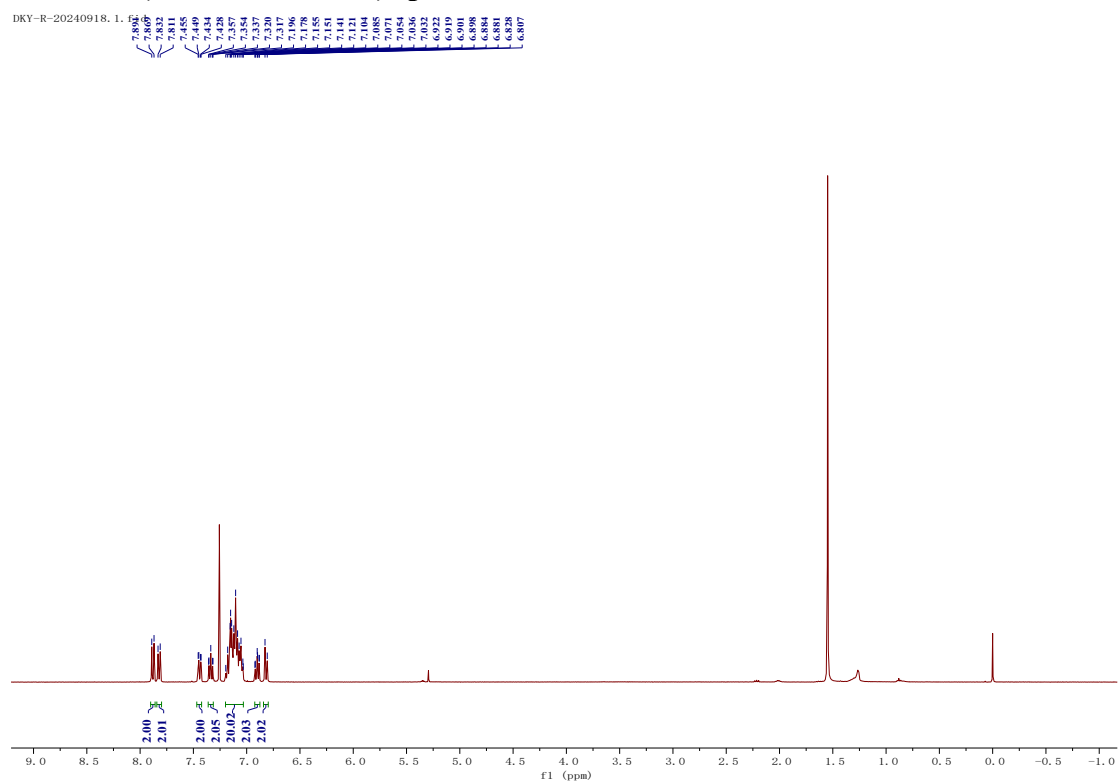

# <sup>31</sup>P NMR (162MHz, CDCl<sub>3</sub>) spectrum of *R*-BINAP

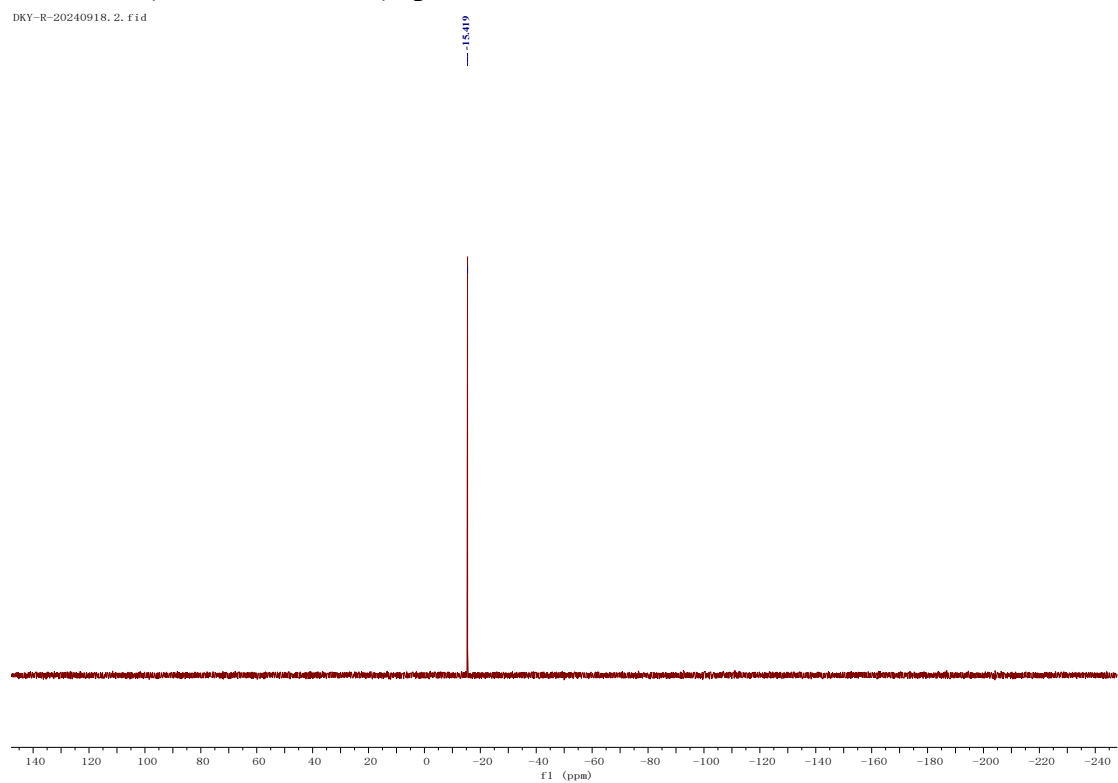

### 3) Screening of Pd-catalysts<sup>a</sup>

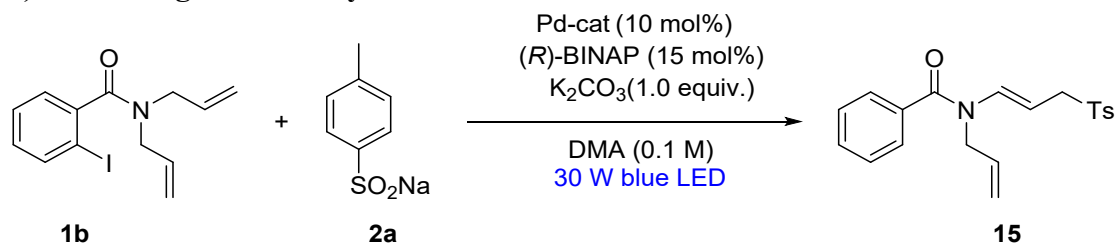

| Entry | Pd-catalyst                                                        | Ligand             | Base                           | Yield (%) <sup>b</sup> |
|-------|--------------------------------------------------------------------|--------------------|--------------------------------|------------------------|
| 1     | Pd(dba) <sub>2</sub>                                               | ( <i>R</i> )-BINAP | K <sub>2</sub> CO <sub>3</sub> | <10                    |
| 2     | PdCl <sub>2</sub>                                                  | ( <i>R</i> )-BINAP | K <sub>2</sub> CO <sub>3</sub> | 23                     |
| 3     | (PPh <sub>3</sub> ) <sub>2</sub> PdCl <sub>2</sub>                 | ( <i>R</i> )-BINAP | K <sub>2</sub> CO <sub>3</sub> | 61                     |
| 4     | Pd(CN-CH <sub>3</sub> ) <sub>2</sub> Cl <sub>2</sub>               | ( <i>R</i> )-BINAP | K <sub>2</sub> CO <sub>3</sub> | <i>trace</i>           |
| 5     | (PdCl η <sup>3</sup> -C <sub>3</sub> H <sub>5</sub> ) <sub>2</sub> | ( <i>R</i> )-BINAP | K <sub>2</sub> CO <sub>3</sub> | 16                     |
| 6     | Pd(PPh <sub>3</sub> ) <sub>4</sub>                                 | ( <i>R</i> )-BINAP | K <sub>2</sub> CO <sub>3</sub> | 48                     |

<sup>a</sup>Unless otherwise noted, all reactions were carried out using **1b** (0.2 mmol, 1.0 equiv.), **2a** (0.4 mmol, 2.0 equiv.), K<sub>2</sub>CO<sub>3</sub> (0.2 mmol, 1.0 equiv.), Pd-cat (10 mol%), (*R*)-BINAP (15 mol%), DMA (2.0 mL) at ambient temperature, under Ar atmosphere for 24 h, 30 W blue LEDs; <sup>b</sup>Yield of the isolated product.

#### 4) Screening of Ligands<sup>a</sup>

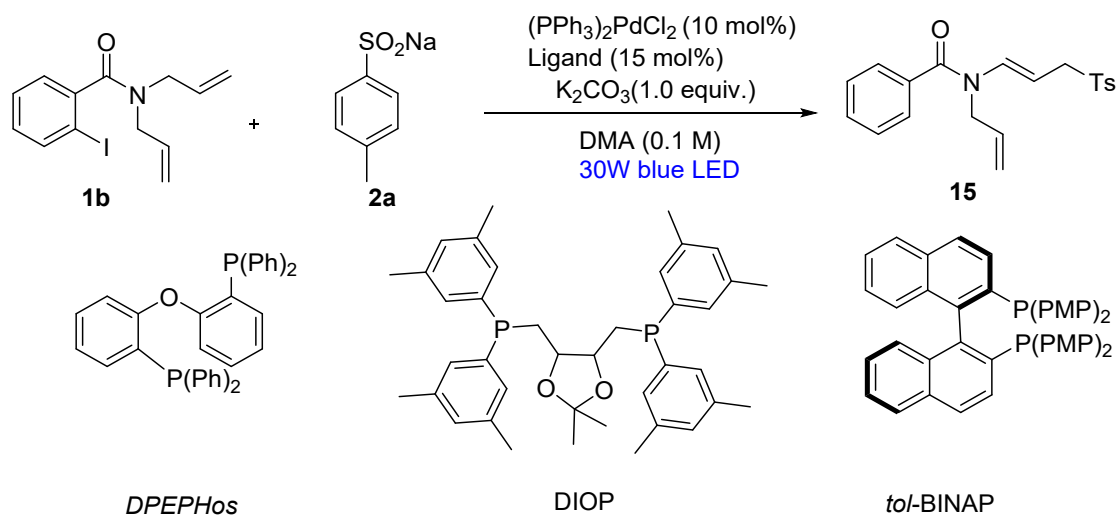

| Entry          | Pd-catalyst                                        | Ligand             | Base                           | Yield(%) <sup>b</sup> |
|----------------|----------------------------------------------------|--------------------|--------------------------------|-----------------------|
| 1              | (PPh <sub>3</sub> ) <sub>2</sub> PdCl <sub>2</sub> | <i>DPEPHos</i>     | K <sub>2</sub> CO <sub>3</sub> | <i>trace</i>          |
| 2              | (PPh <sub>3</sub> ) <sub>2</sub> PdCl <sub>2</sub> | DIOP               | K <sub>2</sub> CO <sub>3</sub> | <i>trace</i>          |
| 3              | (PPh <sub>3</sub> ) <sub>2</sub> PdCl <sub>2</sub> | <i>tol</i> -BINAP  | K <sub>2</sub> CO <sub>3</sub> | <i>trace</i>          |
| 4              | (PPh <sub>3</sub> ) <sub>2</sub> PdCl <sub>2</sub> | ( <i>R</i> )-BINAP | K <sub>2</sub> CO <sub>3</sub> | 61                    |
| 5              | (PPh <sub>3</sub> ) <sub>2</sub> PdCl <sub>2</sub> | ( <i>R</i> )-BINAP | KF                             | 32                    |
| 6 <sup>c</sup> | (PPh <sub>3</sub> ) <sub>2</sub> PdCl <sub>2</sub> | ( <i>R</i> )-BINAP | K <sub>2</sub> CO <sub>3</sub> | 15                    |

<sup>a</sup>Unless otherwise noted, all reactions were carried out using **1b** (0.2 mmol, 1.0 equiv.), **2a** (0.4 mmol, 2.0 equiv.), K<sub>2</sub>CO<sub>3</sub> (0.2 mmol, 1.0 equiv.), (PPh<sub>3</sub>)<sub>2</sub>PdCl<sub>2</sub> (10 mol%), Ligand (15 mol%), DMA (2.0 mL) at ambient temperature, under Ar atmosphere for 24 h, 30 W blue LEDs; <sup>b</sup>Yield of the isolated product; <sup>c</sup>**1b** (0.2 mmol, 1.0 equiv.), **2a** (0.6 mmol, 3.0 equiv.).



### 3. General Procedures for the Synthesis of Compounds 1a-1e and 14

#### 3.1 General Procedure for the Preparation of Compounds 1a-1e

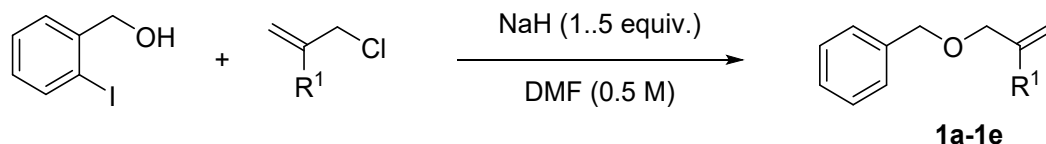

To a two-necked flask equipped with a magnetic stirring bar, substituted or unsubstituted allyl chloride (5.0 mmol, 1.0 equiv.) and DMF (anhydrous, 0.5 M) were added under an Ar atmosphere. Then, the solution was cooled to 0 °C and NaH (7.5 mmol, 1.5 equiv. ) stored in coal oil was added. After stirring for 30 minutes at room temperature, 2-iodobenzylalcohol (7.5 mmol, 1.5 equiv.) was added dropwise, and the mixture was stirred at room temperature overnight. Thereafter, the reaction was quenched with sat. aq. NH<sub>4</sub>Cl and extracted with EtOAc. The combined organic phase was dried over MgSO<sub>4</sub> and evaporated under reduced pressure. Purification of the residue by column chromatography (PE/EA = 100/1) afforded the desired benzyl ether.

#### 3.2 General Procedure for the Preparation of Compound 14

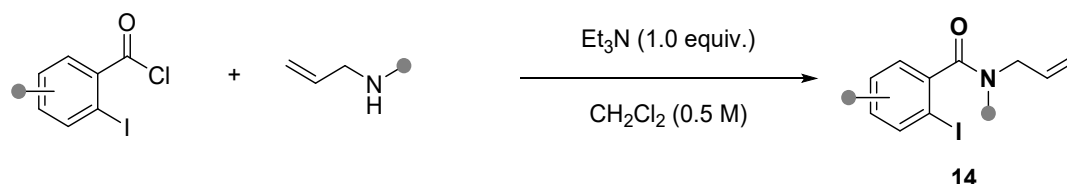

To a two-necked flask equipped with a magnetic stirring bar, substituted or unsubstituted allylamine (5.0 mmol, 1.0 equiv.) and CH<sub>2</sub>Cl<sub>2</sub> (0.5 M) were added under an Ar atmosphere. Then, the solution was cooled to 0 °C and Et<sub>3</sub>N (2.1 mL, 1.5 equiv.) stored in coal oil was added. After stirring for 30 minutes at room temperature, 2-iodobenzoyl chloride (5.5 mmol, 1.1 equiv.) was added dropwise, and the mixture was stirred at room temperature overnight. Thereafter, the reaction was quenched with sat. aq. NH<sub>4</sub>Cl and extracted with EtOAc. The combined organic phase was dried over MgSO<sub>4</sub> and evaporated under reduced pressure. Purification of the residue by column chromatography (PE/EA = 19:1) afforded the desired *N*-allyl-acylamide.

## 4. General Procedure for the Preparation of Products 3-13 and 15-24

### 4.1 General Procedure for the Preparation of Compounds 3-13

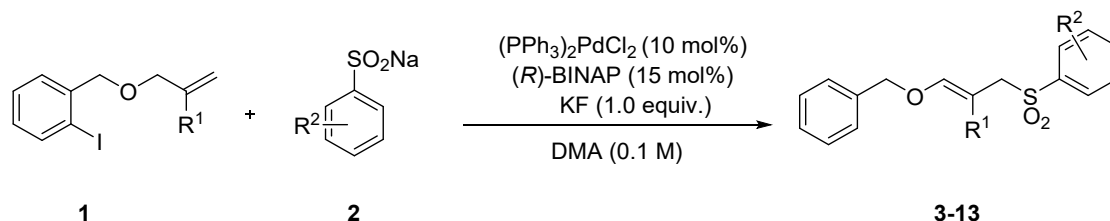

To a reaction tube equipped with a magnetic stirring bar, compound **1** (0.2 mmol, 1.0 equiv.), compound **2** (0.4 mmol, 2.0 equiv.), (PPh<sub>3</sub>)<sub>2</sub>PdCl<sub>2</sub> (10 mol%), (R)-BINAP (15 mol%), KF (0.2 mmol, 1.0 equiv.) and DMA (0.1 M) were added. The resulting mixture was charged with argon, then stirred and irradiated by a 30 W blue LED at ambient temperature for 24 h. Thereafter, the reaction was quenched with sat. aq. NaCl and extracted with EtOAc, removed under reduced pressure and then purified by column chromatography to afford the desired products **3-13**.

### 4.2 General Procedure for the Preparation of Compounds 15-24

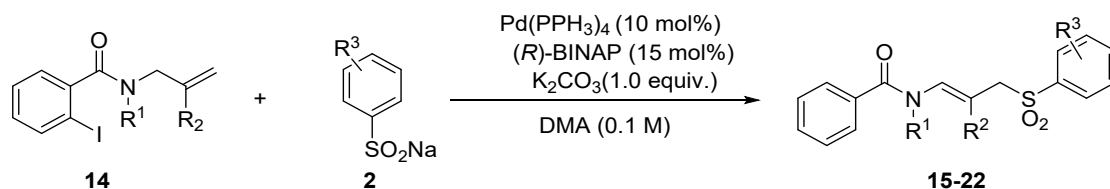

To a reaction tube equipped with a magnetic stirring bar, compound **14** (0.2 mmol, 1.0 equiv.), compound **2** (0.4 mmol, 2.0 equiv.), Pd(PPh<sub>3</sub>)<sub>4</sub> (10 mol%), (R)-BINAP (15 mol%), K<sub>2</sub>CO<sub>3</sub> (0.2 mmol, 1.0 equiv.) and DMA (0.1 M) were added. The resulting mixture was charged with argon, then stirred and irradiated by a 30 W blue LED at ambient temperature for 24 h. Thereafter, the reaction was quenched with sat. aq. NaCl and extracted with EtOAc, and removed under reduced pressure and then purified by column chromatography to afford the desired products **15-24**.

### 4.3 Scale-up Reaction

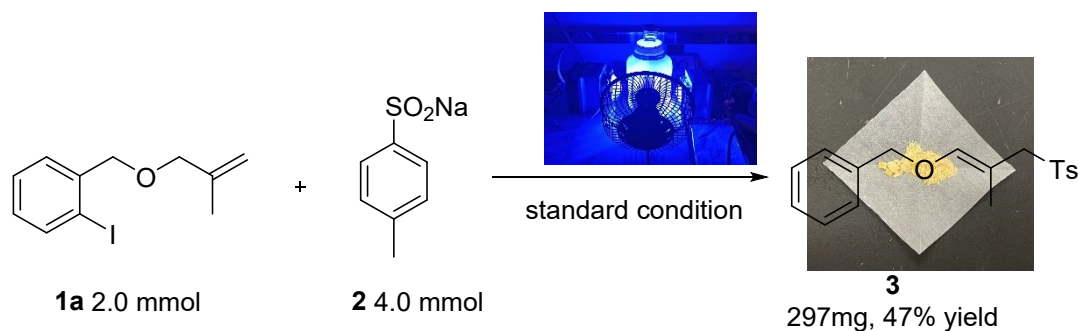

### 4.4 Derivatization

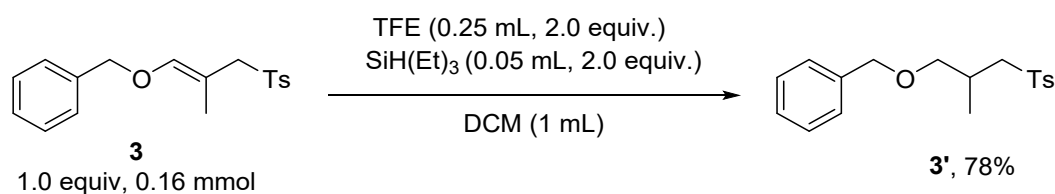

## 5. Mechanistic Studies

### 5.1 Trapping Experiment

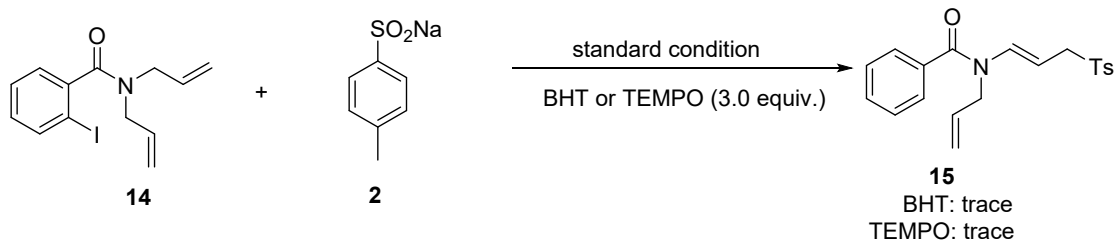

Radical trapping experiments between **14** and **2** were conducted under standard conditions with two trapping agents (BHT or TEMPO) to determine the putative radical. The desired product **15** was obtained trace when BHT or TEMPO was added. The corresponding coupled product between BHT/TEMPO radical and the allyl amine mixture was successfully detected by HRMS (Figure S1). HRMS (EI): C<sub>28</sub>H<sub>37</sub>NNaO<sub>2</sub><sup>+</sup>, [M+Na]<sup>+</sup> calcd: 442.2717, found: 442.2710 (BHT-adduct); HRMS (EI): C<sub>22</sub>H<sub>33</sub>N<sub>2</sub>O<sub>2</sub><sup>+</sup>, [M+Na]<sup>+</sup> calcd: 357.2537, found: 357.2534 (TEMPO-adduct).

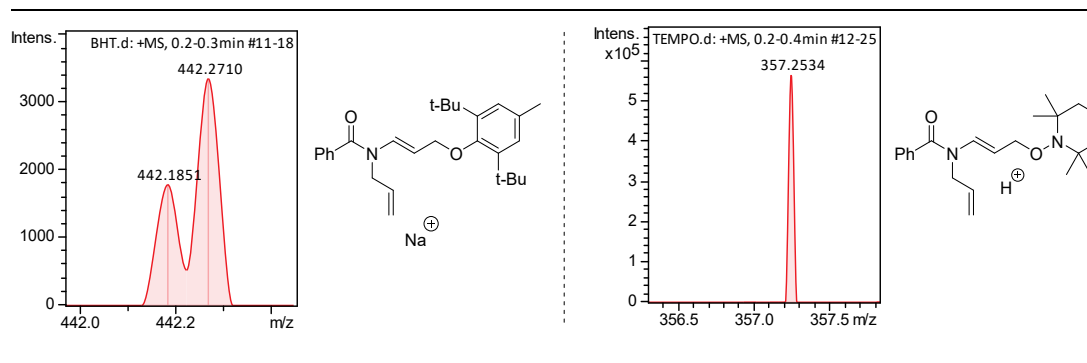

**Figure S1.** Crude ESI-MS of the radical-trapping experiments

## 5.2 UV/Vis Absorption Spectrometry

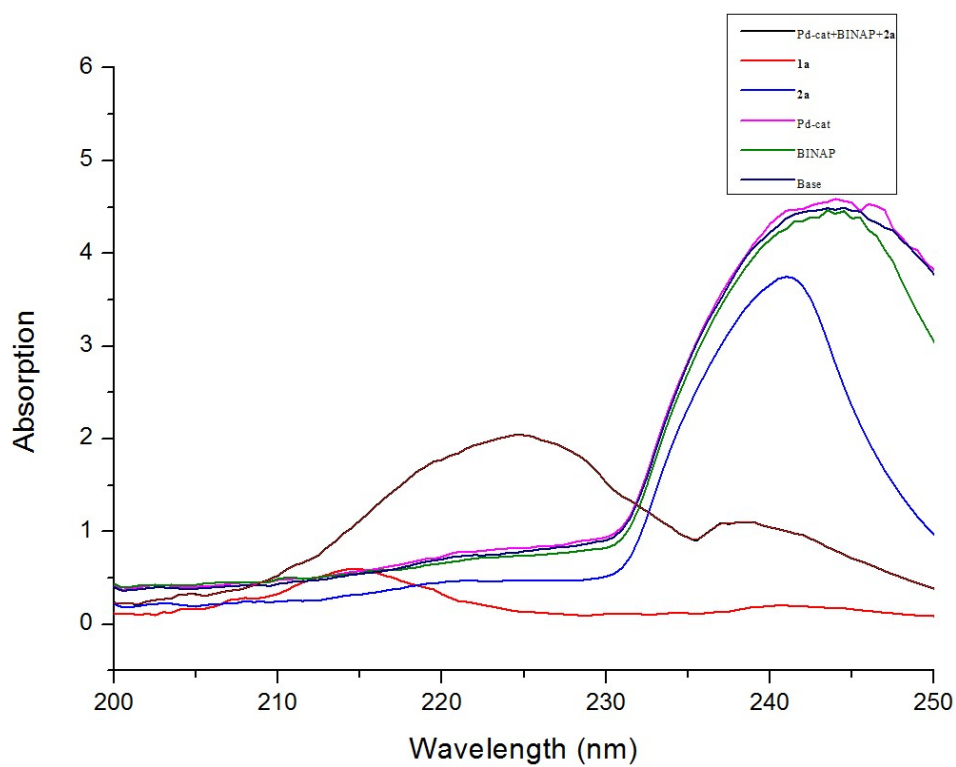

**Figure S2.** UV/Vis absorption spectra of **1a**, **2a**, base, Pd-cat and BINAP

## 6. Copies of NMR Spectra

Raw material **1d** (colorless oil)

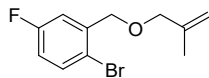

**IR** (neat)  $\nu$  1283, 1158, 1097, 1026, 989, 766, 721, 624  $\text{cm}^{-1}$ ;

**$^1\text{H}$  NMR** (400 MHz, Chloroform-*d*)  $\delta$  7.79 (s, 1H), 7.67 (d,  $J = 8.1$  Hz, 1H), 7.58 (d,  $J = 8.0$  Hz, 1H), 5.05 (s, 1H), 4.97 (s, 1H), 4.57 (s, 2H), 4.04 (s, 2H), 1.80 (s, 3H);

**$^{19}\text{F}\{^1\text{H}\}$  NMR** (376 MHz, Chloroform-*d*)  $\delta$  -62.59;

**$^{13}\text{C}\{^1\text{H}\}$  NMR** (100 MHz, Chloroform-*d*)  $\delta$  162.2 (d,  $^1J_{\text{C-F}} = 246.4$  Hz), 141.7, 140.3 (d,  $^2J_{\text{C-F}} = 7.5$  Hz), 133.5 (d,  $^2J_{\text{C-F}} = 8.0$  Hz), 115.8 (d,  $^3J_{\text{C-F}} = 1.7$  Hz), 115.5, 112.6, 74.9, 70.7, 19.6;

**HRMS** (ESI)  $m/z$ :  $[\text{M}+\text{H}]^+$  Calcd for:  $\text{C}_{11}\text{H}_{13}\text{BrFO}^+$  259.0128; Found:259.0122.

Raw material **1e** (pale yellow oil)

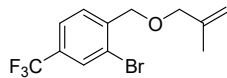

**IR** (neat)  $\nu$  1323, 1156, 1149, 1068, 975, 766, 703, 641  $\text{cm}^{-1}$ ;

**$^1\text{H}$  NMR** (400 MHz, Chloroform-*d*)  $\delta$  7.46 (dd,  $J = 8.7, 5.2$  Hz, 1H), 7.28 (dd,  $J = 9.5, 3.1$  Hz, 1H), 6.86 (td,  $J = 8.3, 3.1$  Hz, 1H), 5.04 (s, 1H), 4.96 (s, 1H), 4.50 (s, 2H), 4.03 (s, 2H), 1.79 (s, 3H);

**$^{19}\text{F}\{^1\text{H}\}$  NMR** (376 MHz, Chloroform-*d*)  $\delta$  -114.50;

**$^{13}\text{C}\{^1\text{H}\}$  NMR** (100 MHz, Chloroform-*d*)  $\delta$  142.1, 141.7, 130.87 (q,  $^2J_{\text{C-F}} = 33.0$  Hz), 129.3 (q,  $^3J_{\text{C-F}} = 3.9$  Hz), 128.7, 124.3 (q,  $^3J_{\text{C-F}} = 3.7$  Hz), 123.2 (q,  $^1J_{\text{C-F}} = 272.4$  Hz), 122.0, 112.7, 74.9, 70.7, 19.5;

**HRMS** (ESI)  $m/z$ :  $[\text{M}+\text{H}]^+$  Calcd for:  $\text{C}_{12}\text{H}_{13}\text{BrF}_3\text{O}^+$  309.0096; Found:309.0068.

Raw material **14a** (pale yellow oil)

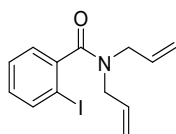

**IR** (neat)  $\nu$  1390, 1128, 1054, 1001, 986, 775, 721, 662  $\text{cm}^{-1}$ ;

**<sup>1</sup>H NMR** (400 MHz, Chloroform-*d*)  $\delta$  7.82 (d,  $J = 7.9$  Hz, 1H), 7.40 – 7.33 (m, 1H), 7.21 (dd,  $J = 7.6, 1.5$  Hz, 1H), 7.07 (td,  $J = 7.8, 1.6$  Hz, 1H), 5.95 (ddt,  $J = 16.6, 10.1, 6.2$  Hz, 1H), 5.67 (ddt,  $J = 16.0, 11.0, 5.7$  Hz, 1H), 5.35 – 5.24 (m, 2H), 5.20 – 5.07 (m, 2H), 4.58 (d,  $J = 13.0$  Hz, 1H), 3.78 (dd,  $J = 14.1, 6.4$  Hz, 1H), 3.69 (t,  $J = 5.9$  Hz, 2H);  
**<sup>13</sup>C{<sup>1</sup>H} NMR** (100 MHz, Chloroform-*d*)  $\delta$  170.5, 142.2, 139.2, 132.6, 132.5, 130.2, 128.2, 127.0, 118.4, 118.2, 92.6, 50.3, 46.4;  
**HRMS** (ESI)  $m/z$ : [M+Na]<sup>+</sup> Calcd for: C<sub>13</sub>H<sub>14</sub>INNaO<sup>+</sup> 350.0012; Found:350.0010.

Raw material **14c** (pale yellow oil)

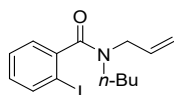

**IR** (neat)  $\nu$  1432, 1246, 1187, 1097, 1058, 983, 755, 709, 663 cm<sup>-1</sup>;  
**<sup>1</sup>H NMR** (400 MHz, Chloroform-*d*, as a mixture of rotamers)  $\delta$  7.88 – 7.76 (m, 1H), 7.41 – 7.33 (m, 1H), 7.24 – 7.16 (m, 1H), 7.09 – 7.03 (m, 1H), 5.97 (ddt,  $J = 16.6, 10.1, 6.3$  Hz, 0.44H), 5.72 – 5.63 (m, 0.58H), 5.39 – 5.20 (m, 1H), 5.18 – 5.08 (m, 1H), 4.59 – 4.35 (m, 0.42H), 3.89 – 3.79 (m, 1H), 3.72 – 3.68 (m, 1H), 3.67 – 3.46 (m, 0.34H), 3.19 – 3.01 (m 1.51H), 1.77 – 1.63 (m, 1H), 1.49 – 1.38 (m, 2H), 1.15 – 1.07 (m, 1H), 0.97 (t,  $J = 7.3$  Hz, 2H), 0.76 (t,  $J = 7.3$  Hz, 1H);  
**<sup>13</sup>C{<sup>1</sup>H} NMR** (100 MHz, Chloroform-*d*, as a mixture of rotamers)  $\delta$  170.5, 142.6, 139.2, 139.1, 133.1, 133.0, 130.0, 128.2, 127.2, 127.0, 118.1, 117.8, 92.7, 59.2, 51.3, 47.6, 46.9, 44.3, 30.2, 29.0, 20.4, 19.8, 13.9, 13.6;  
**HRMS** (ESI)  $m/z$ : [M+H]<sup>+</sup> Calcd for: C<sub>14</sub>H<sub>19</sub>INO<sup>+</sup> 344.0506; Found:344.0499.

Product **3** (a pale yellow solid)

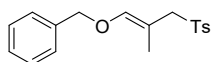

**IR** (neat)  $\nu$  1301, 1287, 1190, 1108, 1066, 1018, 733, 681 cm<sup>-1</sup>;  
**m. p.** 101-102 °C;  
**<sup>1</sup>H NMR** (400 MHz, Chloroform-*d*)  $\delta$  7.68 (d,  $J = 8.0$  Hz, 2H), 7.41–7.17 (m, 7H), 5.83 (s, 1H), 4.71 (s, 2H), 3.58 (s, 2H), 2.42 (s, 3H), 1.69 (s, 3H);

$^{13}\text{C}\{^1\text{H}\}$  NMR (100 MHz, Chloroform-*d*)  $\delta$  148.2, 144.4, 137.1, 135.6, 129.5, 128.6, 128.0, 127.2, 102.6, 74.0, 62.2, 21.7, 13.9;

HRMS (ESI) *m/z*:  $[\text{M}+\text{K}]^+$  Calcd for:  $\text{C}_{18}\text{H}_{20}\text{KO}_4\text{S}^+$  333.1155; Found:333.1140.

Product 4 (yellow oil)

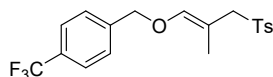

IR (neat)  $\nu$  1310, 1254, 1190, 1083, 1059, 994, 749, 683  $\text{cm}^{-1}$ ;

$^1\text{H}$  NMR (400 MHz, Chloroform-*d*)  $\delta$  7.69 (d,  $J = 8.1$  Hz, 2H), 7.61 (d,  $J = 8.0$  Hz, 2H), 7.35 (d,  $J = 8.0$  Hz, 2H), 7.27 (d,  $J = 7.7$  Hz, 2H), 5.86 (s, 1H), 4.78 (s, 2H), 3.59 (s, 2H), 2.42 (s, 3H), 1.71 (s, 3H);

$^{19}\text{F}\{^1\text{H}\}$  NMR (376 MHz, Chloroform-*d*)  $\delta$  -62.61;

$^{13}\text{C}\{^1\text{H}\}$  NMR (100 MHz, Chloroform-*d*)  $\delta$  147.9, 144.5, 141.2, 135.7, 130.1(d,  $^2J_{\text{C-F}} = 44.9$ ), 129.6, 128.5, 127.1, 125.5(q,  $^4J_{\text{C-F}} = 3.81$ ), 103.4, 73.1, 62.0, 21.6, 13.9.

HRMS (ESI) *m/z*:  $[\text{M}+\text{Na}]^+$  Calcd for:  $\text{C}_{19}\text{H}_{19}\text{F}_3\text{NaO}_3^+$  407.0899; Found:407.0877.

Product 5 (yellow oil)

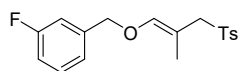

IR (neat)  $\nu$  1306, 1279, 1196, 1096, 1053, 987, 740, 663  $\text{cm}^{-1}$ ;

$^1\text{H}$  NMR (400 MHz, Chloroform-*d*)  $\delta$  7.74 – 7.62 (m, 2H), 7.33 – 7.25 (m, 3H), 7.02 – 6.97 (m, 2H), 6.93 (dt,  $J = 9.5, 2.1$  Hz, 1H), 5.82 (s, 1H), 4.70 (s, 2H), 3.59 (s, 2H), 2.42 (s, 3H), 1.69 (d,  $J = 1.2$  Hz, 3H);

$^{19}\text{F}\{^1\text{H}\}$  NMR (376 MHz, Chloroform-*d*)  $\delta$  -112.64;

$^{13}\text{C}\{^1\text{H}\}$  NMR (100 MHz, Chloroform-*d*)  $\delta$  162.9 (d,  $^1J_{\text{C-F}} = 246.5$  Hz), 147.9, 144.4, 139.7 (d,  $^3J_{\text{C-F}} = 7.1$  Hz), 135.6, 130.1 (d,  $^3J_{\text{C-F}} = 8.2$  Hz), 129.6, 128.5, 122.5 (d,  $^4J_{\text{C-F}} = 3.0$  Hz), 114.9 (d,  $^2J_{\text{C-F}} = 21.2$  Hz), 113.9 (d,  $^2J_{\text{C-F}} = 22.0$  Hz), 103.2, 73.1 (d,  $^4J_{\text{C-F}} = 2.0$  Hz), 62.1, 21.6, 13.9;

HRMS (ESI) *m/z*:  $[\text{M}+\text{H}]^+$  Calcd for:  $\text{C}_{18}\text{H}_{20}\text{FO}_3\text{S}^+$  335.1122; Found: 335.1109.

Product 6 (a pale yellow solid)

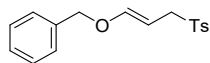

**m. p.** 97-98 °C;

**IR** (neat)  $\nu$  1190, 1108, 1066, 1018, 975, 787, 733, 681  $\text{cm}^{-1}$ ;

**$^1\text{H}$  NMR** (400 MHz, Chloroform-*d*)  $\delta$  7.69 (d,  $J = 7.8$  Hz, 2H), 7.39 – 7.25 (m, 7H), 6.32 (d,  $J = 12.7$  Hz, 1H), 4.82 – 4.73 (m, 1H), 4.75 (s, 2H), 3.64 (d,  $J = 7.9$  Hz, 2H), 2.43 (s, 3H);

**$^{13}\text{C}\{^1\text{H}\}$  NMR** (100 MHz, Chloroform-*d*)  $\delta$  153.1, 144.5, 136.1, 135.3, 129.7, 128.6, 128.6, 128.2, 127.5, 91.2, 71.5, 56.7, 21.6;

**HRMS** (ESI)  $m/z$ :  $[\text{M}+\text{K}]^+$  Calcd for:  $\text{C}_{17}\text{H}_{18}\text{KO}_3\text{S}^+$  333.1155; Found:333.1140.

Product 7 (a white solid)

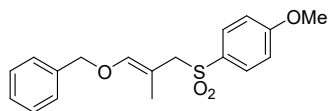

**m. p.** 101-102 °C;

**IR** (neat)  $\nu$  1309, 1297, 1185, 1042, 1018,975, 733, 681  $\text{cm}^{-1}$ ;

**$^1\text{H}$  NMR** (400 MHz, Chloroform-*d*)  $\delta$  7.72 (d,  $J = 8.8$  Hz, 2H), 7.39 – 7.20 (m, 5H), 7.05 – 6.83 (m, 2H),5.84 (s, 1H), 4.72 (s, 2H), 3.86 (s, 3H), 3.58 (s, 2H), 1.68 (s, 3H);

**$^{13}\text{C}\{^1\text{H}\}$  NMR** (100 MHz, Chloroform-*d*)  $\delta$  163.6, 148.1, 137.1, 130.7, 130.1, 128.5, 128.0, 127.2, 114.1, 102.8, 74.0, 62.3, 55.6, 13.9;

**HRMS** (ESI)  $m/z$ :  $[\text{M}+\text{H}]^+$  Calcd for:  $\text{C}_{18}\text{H}_{21}\text{O}_4\text{S}^+$  333.1155; Found:333.1152.

Product 8 (a white solid)

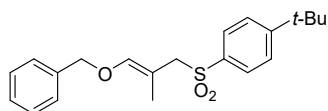

**m. p.** 107-108 °C;

**IR** (neat)  $\nu$  1306, 1190, 1094, 1032, 964, 745, 697, 662 $\text{cm}^{-1}$ ;



**<sup>1</sup>H NMR** (400 MHz, Chloroform-*d*)  $\delta$  7.77 – 7.70 (m, 2H), 7.52 – 7.47 (m, 2H), 7.38 – 7.30 (m, 3H), 7.26 – 7.23 (m, 2H), 5.84 (s, 1H), 4.69 (s, 2H), 3.59 (s, 2H), 1.70 (d,  $J$  = 1.5 Hz, 3H), 1.33 (s, 9H);

**<sup>13</sup>C{<sup>1</sup>H} NMR** (100 MHz, Chloroform-*d*)  $\delta$  157.4, 148.2, 137.1, 135.6, 128.6, 128.4, 128.1, 127.2, 125.9, 102.6, 74.0, 62.1, 35.2, 31.1, 13.9;

**HRMS** (ESI)  $m/z$ : [M+H]<sup>+</sup> Calcd for: C<sub>21</sub>H<sub>27</sub>O<sub>3</sub>S<sup>+</sup> 359.1675; Found: 359.1678.

Product **9** (colorless oil)

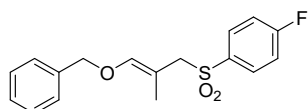

**IR** (neat)  $\nu$  1302, 1279, 1156, 1077, 1018, 966, 733, 681 cm<sup>-1</sup>;

**<sup>1</sup>H NMR** (400 MHz, Chloroform-*d*)  $\delta$  7.88 – 7.69 (m, 2H), 7.41 – 7.29 (m, 3H), 7.21 (dd,  $J$  = 7.4, 2.1 Hz, 2H), 7.16 – 7.04 (m, 2H), 5.79 (q,  $J$  = 1.2 Hz, 1H), 4.71 (s, 2H), 3.59 (s, 2H), 1.70 (s, 3H);

**<sup>19</sup>F{<sup>1</sup>H} NMR** (376 MHz, Chloroform-*d*)  $\delta$  -103.69;

**<sup>13</sup>C{<sup>1</sup>H} NMR** (100 MHz, Chloroform-*d*)  $\delta$  165.7 (d,  $^1J_{C-F}$  = 255.9 Hz), 148.3, 136.9, 134.3, 131.3 (d,  $^3J_{C-F}$  = 9.6 Hz), 128.6, 128.2, 127.3, 116.2 (d,  $^2J_{C-F}$  = 22.5 Hz), 102.4, 74.1, 62.3, 13.8;

**HRMS** (ESI)  $m/z$ : [M+K]<sup>+</sup> Calcd for: C<sub>17</sub>H<sub>17</sub>FKO<sub>3</sub>S<sup>+</sup> 359.0514; Found: 359.0486.

Product **10** (a white solid)

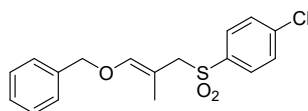

**m. p.** 89-91 °C;

**IR** (neat)  $\nu$  1311, 1267, 1174, 1102, 992, 785, 733, 681 cm<sup>-1</sup>;

**<sup>1</sup>H NMR** (400 MHz, Chloroform-*d*)  $\delta$  7.77 – 7.64 (m, 2H), 7.44 – 7.31 (m, 5H), 7.22 (d,  $J$  = 2.1 Hz, 2H), 5.80 (s, 1H), 4.72 (s, 2H), 3.60 (s, 2H), 1.71 (s, 3H);

**<sup>13</sup>C{<sup>1</sup>H} NMR** (100 MHz, Chloroform-*d*)  $\delta$  148.3, 140.2, 136.9, 136.7, 130.0, 129.2, 128.6, 128.2, 127.3, 102.3, 74.1, 62.2, 13.8;

**HRMS** (ESI)  $m/z$ :  $[M+Na]^+$  Calcd for:  $C_{17}H_{17}ClNaO_4S^+$  359.0479; Found:359.0477.

Product **11** (yellow oil)

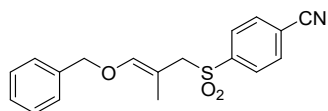

**IR** (neat)  $\nu$  1301, 1290, 1186, 1103, 1054, 989, 733, 681  $cm^{-1}$ ;

**$^1H$  NMR** (400 MHz, Acetone- $d_6$ )  $\delta$  8.01 – 7.93 (m, 4H), 7.41 – 7.33 (m, 3H), 7.28 – 7.20 (m, 2H), 5.98 (d,  $J$  = 1.7 Hz, 1H), 4.74 (s, 2H), 3.87 (s, 2H), 1.72 (d,  $J$  = 1.3 Hz, 3H);

**$^{13}C\{^1H\}$  NMR** (100 MHz, Acetone- $d_6$ )  $\delta$  149.0, 142.8, 137.5, 132.8, 129.2, 128.5, 127.9, 127.3, 117.3, 116.8, 101.6, 73.6, 60.8, 12.9;

**HRMS** (ESI)  $m/z$ :  $[M+H]^+$  Calcd for:  $C_{18}H_{18}NO_3S^+$  328.1102; Found: 328.1090.

Product **12** (yellow oil)

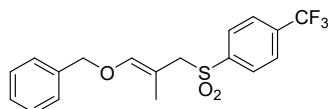

**IR** (neat)  $\nu$  1303, 1283, 1122, 1091, 1037,991, 733, 681  $cm^{-1}$ ;

**$^1H$  NMR** (400 MHz, Acetone- $d_6$ )  $\delta$  8.05 (d,  $J$  = 8.2 Hz, 2H), 7.94 (d,  $J$  = 8.3 Hz, 2H), 7.37 – 7.30 (m, 3H), 7.25 (dd,  $J$  = 7.9, 1.7 Hz, 2H), 6.02 (q,  $J$  = 1.2 Hz, 1H), 4.73 (s, 2H), 3.87 (s, 2H), 1.72 (s, 3H);

**$^{19}F\{^1H\}$  NMR** (376 MHz, Acetone- $d_6$ )  $\delta$  -63.091;

**$^{13}C\{^1H\}$  NMR** (100 MHz, Acetone- $d_6$ )  $\delta$ 148.9, 142.9, 137.5, 134.2 (q,  $^2J_{C-F}$  = 32.6 Hz), 129.4, 128.4, 127.9, 127.2, 126.1 (q,  $^3J_{C-F}$  = 3.8 Hz), 123.6 (q,  $^1J_{C-F}$  = 272.3 Hz), 101.8, 73.6, 60.9, 13.0;

**HRMS** (ESI)  $m/z$ :  $[M+H]^+$  Calcd for:  $C_{18}H_{18}F_3O_3S^+$  371.0923; Found:371.0925.

Product **13** (a white solid)

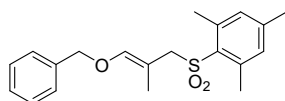

**m. p.** 103-104 °C;

**IR** (neat)  $\nu$  1317, 1296, 1277, 1180, 1104, 1018, 733, 681  $\text{cm}^{-1}$ ;

**$^1\text{H}$  NMR** (400 MHz, Chloroform-*d*)  $\delta$  7.37 – 7.30 (m, 3H), 7.25 – 7.20 (m, 2H), 6.90 (s, 2H), 5.86 (d,  $J$  = 1.6 Hz, 1H), 4.71 (s, 2H), 3.59 (s, 2H), 2.60 (s, 6H), 2.29 (s, 3H), 1.69 (d,  $J$  = 1.3 Hz, 3H);

**$^{13}\text{C}\{^1\text{H}\}$  NMR** (100 MHz, Chloroform-*d*)  $\delta$  148.0, 143.0, 140.4, 137.1, 132.7, 132.0, 128.5, 128.0, 127.3, 102.2, 74.0, 61.6, 23.0, 21.0, 14.2;

**HRMS** (ESI)  $m/z$ :  $[\text{M}+\text{H}]^+$  Calcd for:  $\text{C}_{20}\text{H}_{25}\text{O}_3\text{S}^+$  345.1519; Found: 345.1501.

Product **15** (yellow oil)

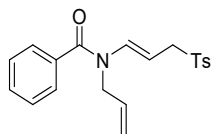

**IR** (neat)  $\nu$  1636, 1586, 1318, 1144, 1064, 951, 797, 693  $\text{cm}^{-1}$ ;

**$^1\text{H}$  NMR** (400 MHz, Chloroform-*d*)  $\delta$  7.71 (d,  $J$  = 8.2 Hz, 2H), 7.48 – 7.24 (m, 7H), 6.60 (s, 1H), 5.80 (ddt,  $J$  = 15.6, 10.1, 4.9 Hz, 1H), 5.27 (d,  $J$  = 10.4 Hz, 1H), 5.17 (d,  $J$  = 17.2 Hz, 1H), 4.96 (dt,  $J$  = 14.7, 7.8 Hz, 1H), 4.34 (s, 2H), 3.67 (d,  $J$  = 7.8 Hz, 2H), 2.48 (s, 3H);

**$^{13}\text{C}\{^1\text{H}\}$  NMR** (100 MHz, Chloroform-*d*)  $\delta$  170.1, 144.8, 135.3, 134.3, 131.6, 130.8, 129.7, 128.6, 128.4, 127.8, 58.6, 21.7;

**HRMS** (ESI)  $m/z$ :  $[\text{M}+\text{H}]^+$  Calcd for:  $\text{C}_{18}\text{H}_{21}\text{O}_4\text{S}^+$  356.1315; Found: 356.1318.

Product **16** (yellow oil)

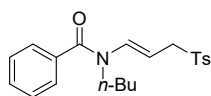

**IR** (neat)  $\nu$  1441, 1306, 1253, 1144, 1025, 978, 766, 632  $\text{cm}^{-1}$ ;

**$^1\text{H}$  NMR** (400 MHz, Chloroform-*d*)  $\delta$  7.72 (d,  $J$  = 7.9 Hz, 2H), 7.455 – 7.31 (m, 5H), 7.20 (d,  $J$  = 7.6 Hz, 2H), 6.48 (s, 1H), 4.91 (dt,  $J$  = 14.8, 7.7 Hz, 1H), 3.85 – 3.57 (m, 4H), 2.49 (s, 3H), 1.60 (p,  $J$  = 7.3 Hz, 2H), 1.40 – 1.30 (m, 2H), 0.96 (t,  $J$  = 7.4 Hz, 3H);

**$^{13}\text{C}\{^1\text{H}\}$  NMR** (100 MHz, Chloroform-*d*)  $\delta$  170.2, 144.7, 135.3, 134.6, 130.6, 129.7, 128.6, 128.4, 127.9, 95.1, 58.7, 43.3, 28.8, 21.7, 20.2, 13.8;

**HRMS** (ESI)  $m/z$ :  $[\text{M}+\text{K}]^+$  Calcd for:  $\text{C}_{21}\text{H}_{25}\text{KNO}_3\text{S}^+$  410.1187; Found: 410.1157.

Product **17** (yellow oil)

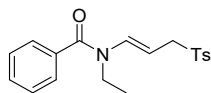

**IR** (neat)  $\nu$  1498, 1322, 1163, 1070, 991, 886, 754, 663  $\text{cm}^{-1}$ ;

**$^1\text{H}$  NMR** (400 MHz, Chloroform-*d*)  $\delta$  7.72 (d,  $J = 8.0$  Hz, 2H), 7.45 – 7.41 (m, 1H), 7.38 – 7.32 (m, 4H), 7.21 (d,  $J = 7.7$  Hz, 2H), 6.49 (s, 1H), 4.95 (dt,  $J = 14.8, 7.8$  Hz, 1H), 3.77 (q,  $J = 7.3, 6.9$  Hz, 2H), 3.67 (d,  $J = 7.7$  Hz, 2H), 2.49 (s, 3H), 1.21 (t,  $J = 7.1$  Hz, 3H);

**$^{13}\text{C}\{^1\text{H}\}$  NMR** (100 MHz, Chloroform-*d*)  $\delta$  170.0, 144.8, 135.3, 134.6, 130.6, 129.8, 128.6, 128.4, 127.8, 95.1, 58.7, 38.6, 21.7, 12.0;

**HRMS** (ESI)  $m/z$ :  $[\text{M}+\text{H}]^+$  Calcd for:  $\text{C}_{19}\text{H}_{22}\text{NO}_3\text{S}^+$  344.1315; Found: 344.1307.

Product **18** (yellow oil)

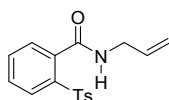

**IR** (neat)  $\nu$  1620, 1589, 1325, 1163, 1058, 972, 763, 645  $\text{cm}^{-1}$ ;

**$^1\text{H}$  NMR** (400 MHz, Chloroform-*d*)  $\delta$  8.09 (d,  $J = 7.6$  Hz, 1H), 7.85 (d,  $J = 7.9$  Hz, 2H), 7.60 – 7.46 (m, 3H), 7.27 (d,  $J = 5.5$  Hz, 2H), 6.32 (s, 1H), 5.97 (ddt,  $J = 16.4, 11.0, 5.8$  Hz, 1H), 5.33 (d,  $J = 17.1$  Hz, 1H), 5.21 (d,  $J = 10.4$  Hz, 1H), 4.05 (t,  $J = 5.9$  Hz, 2H), 2.39 (s, 3H);

**$^{13}\text{C}\{^1\text{H}\}$  NMR** (100 MHz, Chloroform-*d*)  $\delta$  167.5, 144.5, 138.6, 137.7, 136.7, 133.5, 133.3, 130.01, 129.7, 129.5, 129.4, 128.2, 117.1, 42.8, 21.6;

**HRMS** (ESI)  $m/z$ :  $[\text{M}+\text{H}]^+$  Calcd for:  $\text{C}_{17}\text{H}_{18}\text{O}_3\text{S}^+$  316.1002; Found: 316.0990.

Product **19** (yellow oil)

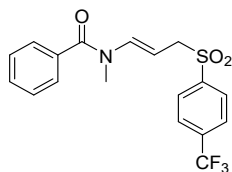

**IR** (neat)  $\nu$  1457, 1318, 1265, 1124, 1058, 972, 763, 662  $\text{cm}^{-1}$ ;

**$^1\text{H}$  NMR** (400 MHz, Chloroform-*d*)  $\delta$  8.00 (d,  $J = 8.0$  Hz, 2H), 7.85 (d,  $J = 8.2$  Hz, 2H), 7.49 – 7.27 (m, 5H), 6.75 (s, 1H), 4.94 (dt,  $J = 14.6, 7.7$  Hz, 1H), 3.76 (d,  $J = 7.8$  Hz, 2H), 3.21 (s, 3H);

**$^{19}\text{F}\{^1\text{H}\}$  NMR** (376 MHz, Chloroform-*d*)  $\delta$  -63.12;

**$^{13}\text{C}\{^1\text{H}\}$  NMR** (100 MHz, Chloroform-*d*)  $\delta$  170.3, 142.0, 135.4, 134.2, 130.8, 130.8, 130.2, 129.2, 128.56, 127.9, 126.3 (q,  $^3J_{\text{C-F}} = 3.7$  Hz), 123.1 (q,  $^1J_{\text{C-F}} = 273.1$  Hz), 94.1, 58.4;

**HRMS** (ESI)  $m/z$ :  $[\text{M}+\text{H}]^+$  Calcd for:  $\text{C}_{18}\text{H}_{17}\text{F}_3\text{NO}_3\text{S}^+$  384.0876; Found: 384.0846.

Product **20** (yellow oil)

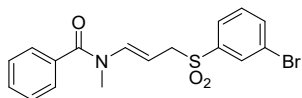

**IR** (neat)  $\nu$  1436, 1327, 1129, 1025, 938, 792, 776, 683  $\text{cm}^{-1}$ ;

**$^1\text{H}$  NMR** (400 MHz, Chloroform-*d*)  $\delta$  7.89 – 7.83 (m, 2H), 7.72 – 7.67 (m, 1H), 7.58 (dd,  $J = 8.4, 7.1$  Hz, 2H), 7.48 – 7.34 (m, 4H), 6.69 (s, 1H), 4.99 – 4.92 (m, 1H), 3.72 (s, 2H), 3.21 (s, 3H);

**$^{13}\text{C}\{^1\text{H}\}$  NMR** (100 MHz, Chloroform-*d*)  $\delta$  170.3, 138.4, 136.8, 134.3, 133.8, 130.7, 129.2, 128.6, 128.5, 128.0, 58.4, 29.7;

**HRMS** (ESI)  $m/z$ :  $[\text{M}+\text{Na}]^+$  Calcd for:  $\text{C}_{17}\text{H}_{16}\text{BrNNaO}_3\text{S}^+$  415.9926; Found: 415.9917.

Product **21** (a white solid)

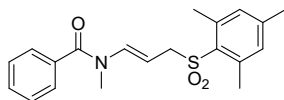

**m. p.** 106-107  $^{\circ}\text{C}$ ;

**IR** (neat)  $\nu$  1448, 1329, 1137, 1064, 951, 797, 754, 693  $\text{cm}^{-1}$ ;

**<sup>1</sup>H NMR** (400 MHz, Chloroform-*d*)  $\delta$  7.47 – 7.43 (m, 1H), 7.36 (t,  $J = 7.6$  Hz, 2H), 7.27 – 7.20 (m, 2H), 6.98 (s, 2H), 6.72 (s, 1H), 5.03 – 4.96 (m, 1H), 3.72 (s, 2H), 3.19 (s, 3H), 2.62 (s, 6H), 2.34 (s, 3H);

**<sup>13</sup>C{<sup>1</sup>H} NMR** (100 MHz, Chloroform-*d*)  $\delta$  170.3, 143.4, 140.3, 134.3, 132.2, 130.7, 128.4, 128.0, 58.2, 23.1, 21.1.;

**HRMS** (ESI)  $m/z$ :  $[M+H]^+$  Calcd for: C<sub>20</sub>H<sub>24</sub>NO<sub>3</sub>S<sup>+</sup> 358.1471; Found: 358.1465.

Product **22** (yellow oil)

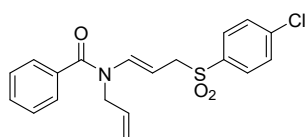

**IR** (neat)  $\nu$  1640, 1577, 1309, 1152, 1048, 929, 786, 662 cm<sup>-1</sup>;

**<sup>1</sup>H NMR** (400 MHz, Chloroform-*d*)  $\delta$  7.91 – 7.80 (m, 2H), 7.73 – 7.66 (m, 1H), 7.57 (t,  $J = 8.5$  Hz, 2H), 7.48 – 7.42 (m, 1H), 7.36 (t,  $J = 8.5$  Hz, 2H), 7.28 (s, 1H), 6.63 (s, 1H), 5.80 (ddt,  $J = 17.2, 10.1, 4.9$  Hz, 1H), 5.26 (d,  $J = 10.5$  Hz, 1H), 5.16 (d,  $J = 17.3$  Hz, 1H), 4.95 (dt,  $J = 14.8, 7.7$  Hz, 1H), 4.34 (s, 2H), 3.69 (d,  $J = 7.7$  Hz, 2H);

**<sup>13</sup>C{<sup>1</sup>H} NMR** (100 MHz, Chloroform-*d*)  $\delta$  170.1, 138.3, 133.8, 131.6, 130.8, 129.1, 128.6, 128.5, 117.1, 58.6;

**HRMS** (ESI)  $m/z$ :  $[M+Na]^+$  Calcd for: C<sub>19</sub>H<sub>22</sub>ClNNaO<sub>3</sub>S<sup>+</sup> 398.0588; Found: 398.0601.

Product **23** (yellow oil)

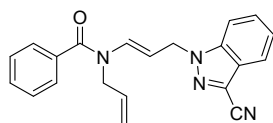

**IR** (neat)  $\nu$  1639, 1218, 1085, 950, 769, 746, 720, 699 cm<sup>-1</sup>;

**<sup>1</sup>H NMR** (400 MHz, Chloroform-*d*)  $\delta$  7.82 (d,  $J = 8.2$  Hz, 1H), 7.52 – 7.34 (m, 8H), 6.81 (s, 1H), 5.82 – 5.73 (m, 1H), 5.31 – 5.24 (m, 1H), 5.20 – 5.14 (m, 2H), 5.02 (s, 2H), 4.31 (s, 2H);

**<sup>13</sup>C NMR** {<sup>1</sup>H} (100 MHz, Chloroform-*d*)  $\delta$  170.4, 139.2, 134.6, 131.6, 130.7, 128.5, 127.8, 126.9, 125.7, 123.7, 119.8, 117.9, 117.1, 113.5, 110.3, 50.7, 42.5;

**HRMS** (ESI)  $m/z$ :  $[M+H]^+$  Calcd for: C<sub>21</sub>H<sub>19</sub>N<sub>4</sub>O<sup>+</sup> 343.1553; Found: 343.1526

Product **24** (yellow oil)

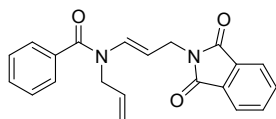

**IR** (neat)  $\nu$  1699, 1345, 1127, 1064, 989, 768, 681, 633 $\text{cm}^{-1}$ ;

**$^1\text{H}$  NMR** (400 MHz, Chloroform-*d*)  $\delta$  7.83 (dt,  $J = 7.4, 3.7$  Hz, 2H), 7.76 – 7.67 (m, 2H), 7.54 – 7.36 (m, 5H), 6.89 (s, 1H), 5.80 (ddt,  $J = 15.0, 9.8, 4.4$  Hz, 1H), 5.28 – 5.02 (m, 3H), 4.34 (s, 2H), 4.20 (s, 2H);

**$^{13}\text{C}$  NMR { $^1\text{H}$ }** (100 MHz, Chloroform-*d*)  $\delta$  170.2, 167.8, 134.8, 134.0, 132.1, 131.9, 130.5, 128.4, 128.1, 123.3, 116.9, 37.9, 29.7;

**HRMS** (ESI)  $m/z$ :  $[\text{M}+\text{H}]^+$  Calcd for:  $\text{C}_{21}\text{H}_{19}\text{N}_2\text{O}_3^+$  347.1390; Found: 347.1367

Product **3'** (white oil)

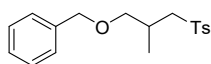

**IR** (neat)  $\nu$  1603, 1288, 1145, 1021, 991, 751, 667, 631 $\text{cm}^{-1}$ ;

**$^1\text{H}$  NMR** (400 MHz, Chloroform-*d*)  $\delta$  7.81 (d,  $J = 8.2$  Hz, 2H), 7.39 – 7.25 (m, 7H), 4.44 (s, 2H), 3.47 – 3.38 (m, 2H), 3.33 (dd,  $J = 9.3, 6.5$  Hz, 1H), 2.94 (dd,  $J = 14.2, 7.9$  Hz, 1H), 2.46 (s, 3H), 2.44 – 2.34 (m, 1H), 1.14 (d,  $J = 6.9$  Hz, 3H);

**$^{13}\text{C}$ { $^1\text{H}$ }** NMR (100 MHz, Chloroform-*d*)  $\delta$  144.5, 138.1, 137.1, 129.9, 128.4, 127.9, 127.7, 127.5, 73.6, 72.9, 59.4, 29.5, 21.7, 17.2;

**HRMS** (ESI)  $m/z$ :  $[\text{M}+\text{H}]^+$  Calcd for:  $\text{C}_{18}\text{H}_{23}\text{O}_3\text{S}^+$  319.1362; Found: 319.1359.

## 7. NMR Spectra of Compounds of 1d-1e, 14a, 14c, 3-13, 15-24, 3'

### $^1\text{H}$ NMR (400MHz, $\text{CDCl}_3$ ) spectrum of raw material 1d

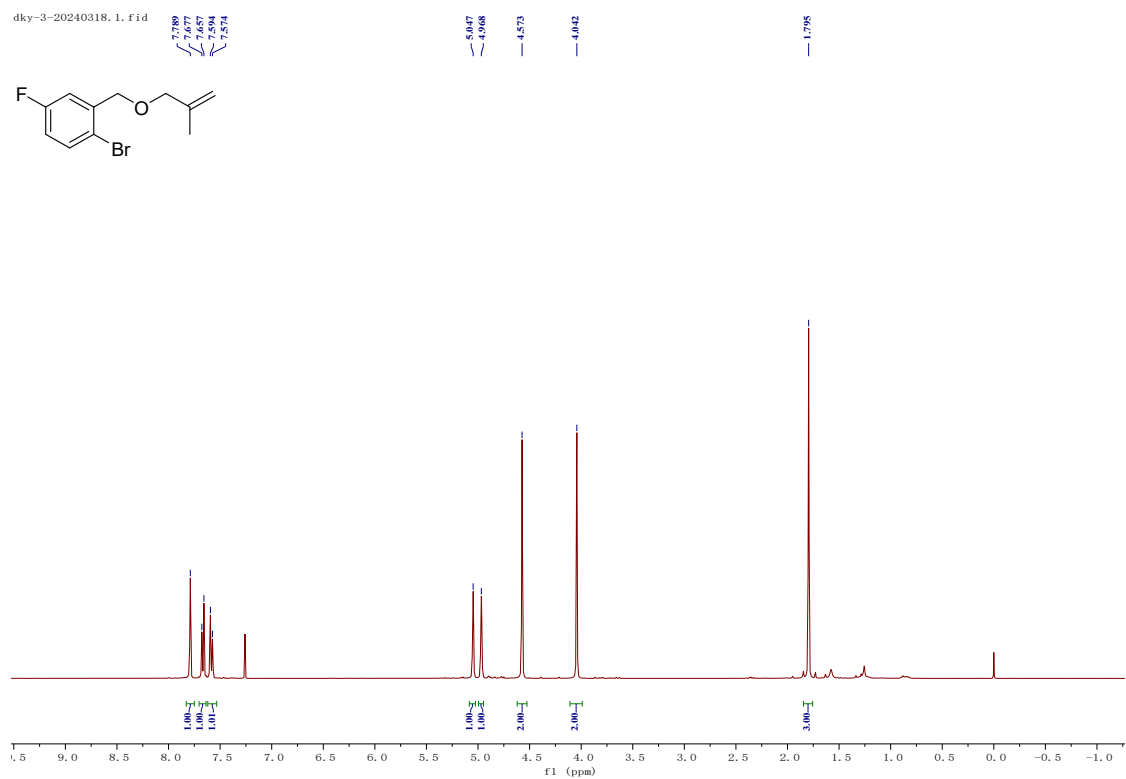

### $^{19}\text{F}$ NMR (376MHz, $\text{CDCl}_3$ ) spectrum of product 1d



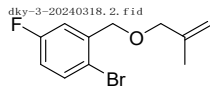

43.887

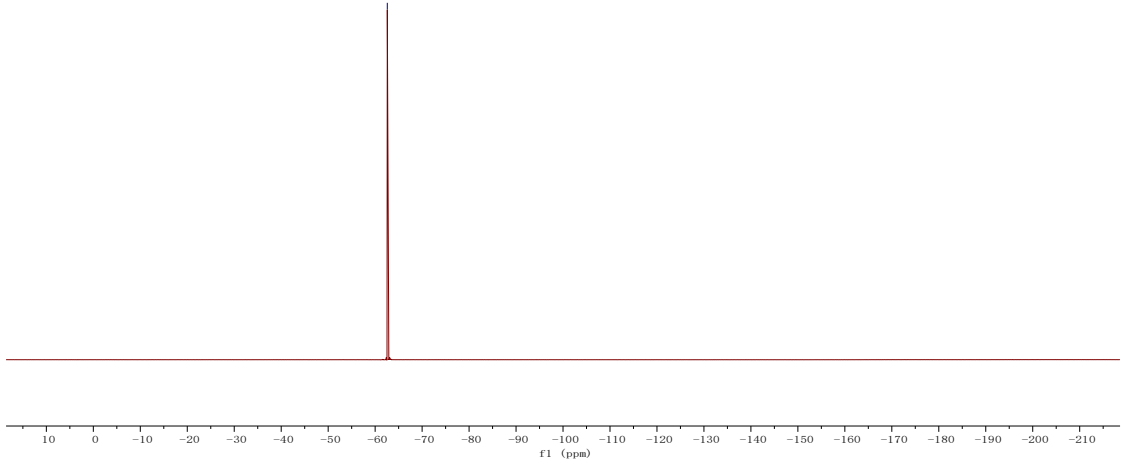

# <sup>13</sup>C NMR (400MHz, CDCl<sub>3</sub>) spectrum of raw material 1d

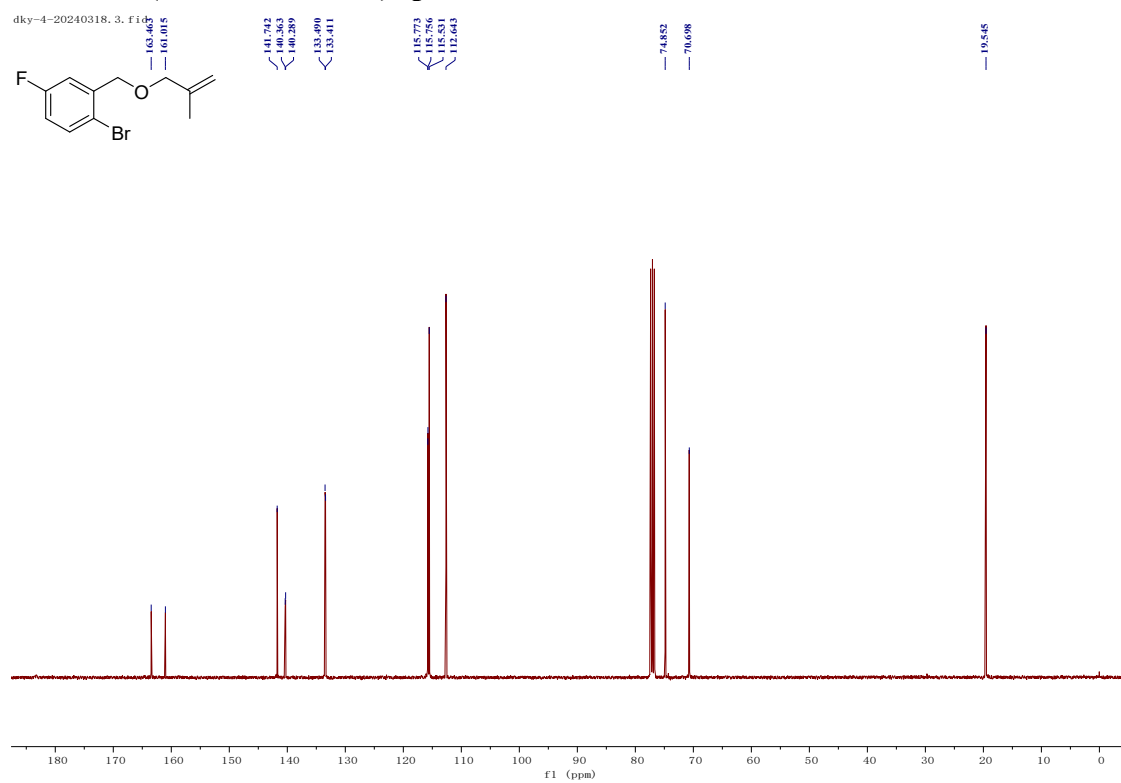

# <sup>1</sup>H NMR (400MHz, CDCl<sub>3</sub>) spectrum of raw material 1e

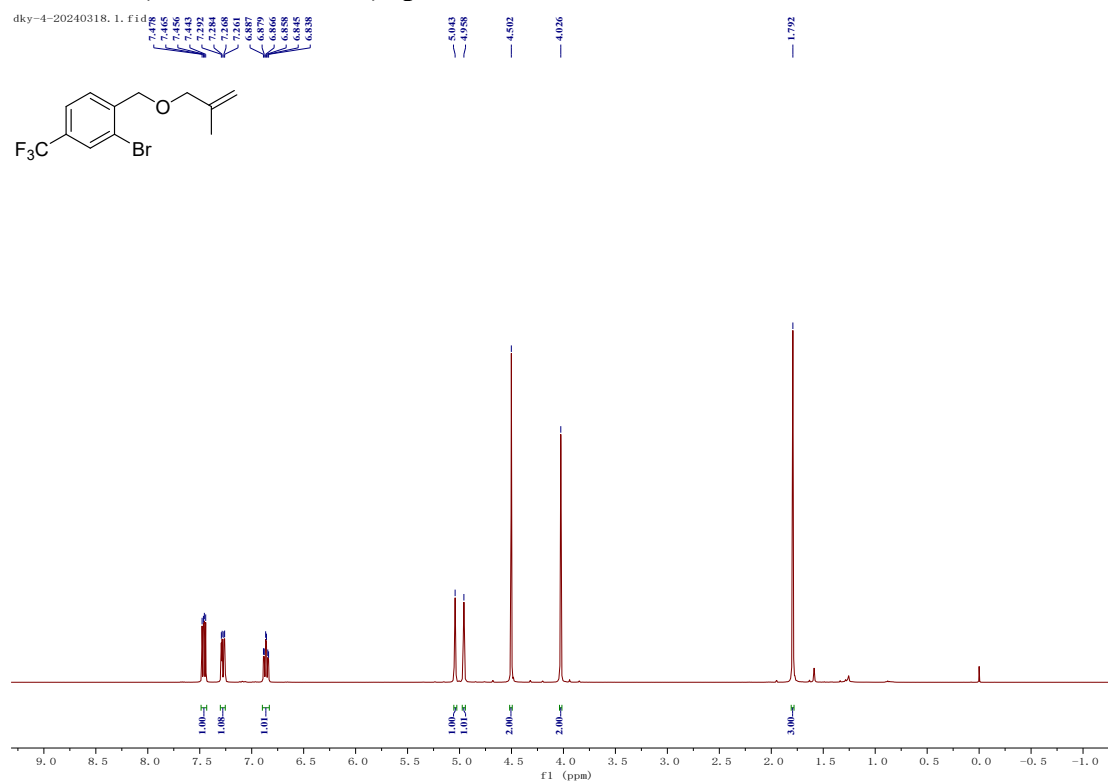

# <sup>19</sup>F NMR (376MHz, CDCl<sub>3</sub>) spectrum of product 1e

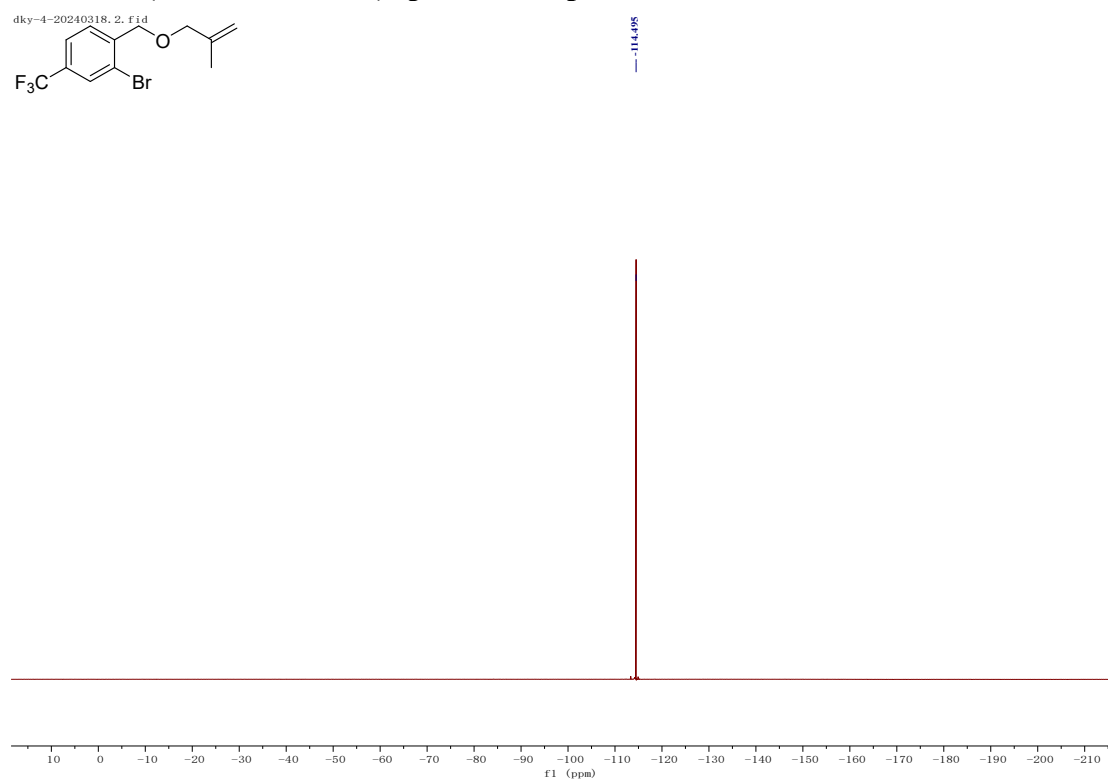

# <sup>13</sup>C NMR (400MHz, CDCl<sub>3</sub>) spectrum of raw material 1e

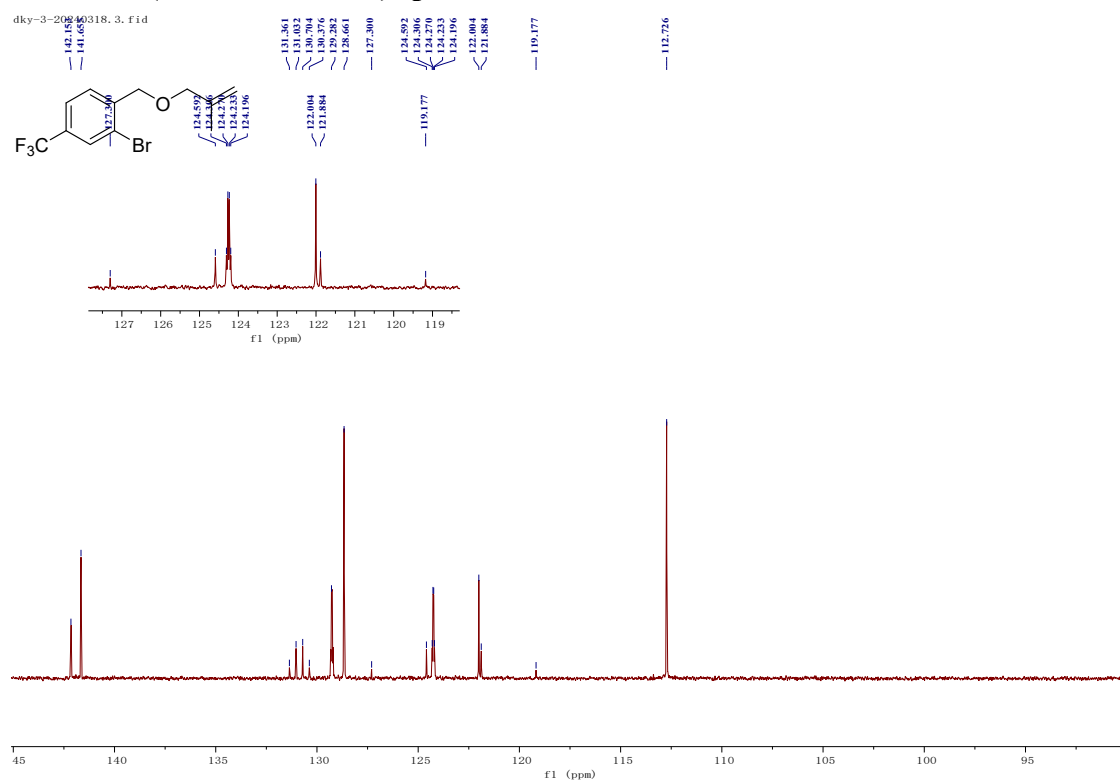

# <sup>1</sup>H NMR (400MHz, CDCl<sub>3</sub>) spectrum of raw material 14a

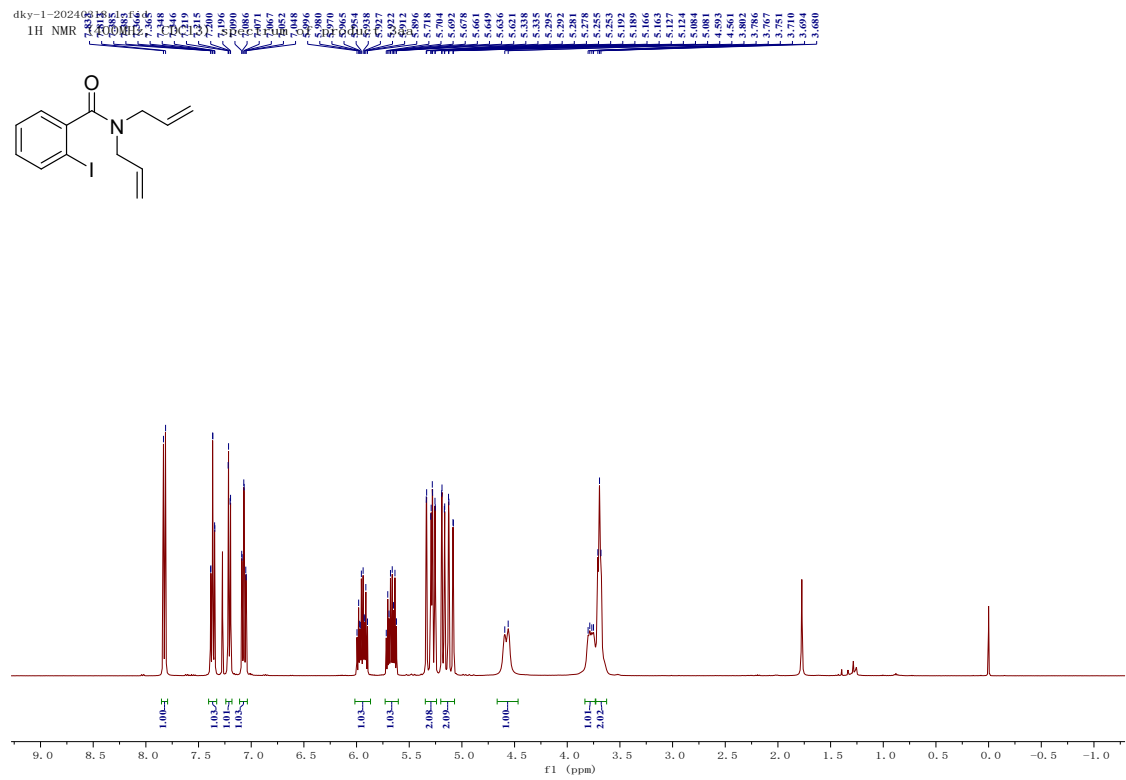

# <sup>13</sup>C NMR (400MHz, CDCl<sub>3</sub>) spectrum of raw material 14a

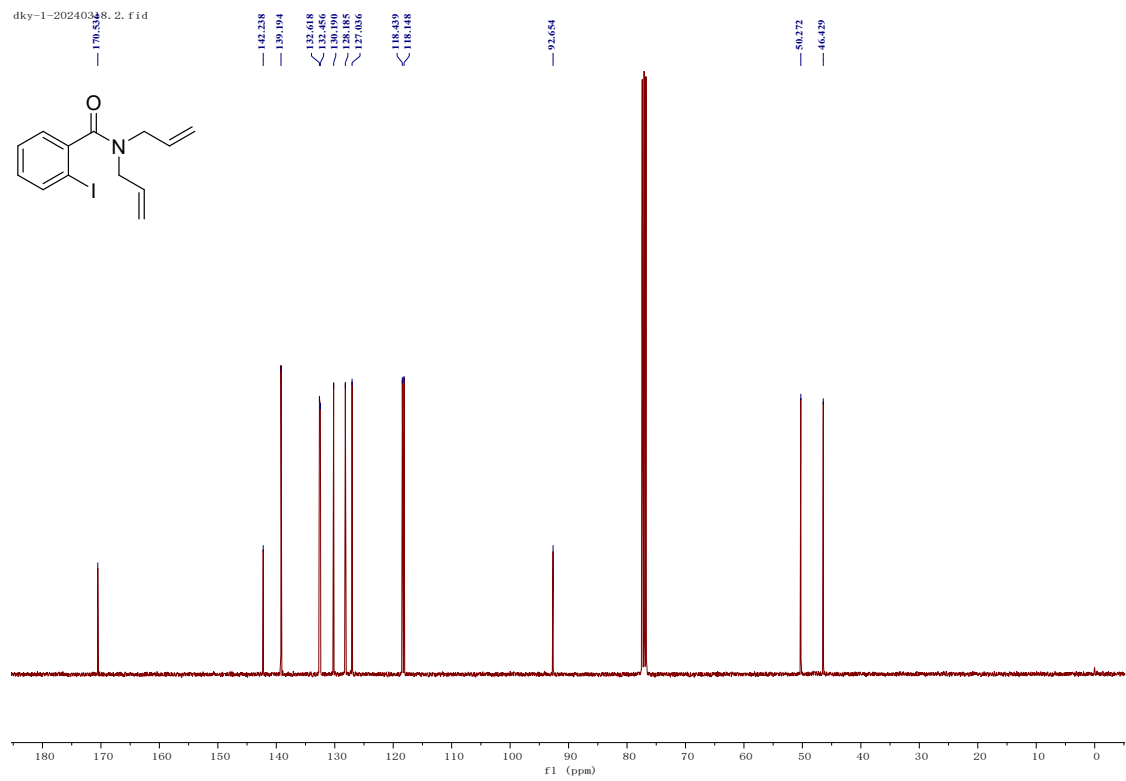

**<sup>1</sup>H NMR (400MHz, CDCl<sub>3</sub>) spectrum of raw material 14c**

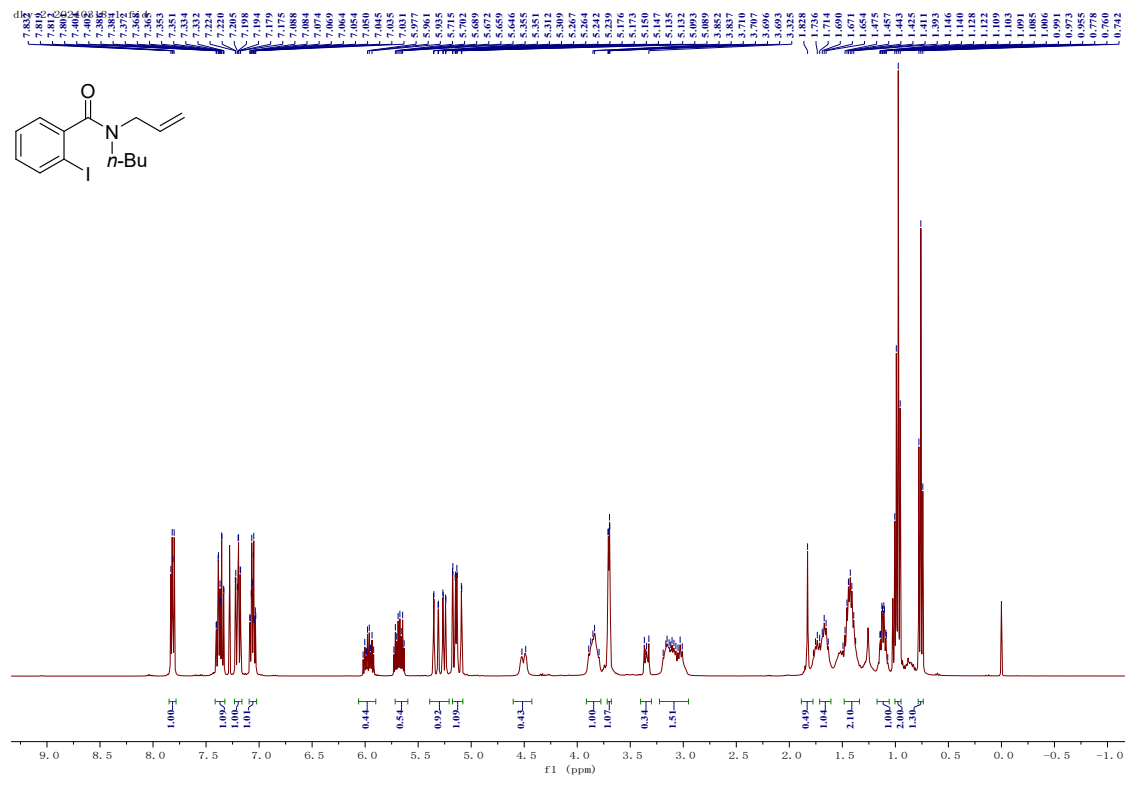

**<sup>13</sup>C NMR (400MHz, CDCl<sub>3</sub>) spectrum of raw material 14c**

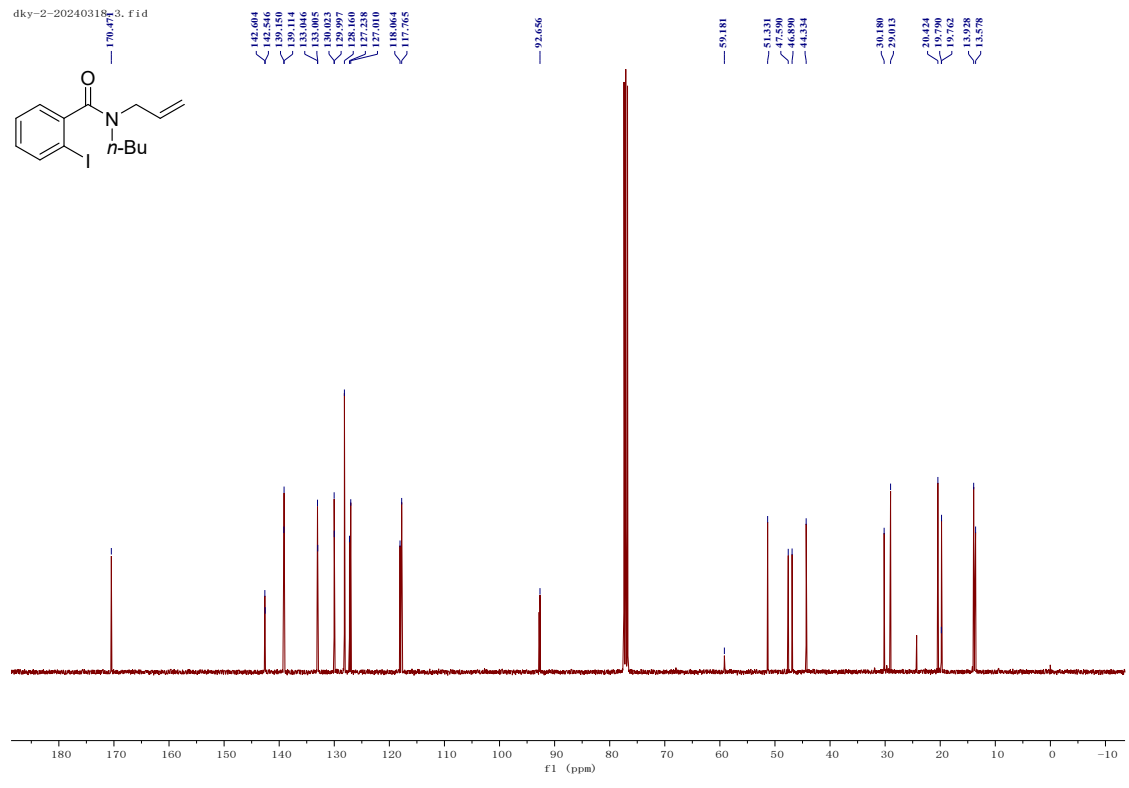

### <sup>1</sup>H NMR (400MHz, CDCl<sub>3</sub>) spectrum of product 3

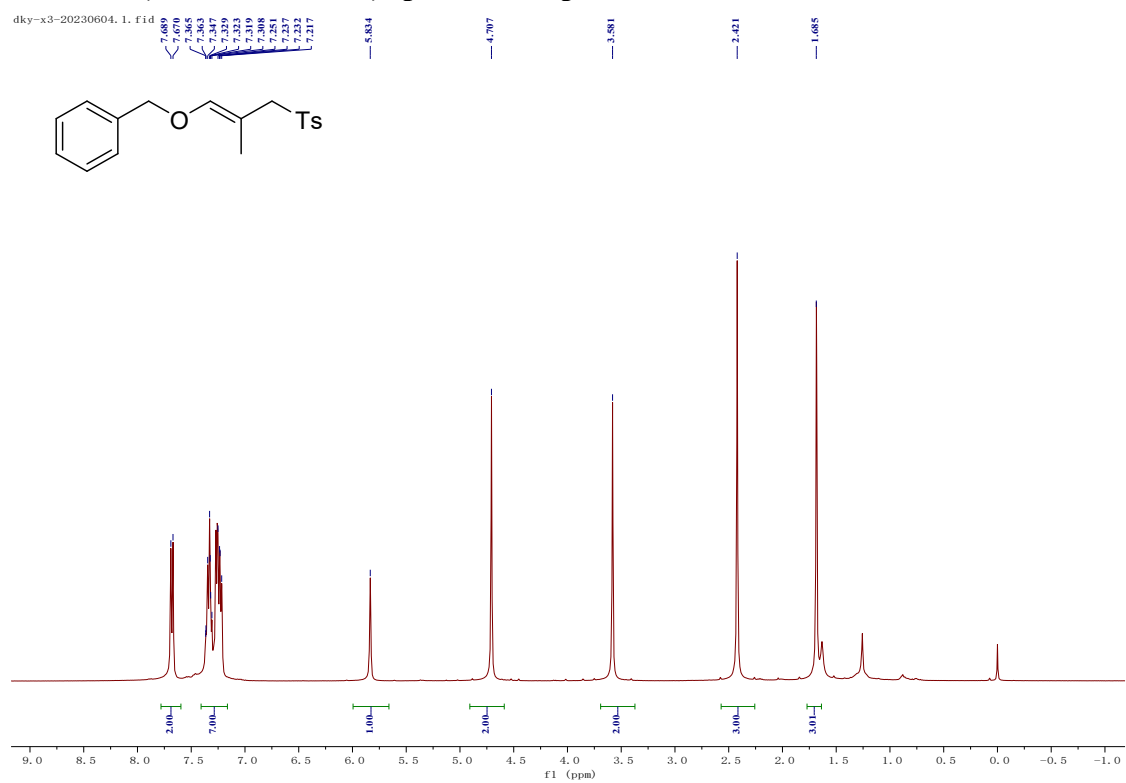

### <sup>13</sup>C NMR (400MHz, CDCl<sub>3</sub>) spectrum of product 3

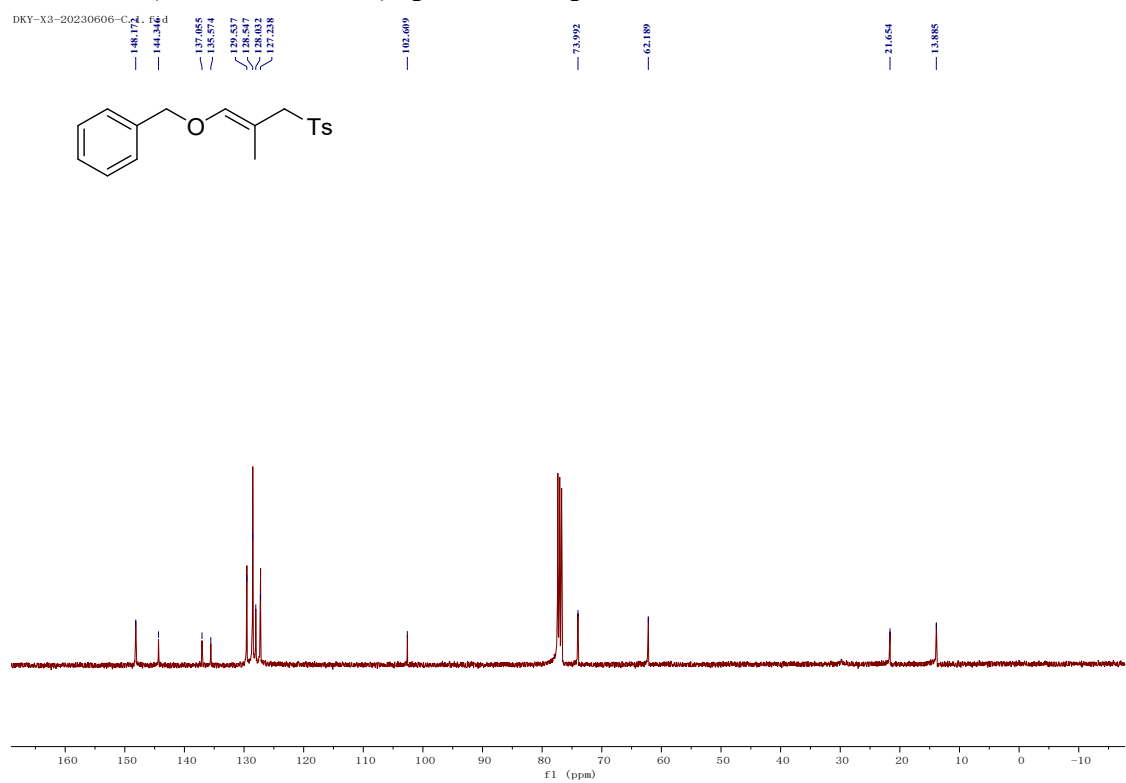

# <sup>1</sup>H NMR (400MHz, CDCl<sub>3</sub>) spectrum of product 4

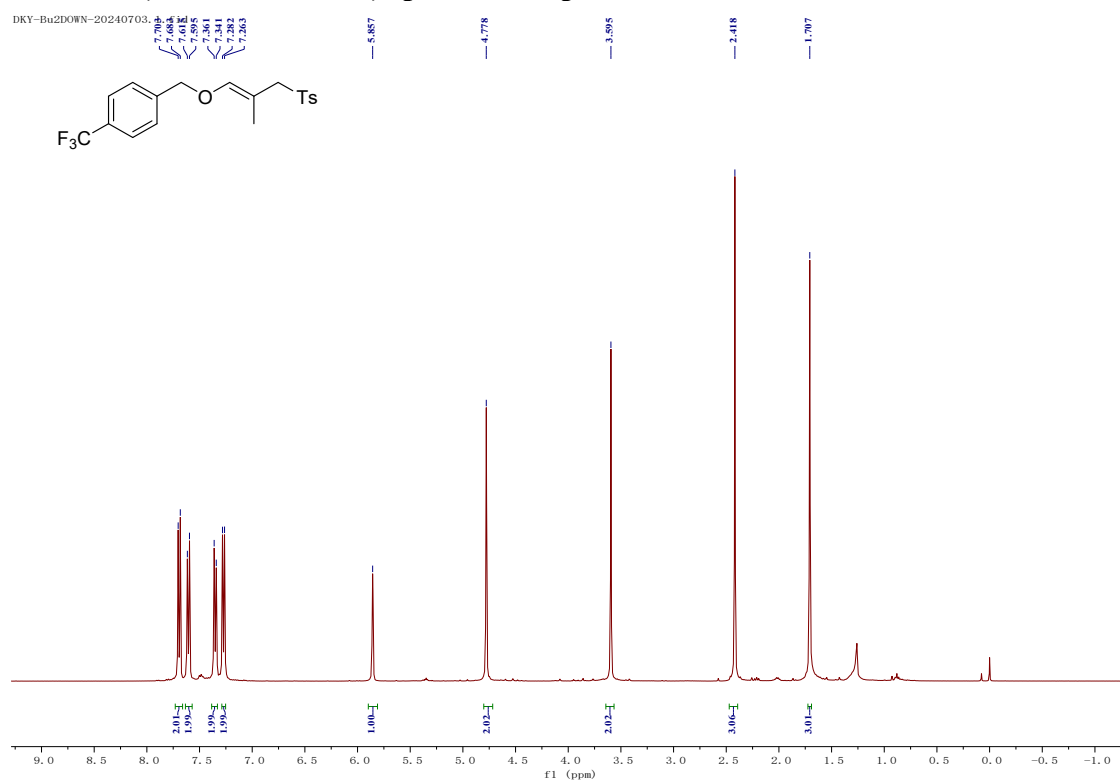

# <sup>19</sup>F NMR (376MHz, CDCl<sub>3</sub>) spectrum of product 4

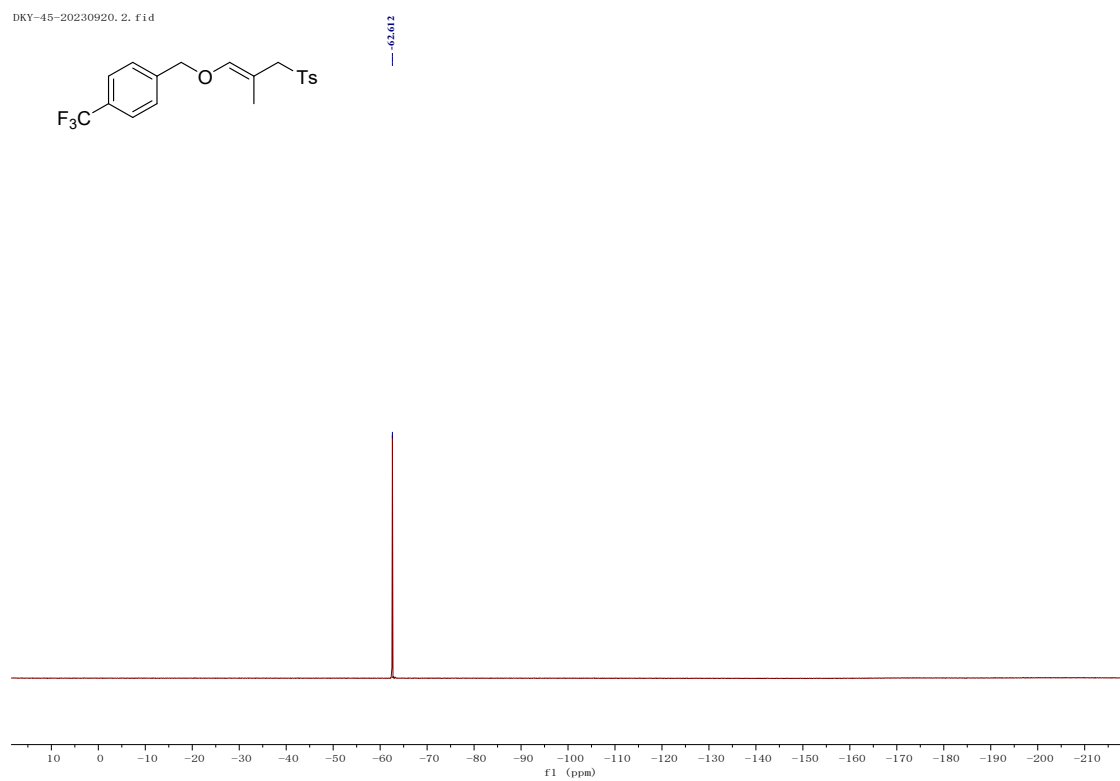



### $^{13}\text{C}$ NMR (400MHz, $\text{CDCl}_3$ ) spectrum of product 4

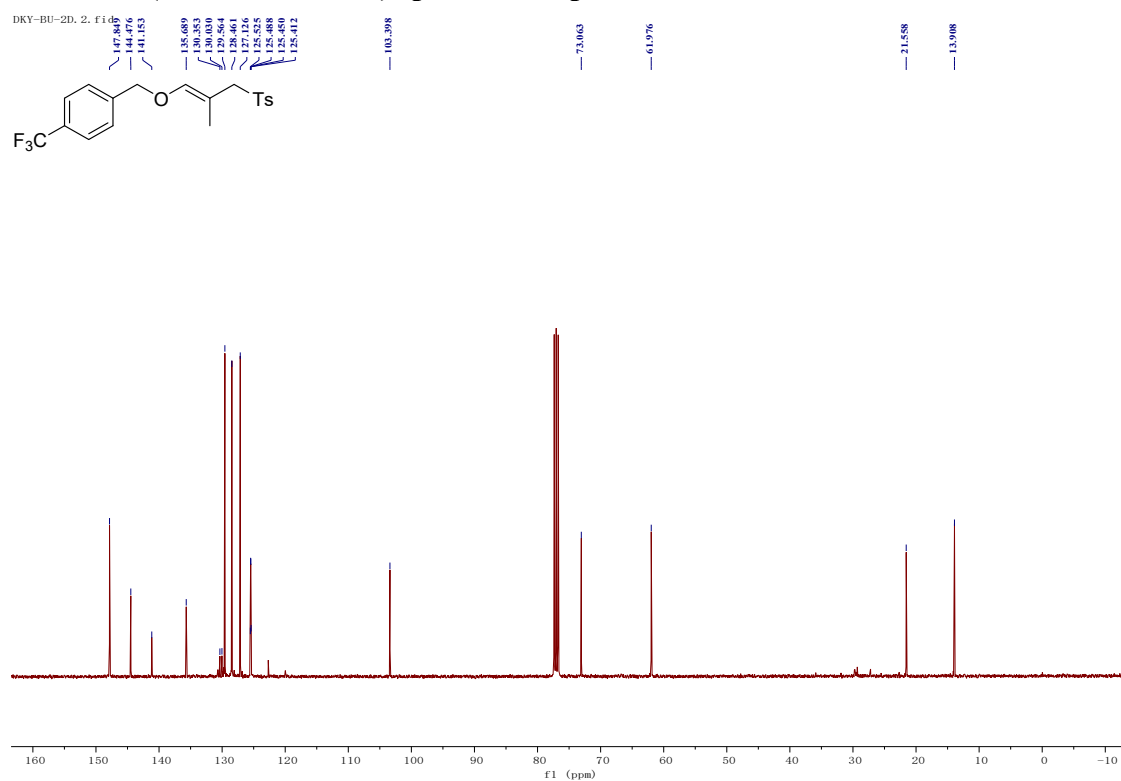

### NOE NMR (400MHz, $\text{CDCl}_3$ ) spectrum of product 4

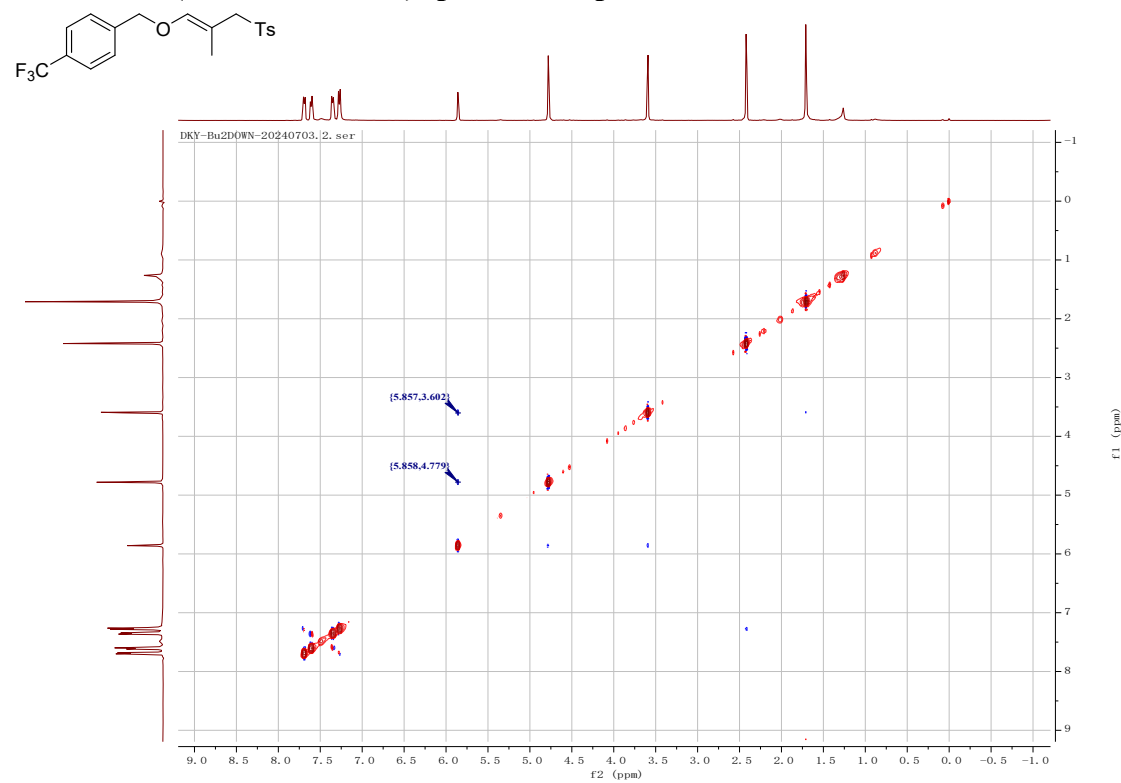

# <sup>1</sup>H NMR (400MHz, CDCl<sub>3</sub>) spectrum of product 5

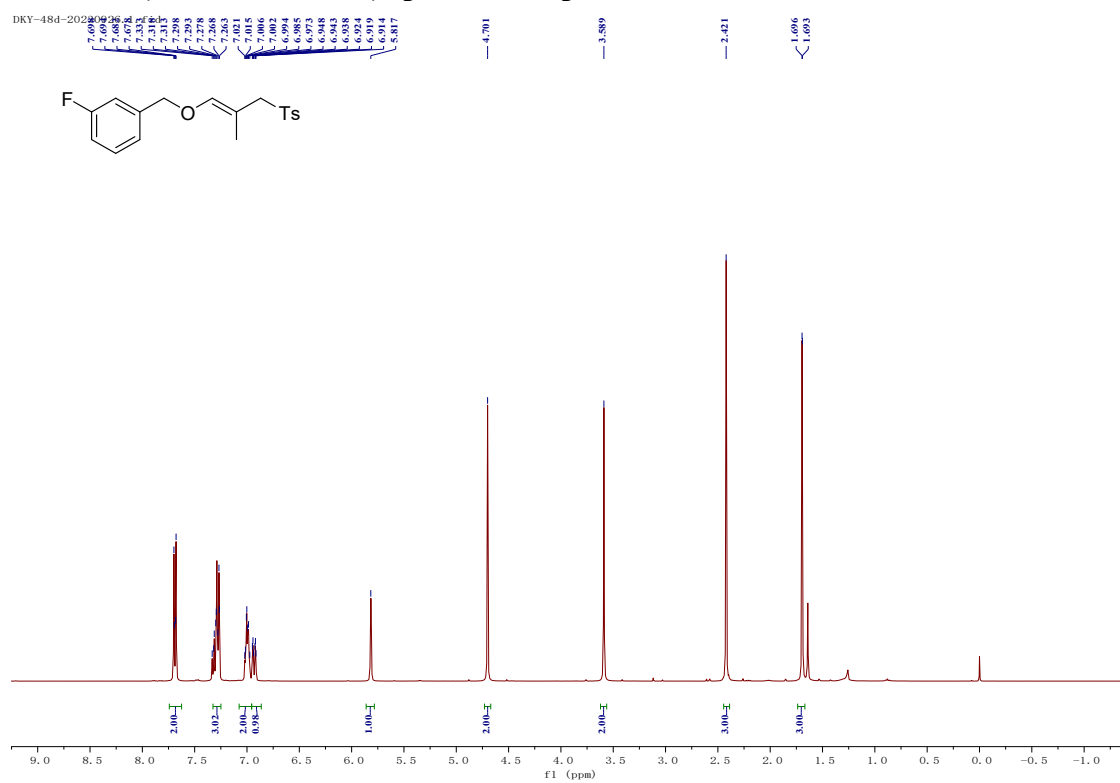

# <sup>19</sup>F NMR (376MHz, CDCl<sub>3</sub>) spectrum of product 5

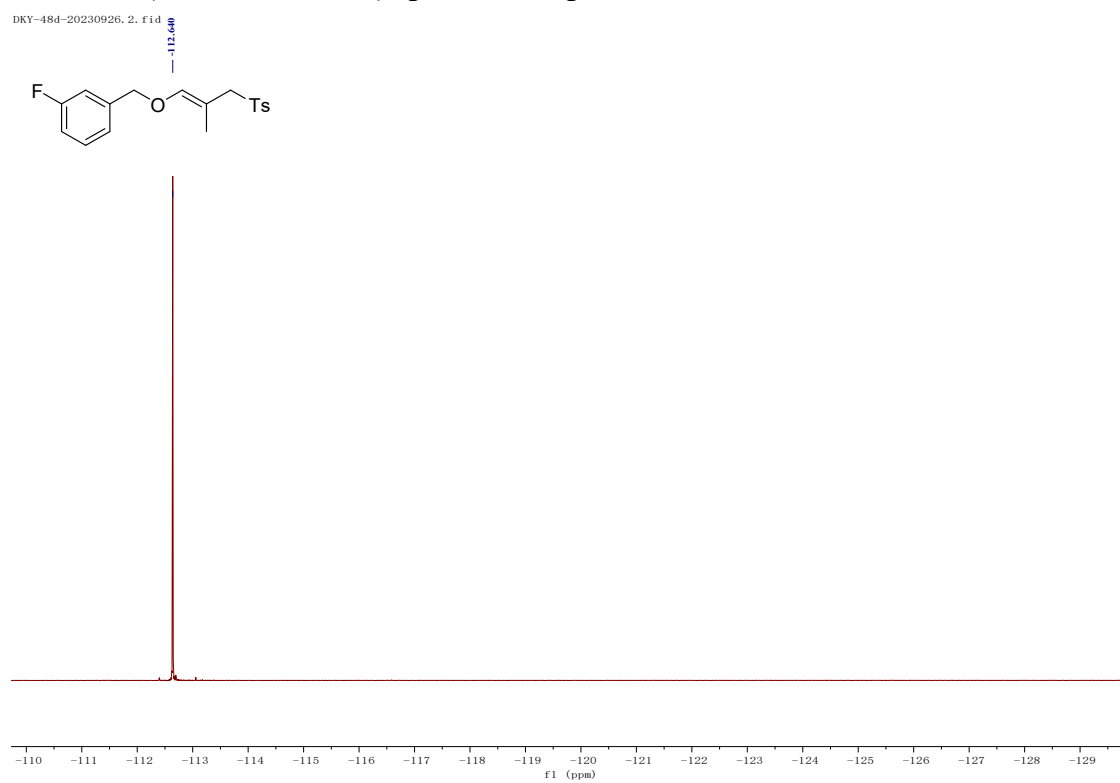

# <sup>13</sup>C NMR (400MHz, CDCl<sub>3</sub>) spectrum of product 5

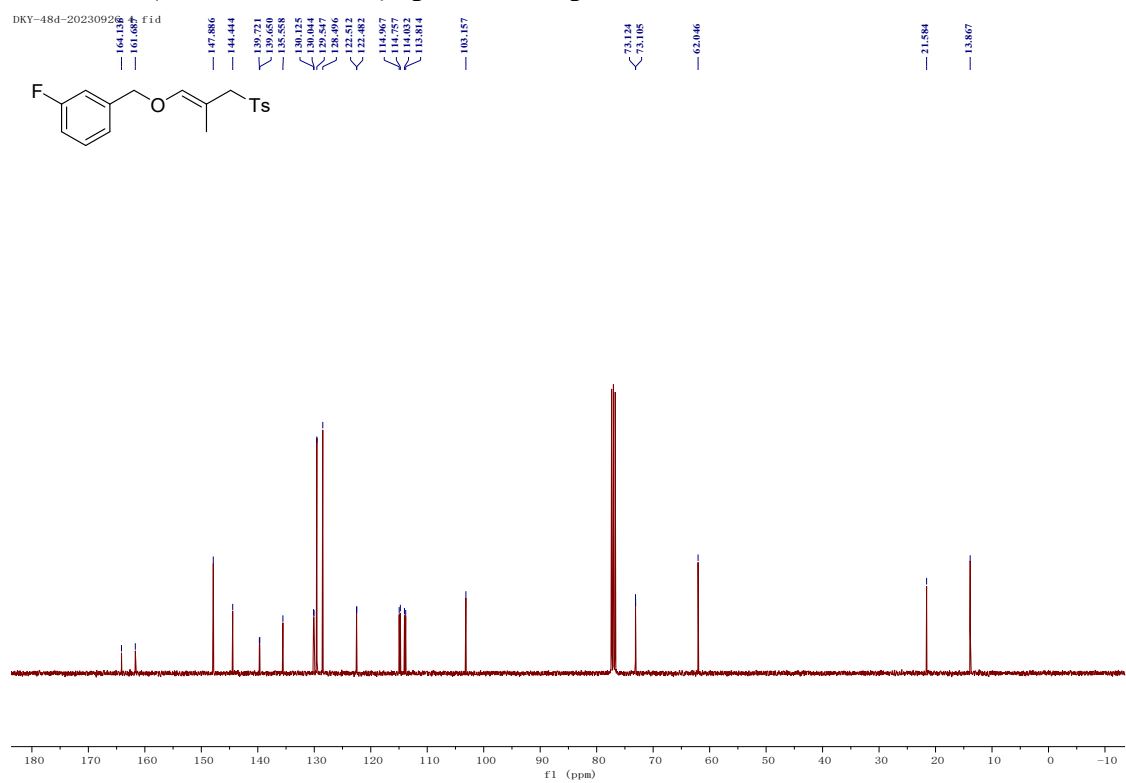

# <sup>1</sup>H NMR (400MHz, CDCl<sub>3</sub>) spectrum of product 6

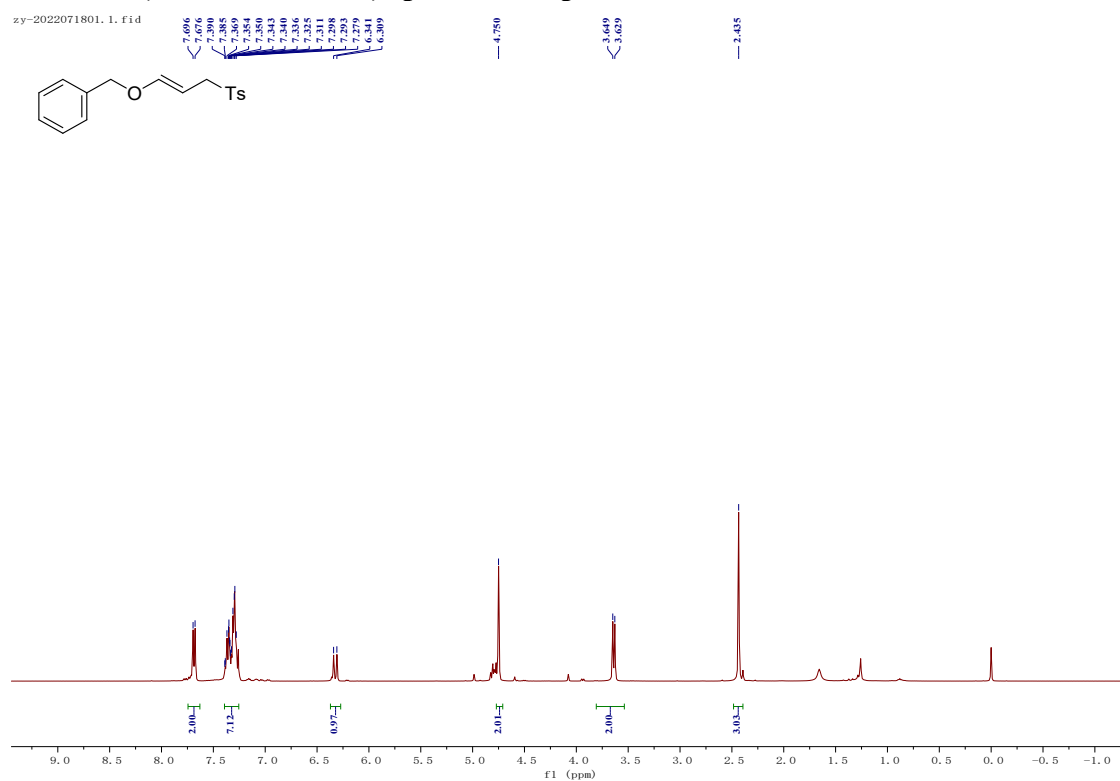

# <sup>13</sup>C NMR (400MHz, CDCl<sub>3</sub>) spectrum of product 6

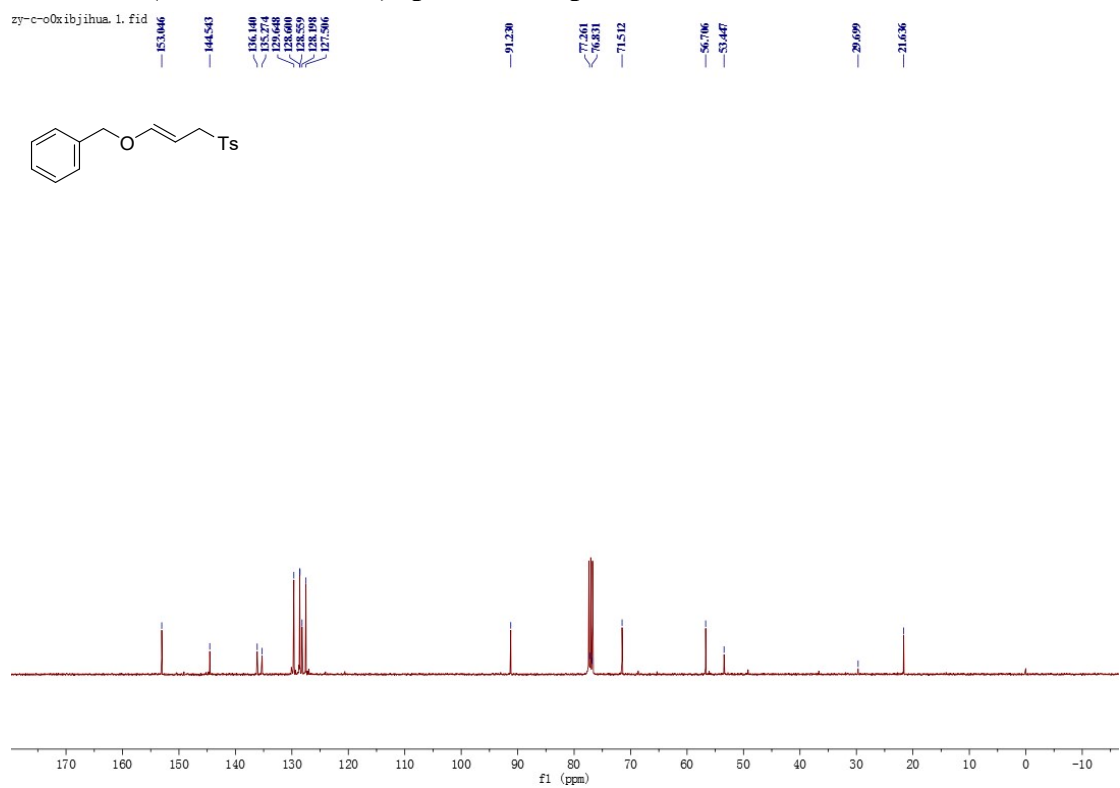



# NOE NMR (400MHz, CDCl<sub>3</sub>) spectrum of product 6

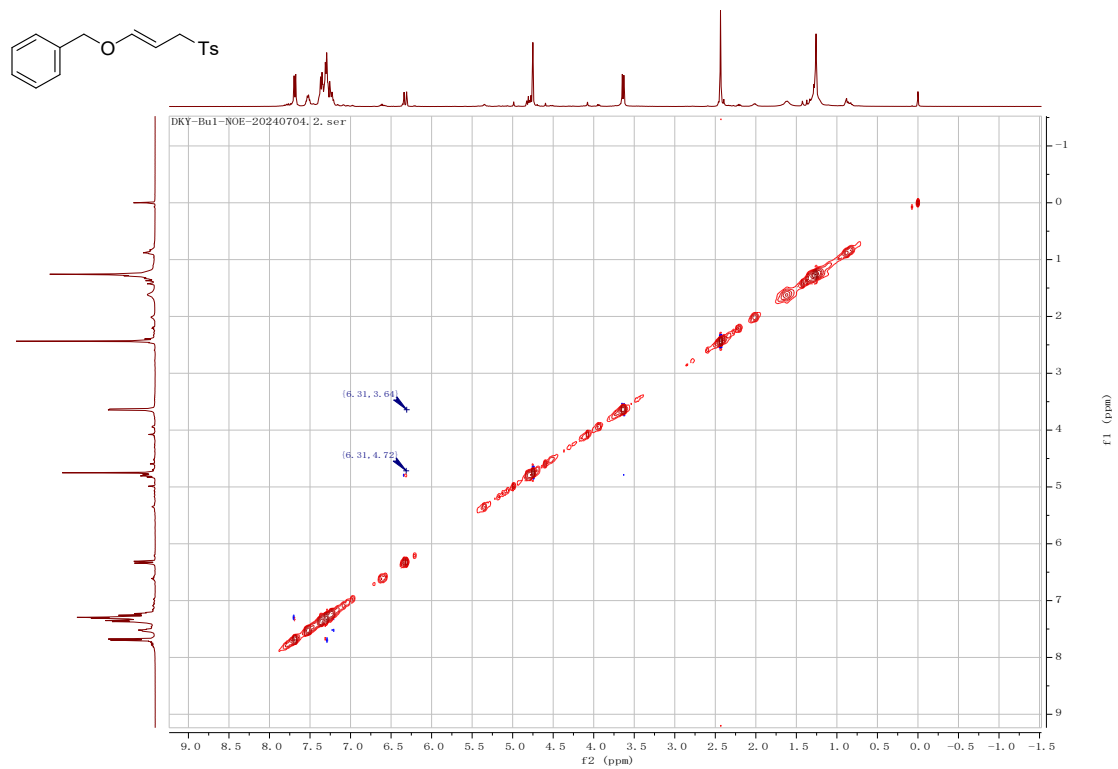

### <sup>1</sup>H NMR (400MHz, CDCl<sub>3</sub>) spectrum of product 7

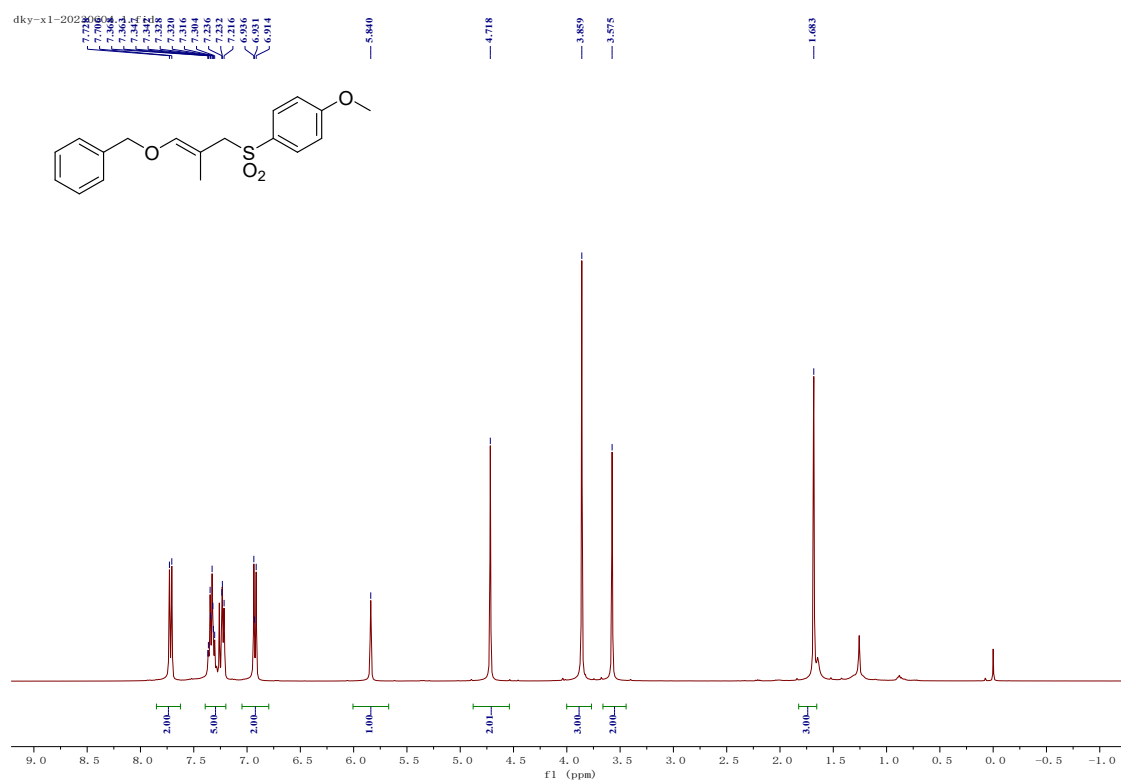

### <sup>13</sup>C NMR (400MHz, CDCl<sub>3</sub>) spectrum of product 7

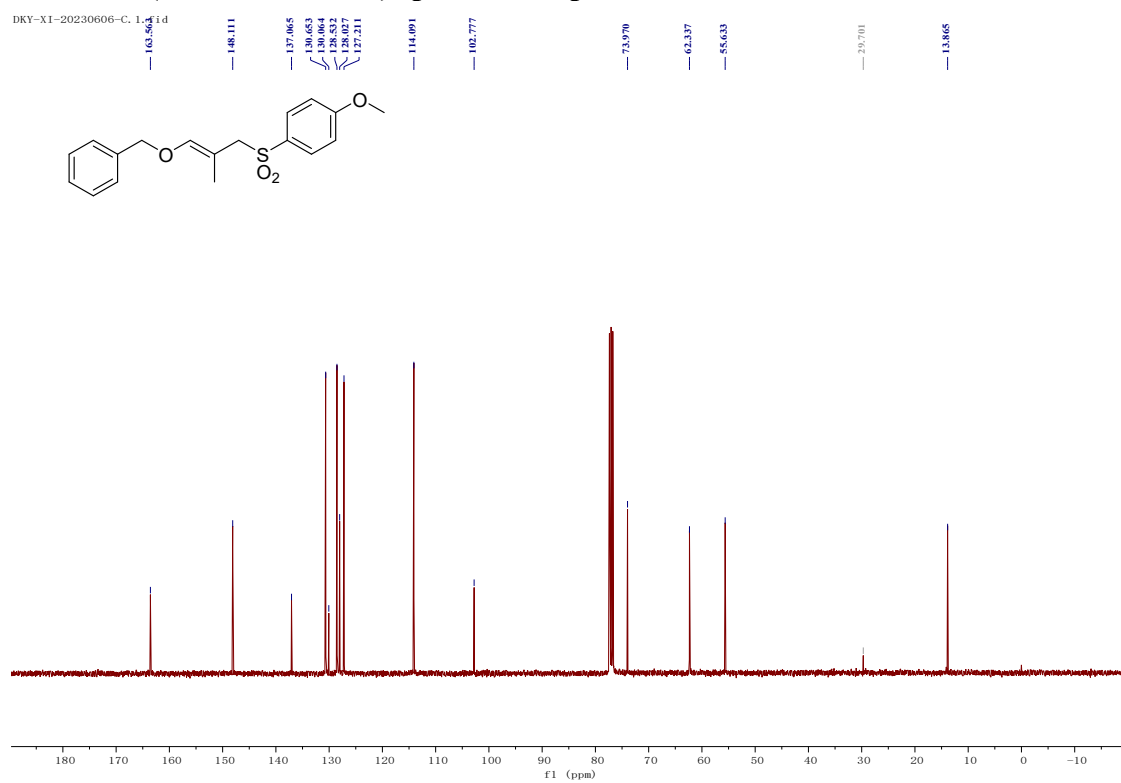

### <sup>1</sup>H NMR (400MHz, CDCl<sub>3</sub>) spectrum of product 8

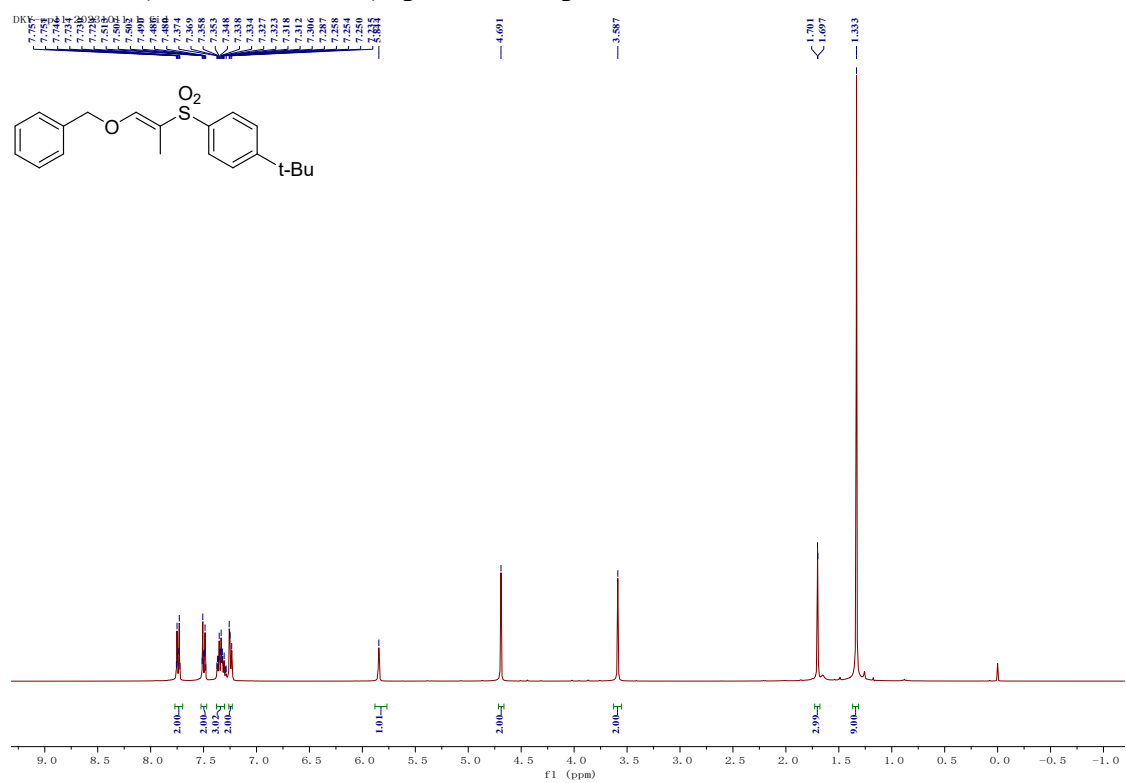

### <sup>13</sup>C NMR (400MHz, CDCl<sub>3</sub>) spectrum of product 8

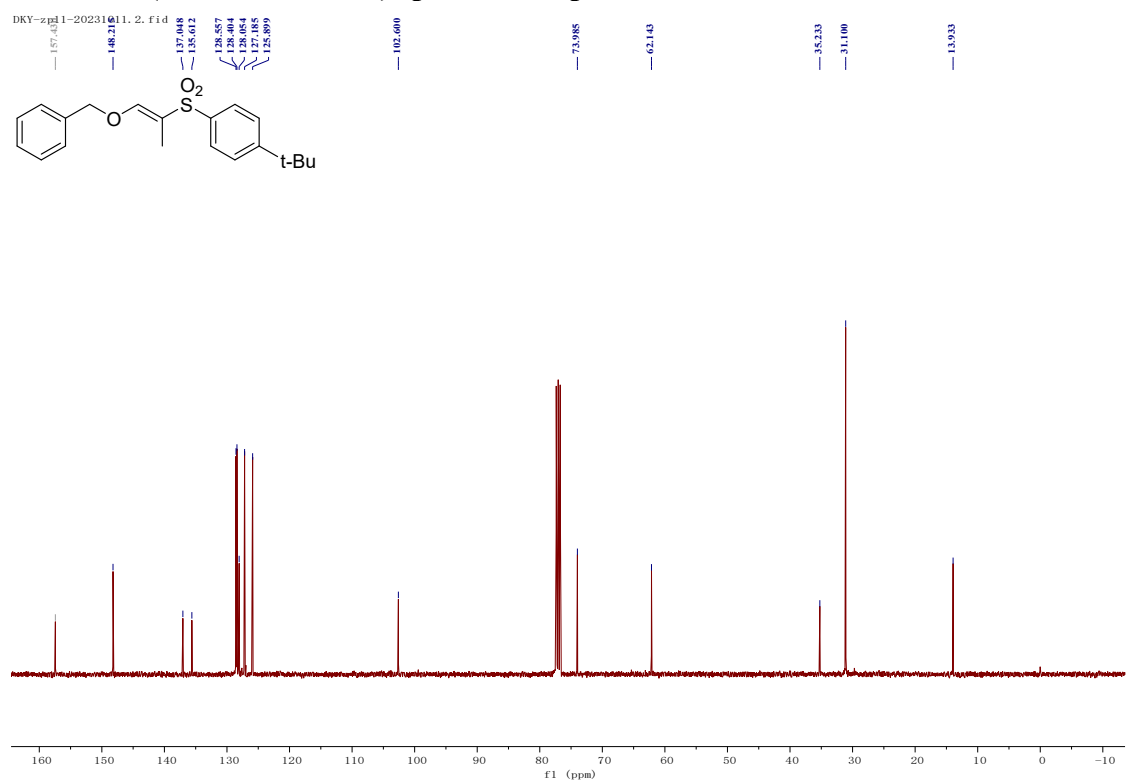



# $^1\text{H}$ NMR (400MHz, $\text{CDCl}_3$ ) spectrum of product 9

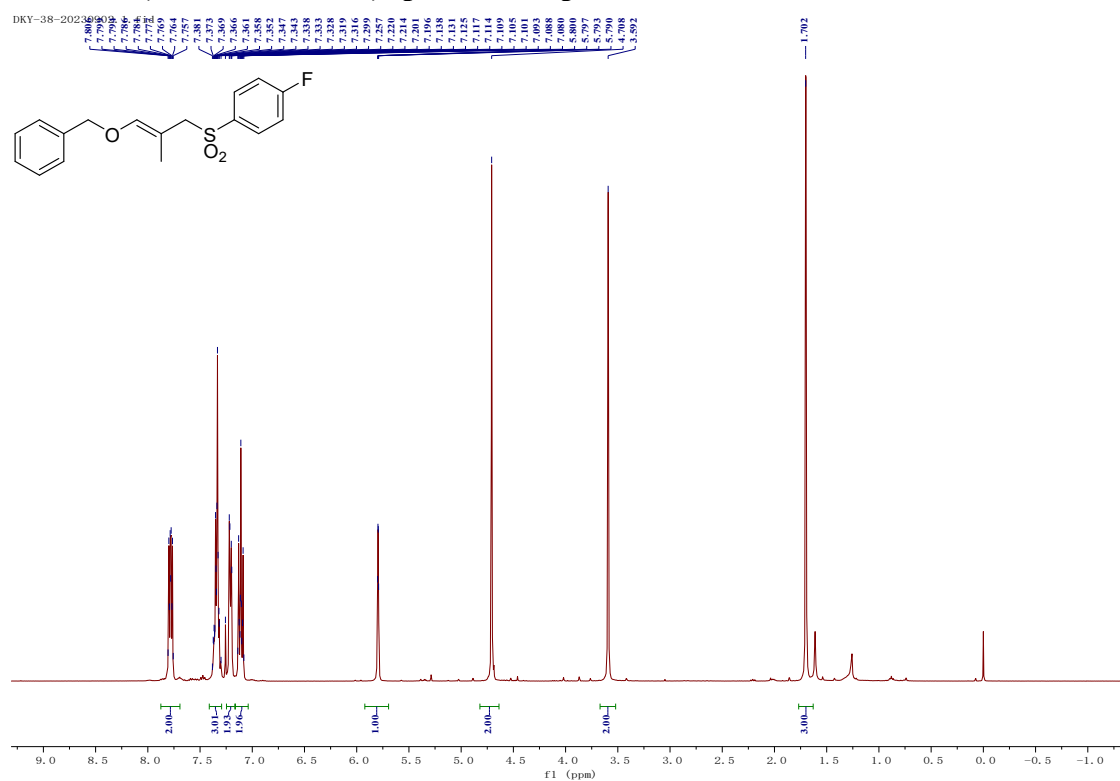

# $^{19}\text{F}$ NMR (376MHz, $\text{CDCl}_3$ ) spectrum of product 9

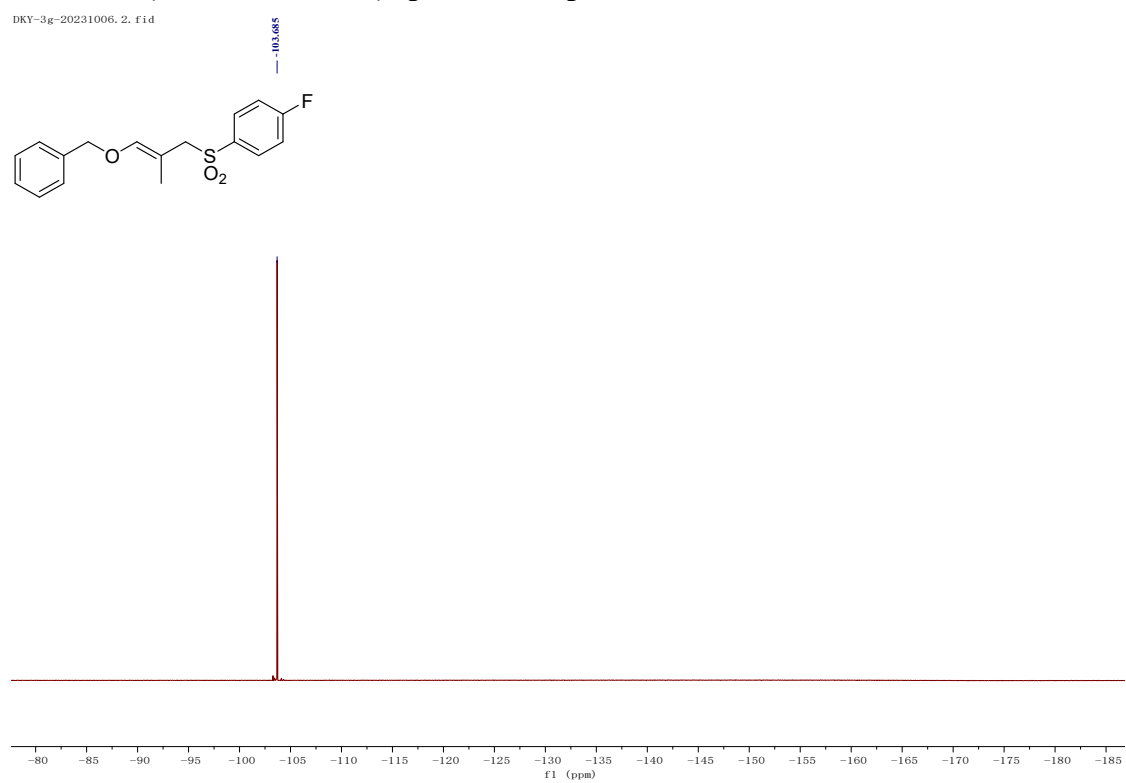

# <sup>13</sup>C NMR (400MHz, CDCl<sub>3</sub>) spectrum of product 9

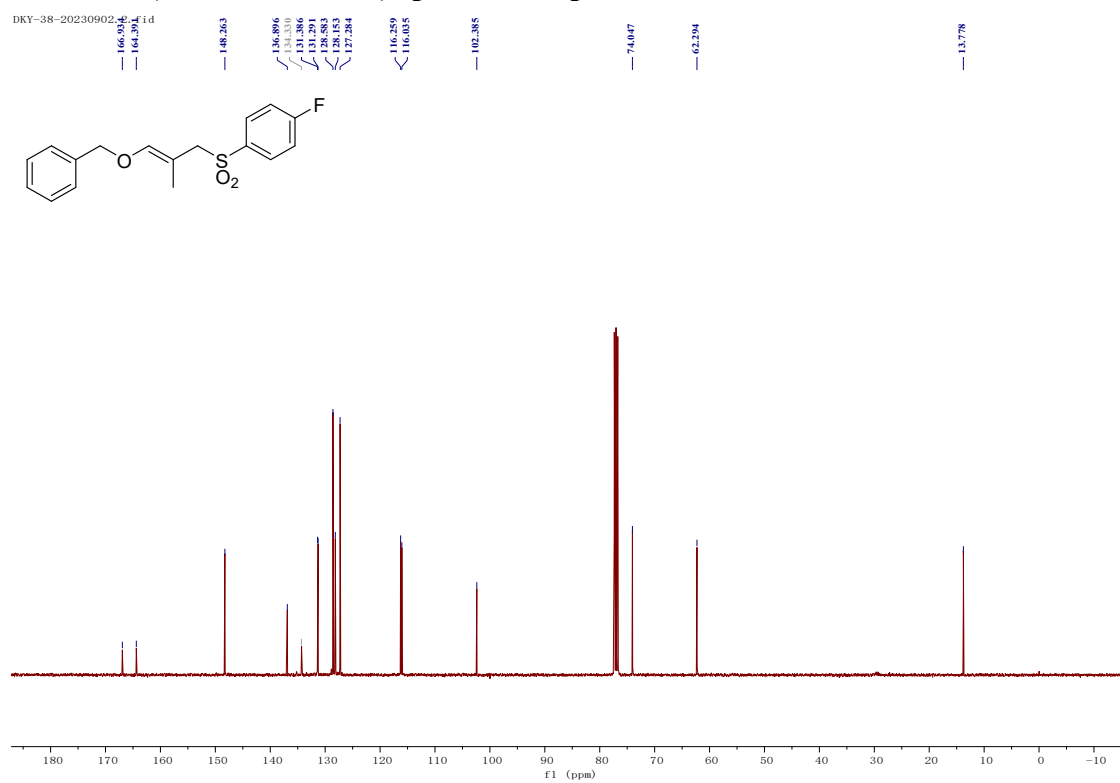

# <sup>1</sup>H NMR (400MHz, CDCl<sub>3</sub>) spectrum of product 10

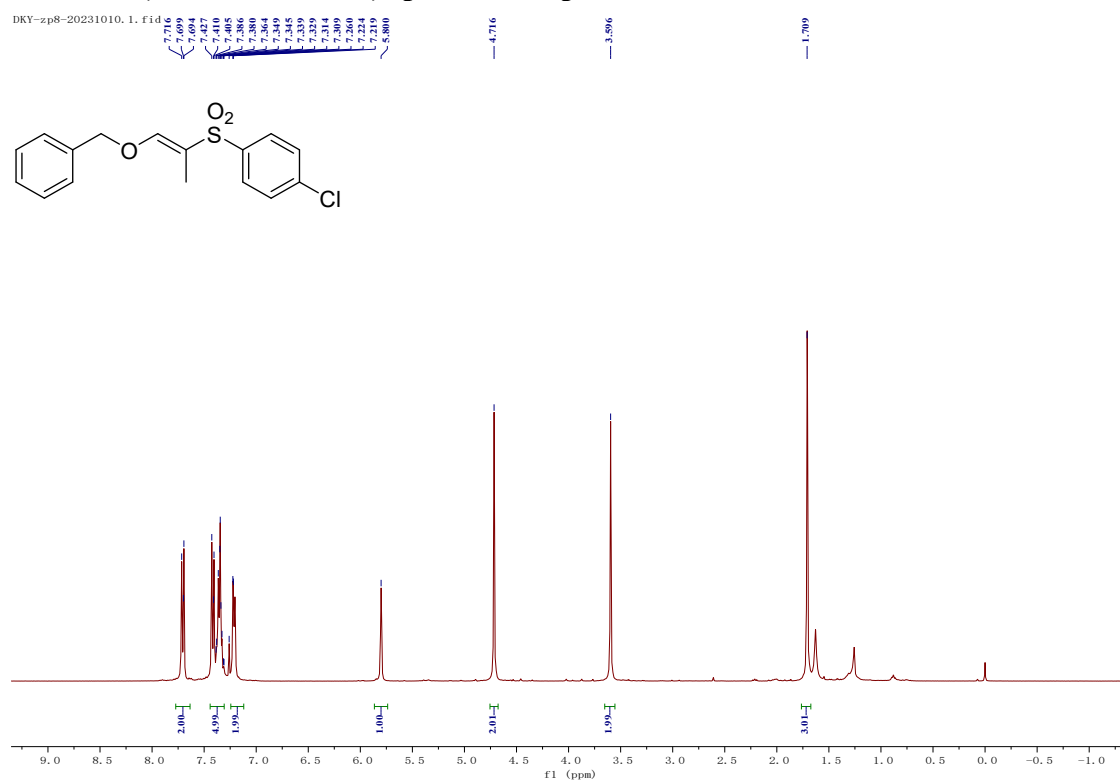

# <sup>13</sup>C NMR (400MHz, CDCl<sub>3</sub>) spectrum of product 10

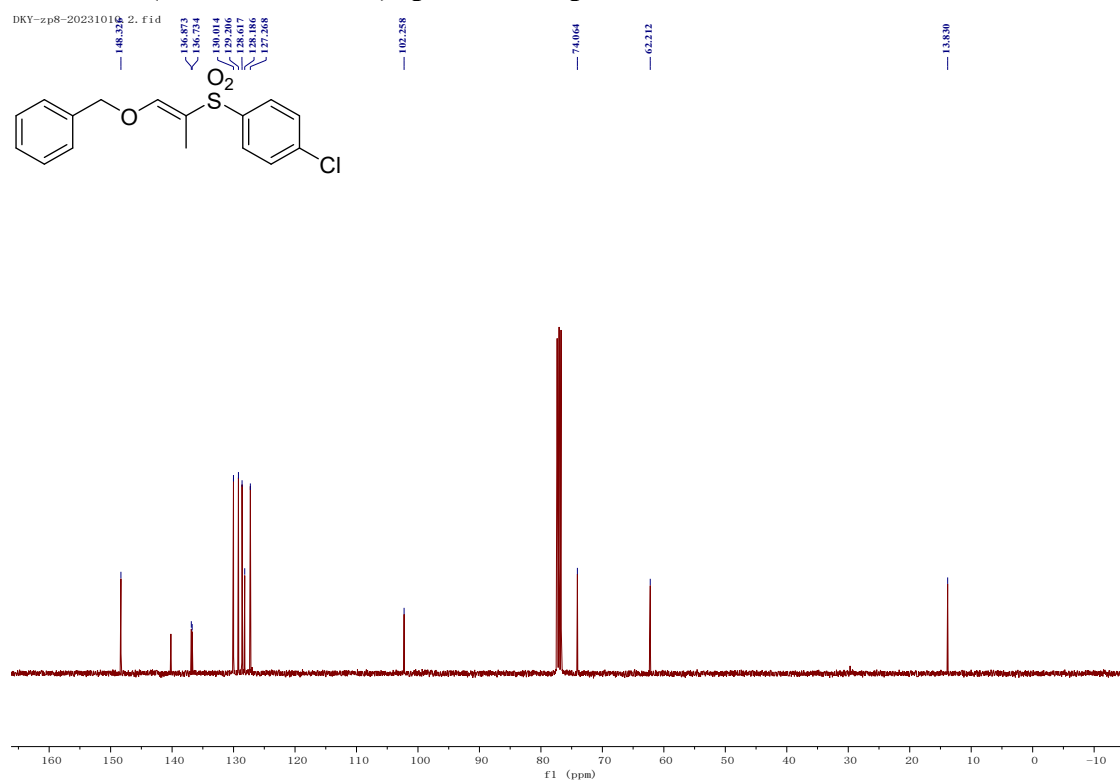

# <sup>1</sup>H NMR (400MHz, Acetone-*d*<sub>6</sub>) spectrum of product 11

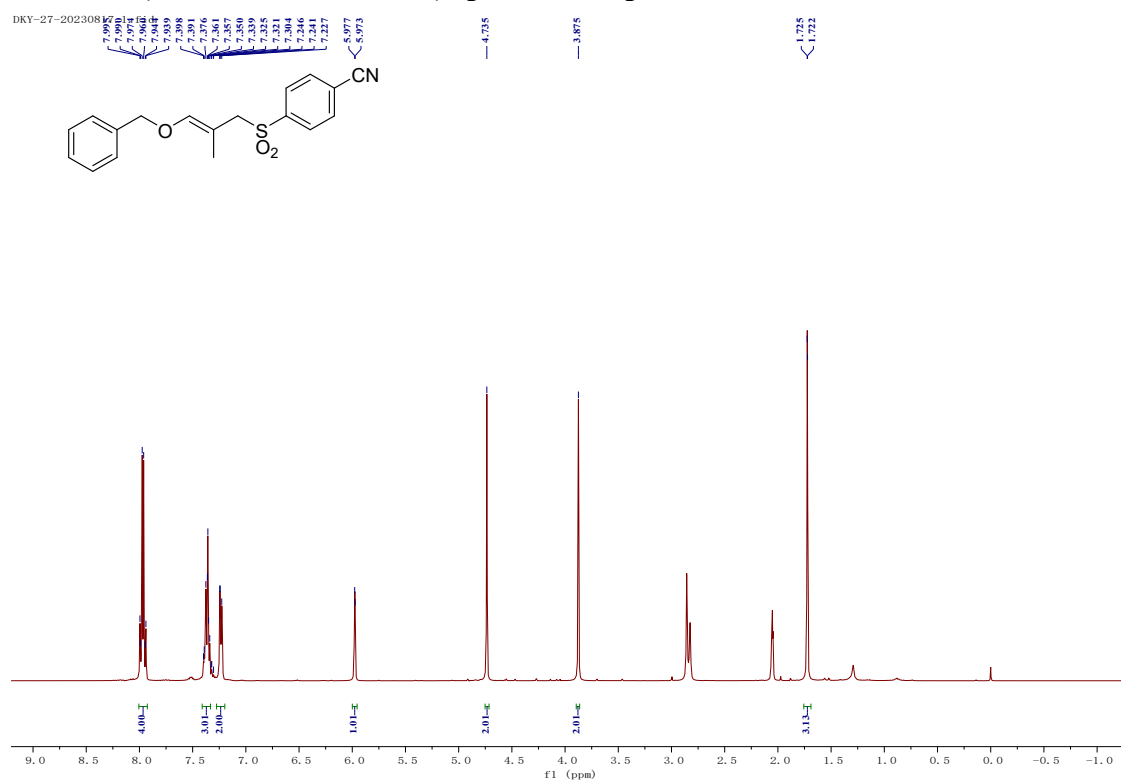

# <sup>13</sup>C NMR (400MHz, Acetone-*d*<sub>6</sub>) spectrum of product 11

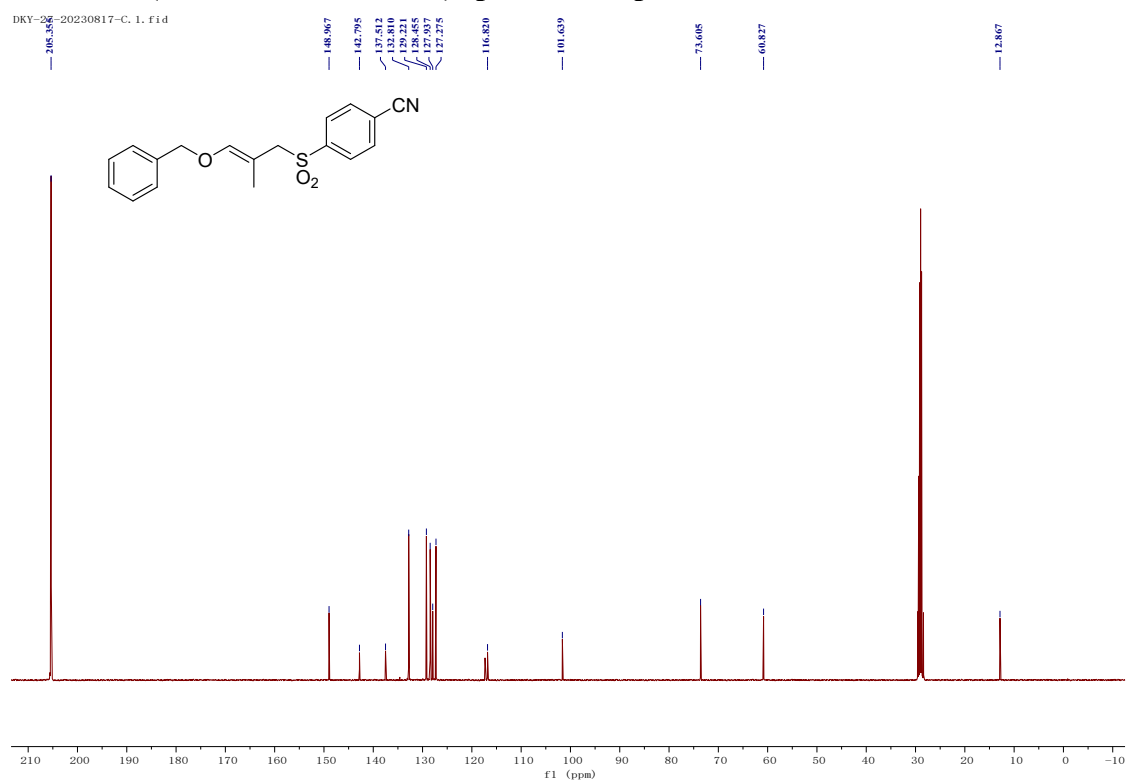

# <sup>1</sup>H NMR (400MHz, Acetone-d<sub>6</sub>) spectrum of product 12

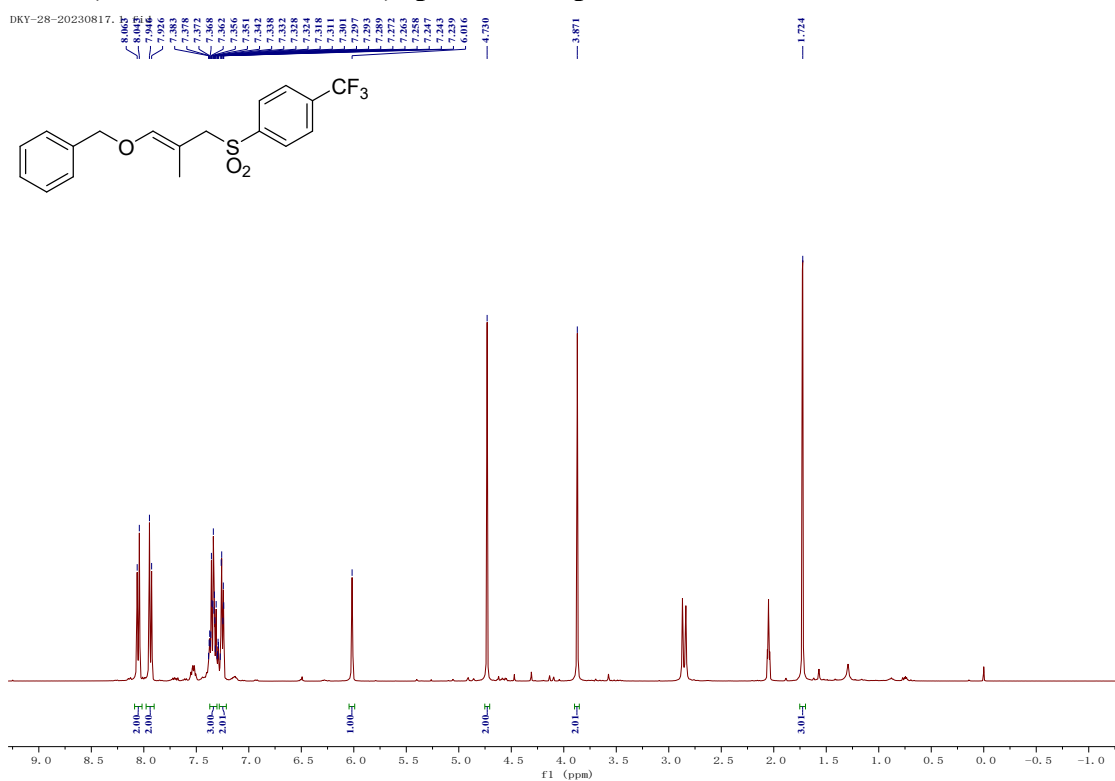

# <sup>19</sup>F NMR (376MHz, Acetone-d<sub>6</sub>) spectrum of product 12

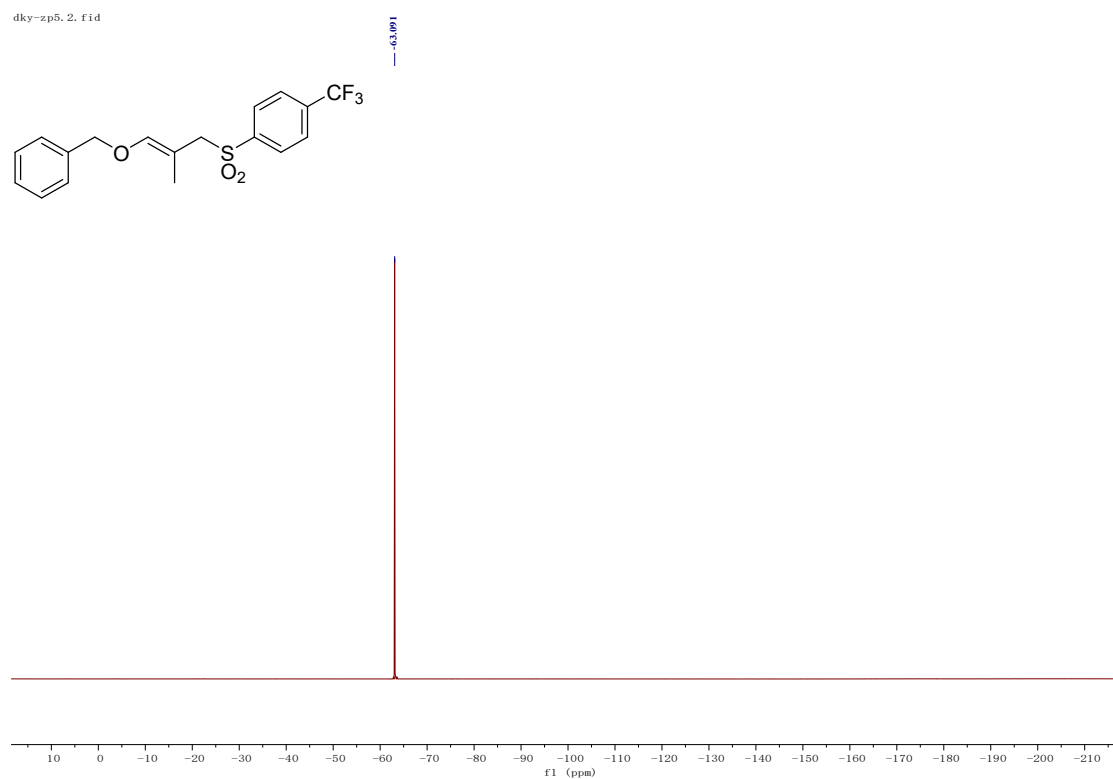

# <sup>13</sup>C NMR (400MHz, Acetone-*d*<sub>6</sub>) spectrum of product 12

DKY-28-80817-C. 1. F1d

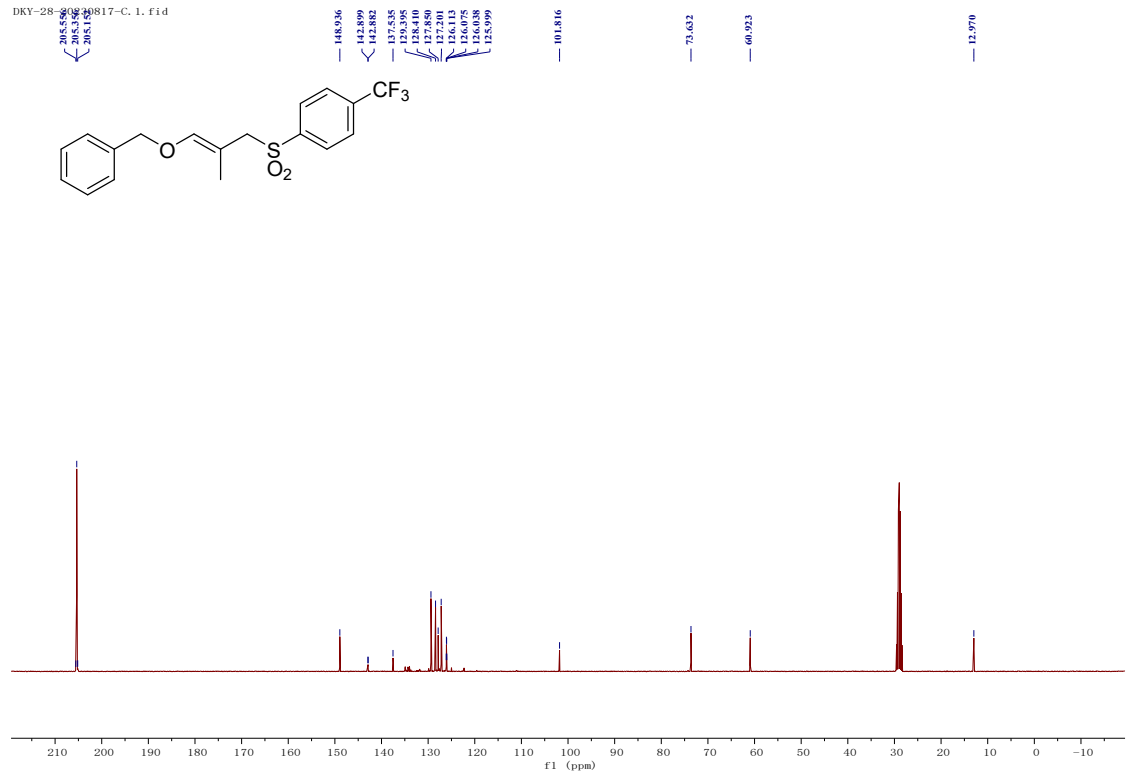

### <sup>1</sup>H NMR (400MHz, CDCl<sub>3</sub>) spectrum of product 13

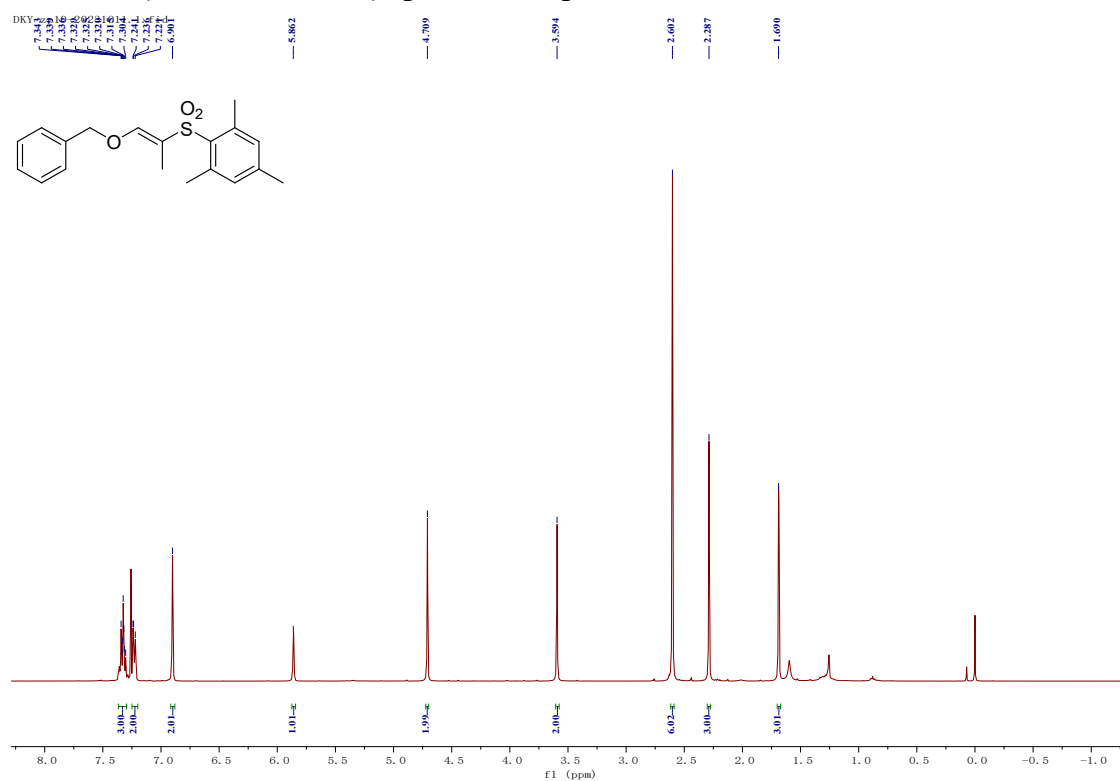

### <sup>13</sup>C NMR (400MHz, CDCl<sub>3</sub>) spectrum of product 13

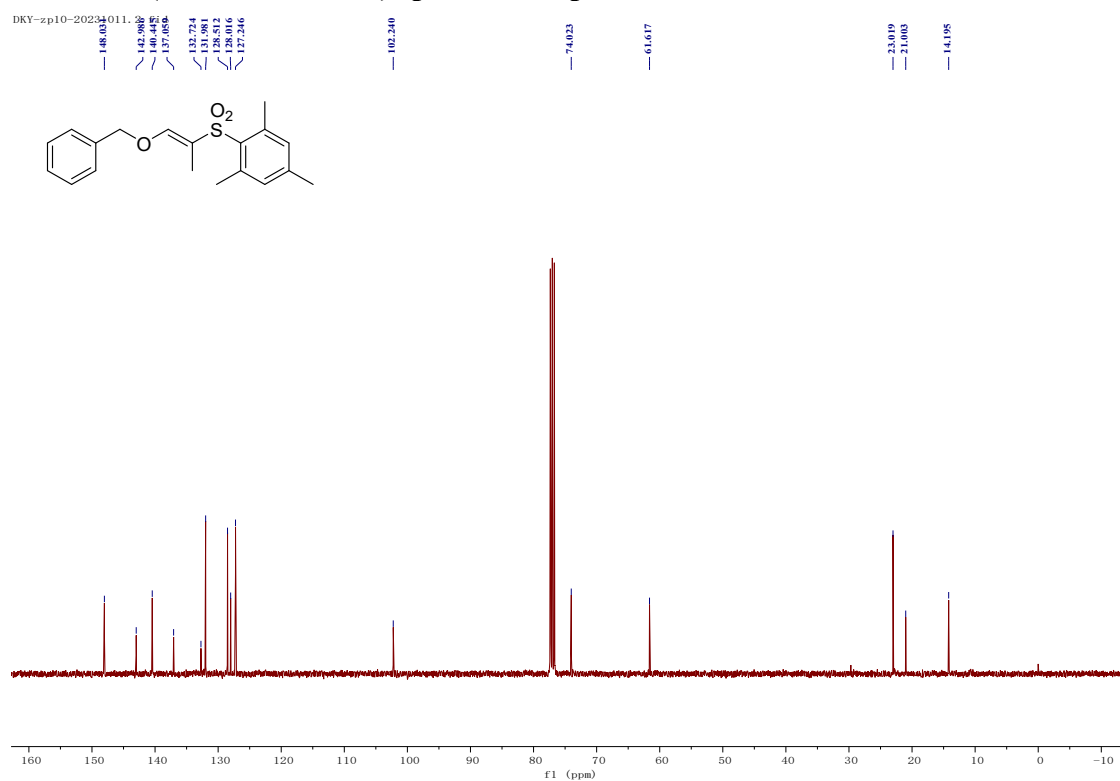

### $^1\text{H}$ NMR (400MHz, $\text{CDCl}_3$ ) spectrum of product 15

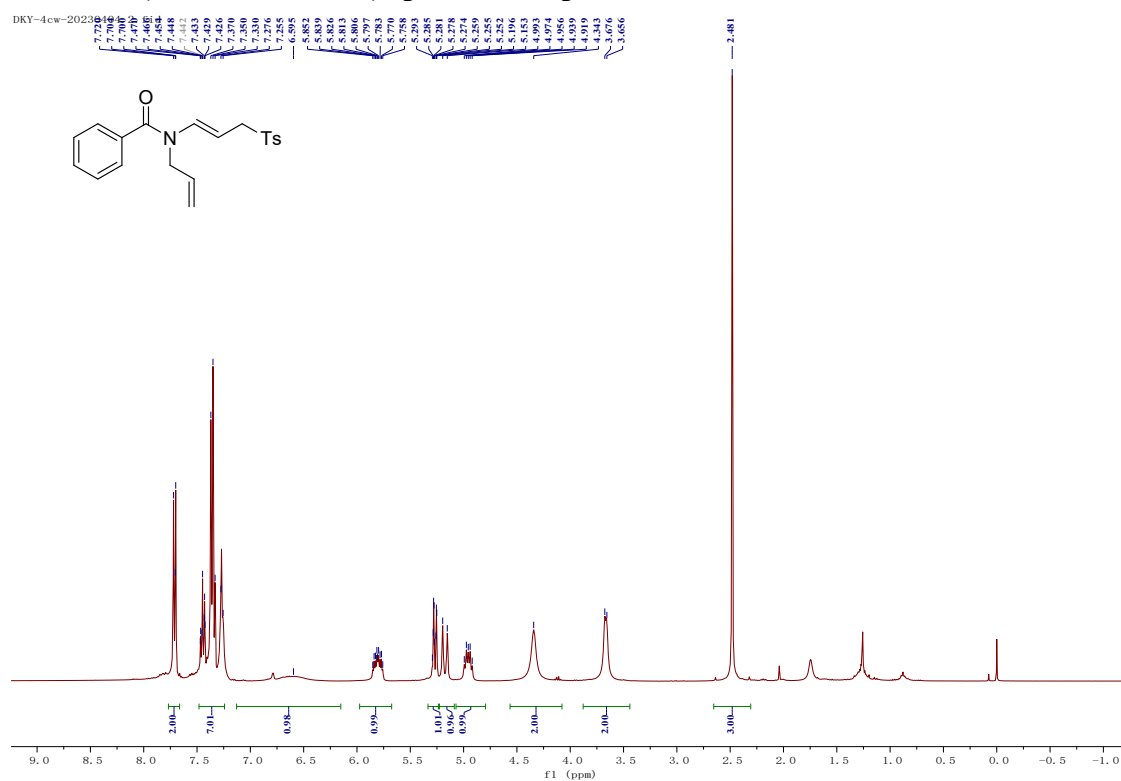

### $^{13}\text{C}$ NMR (400MHz, $\text{CDCl}_3$ ) spectrum of product 15

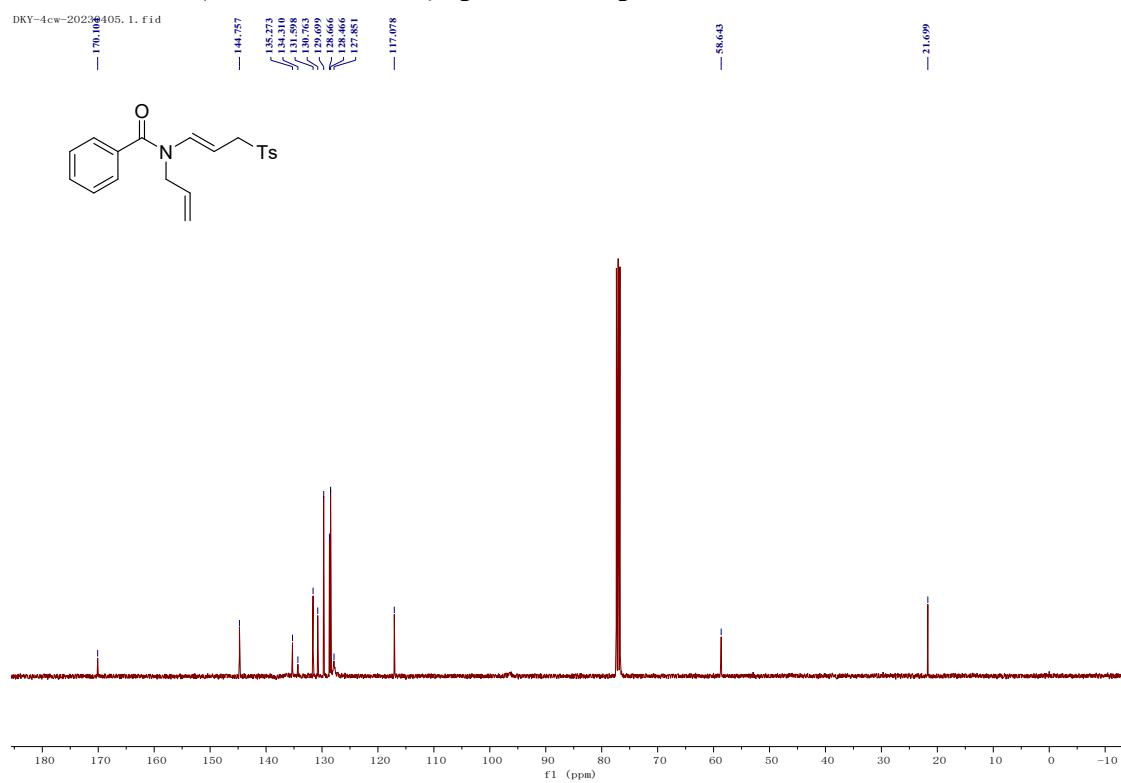



# <sup>1</sup>H NMR (400MHz, CDCl<sub>3</sub>) spectrum of product 16

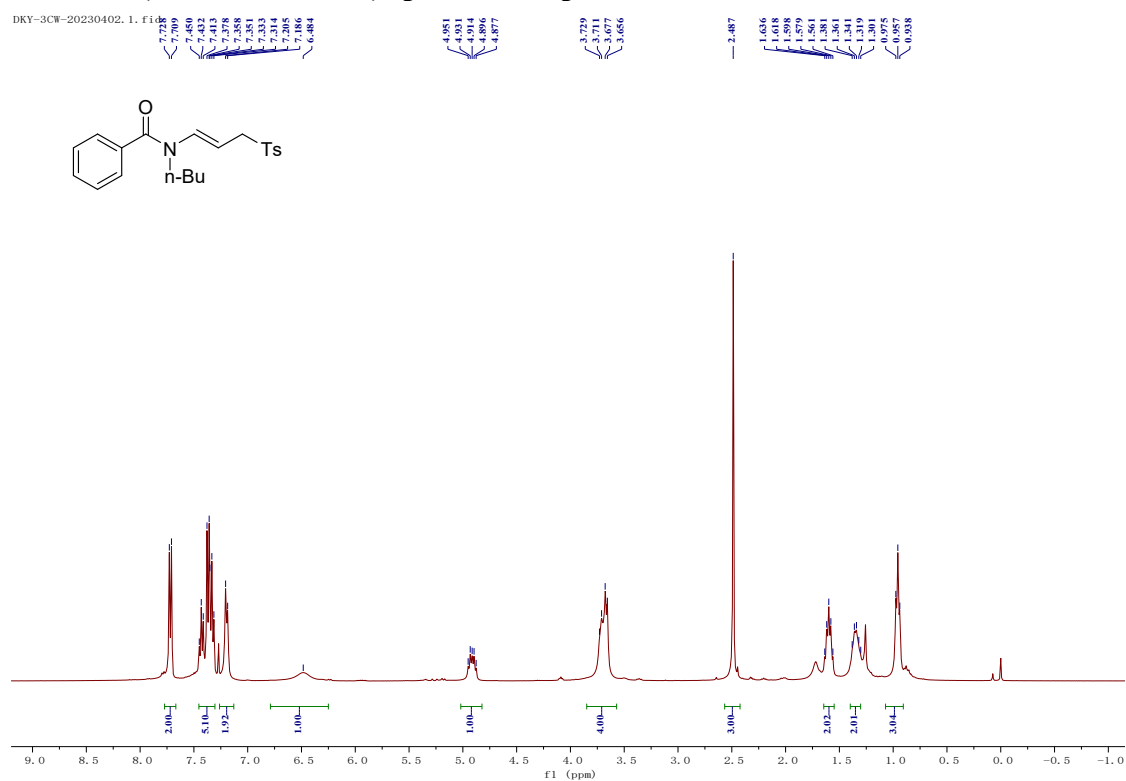

# <sup>13</sup>C NMR (400MHz, CDCl<sub>3</sub>) spectrum of product 16

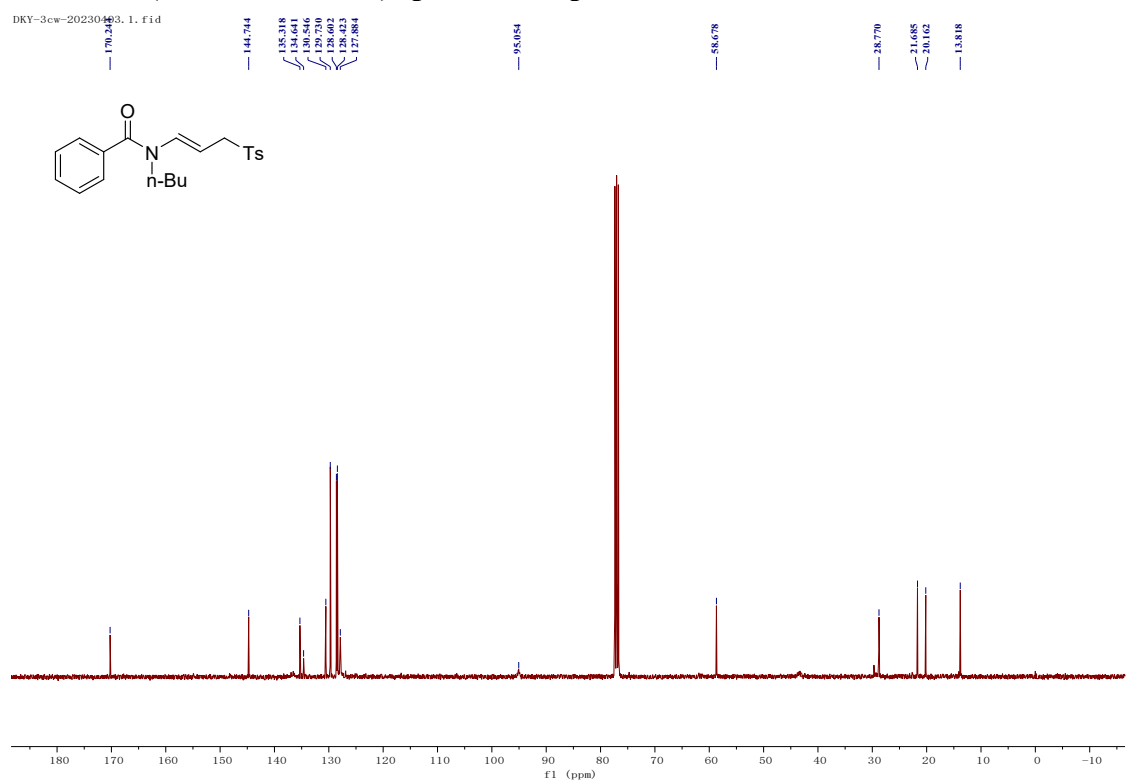

# <sup>1</sup>H NMR (400MHz, CDCl<sub>3</sub>) spectrum of product 17

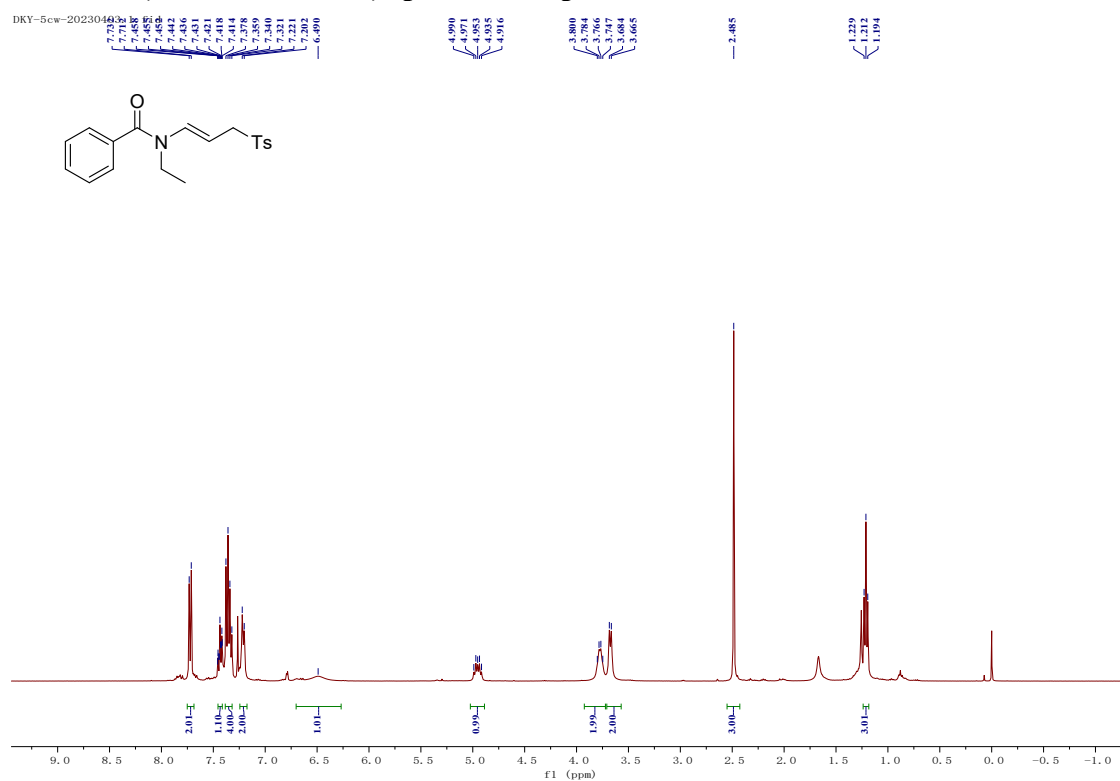

# <sup>13</sup>C NMR (400MHz, CDCl<sub>3</sub>) spectrum of product 17

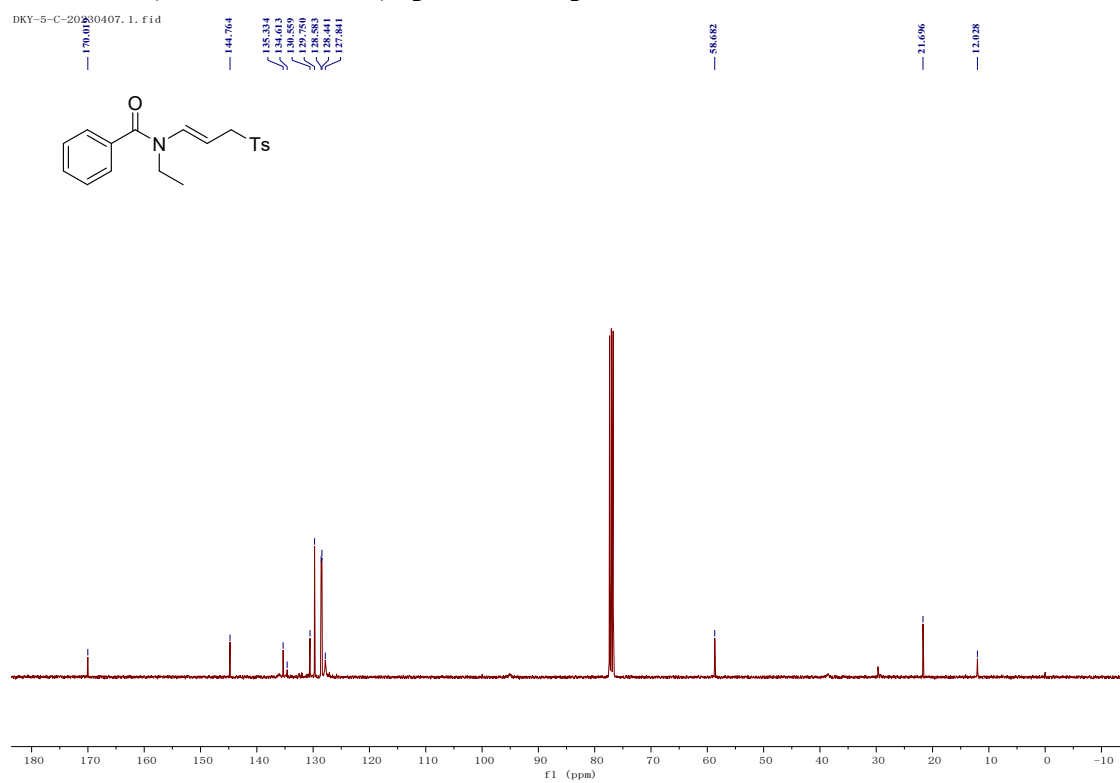

# <sup>1</sup>H NMR (400MHz, CDCl<sub>3</sub>) spectrum of product 18

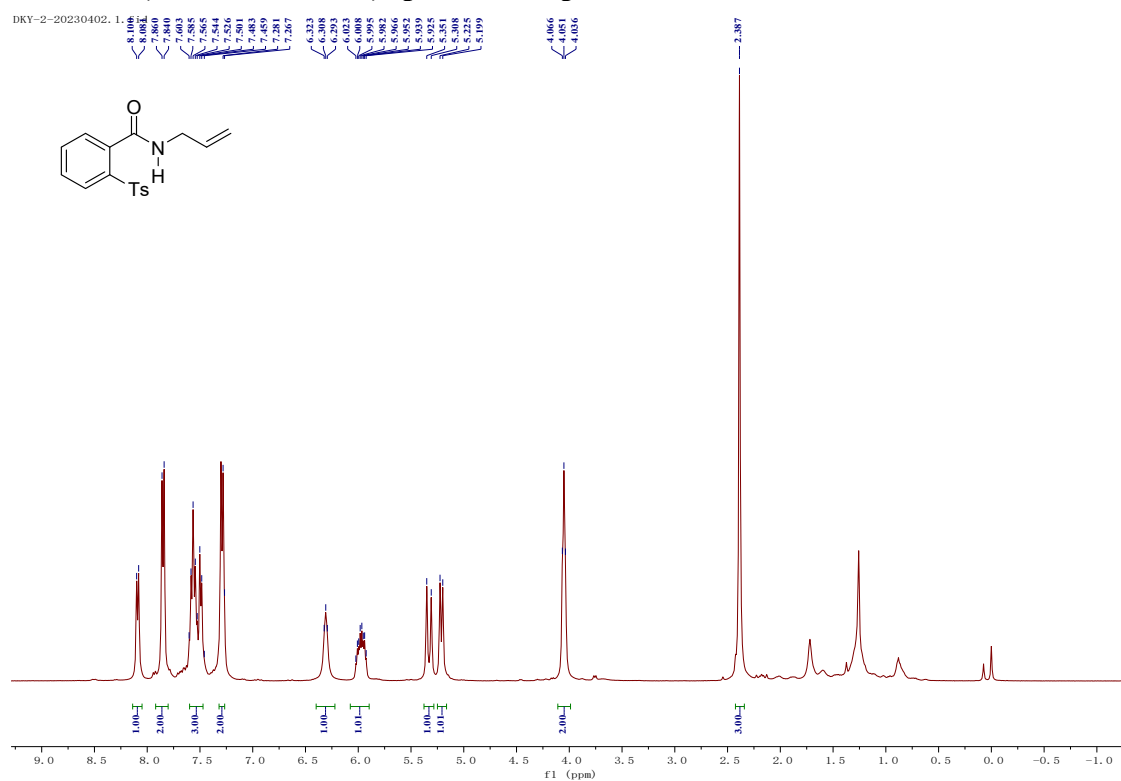

# <sup>13</sup>C NMR (400MHz, CDCl<sub>3</sub>) spectrum of product 18

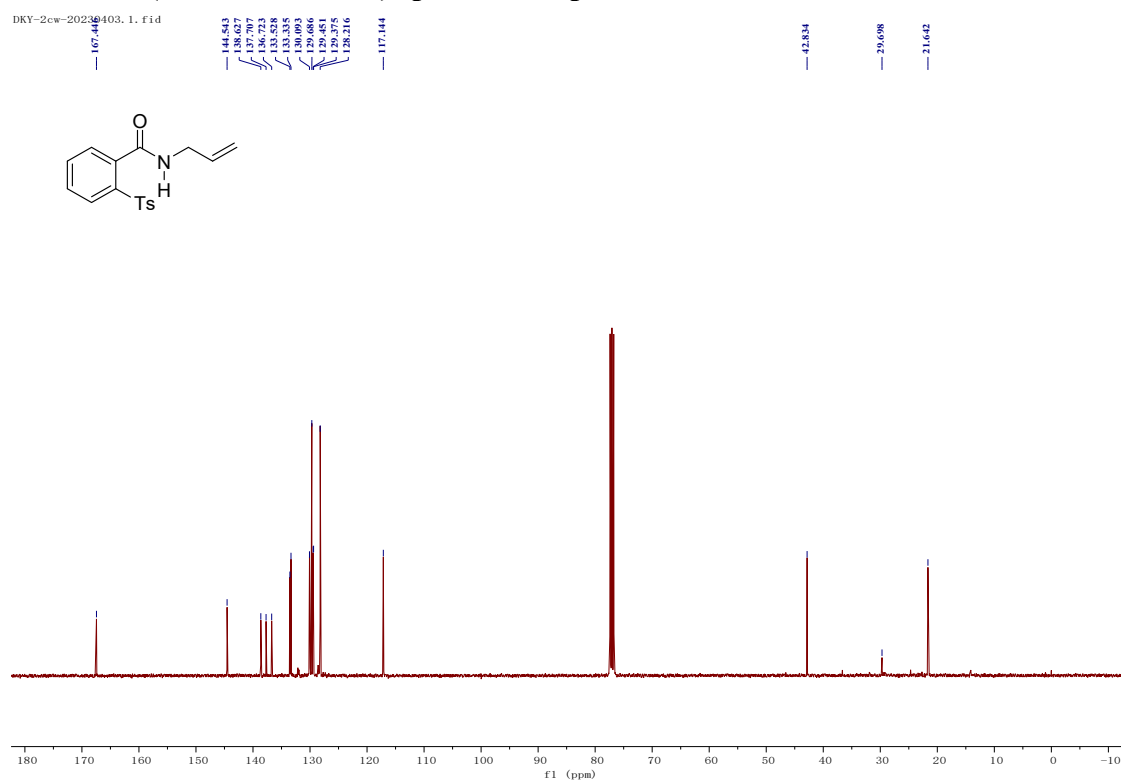

# <sup>1</sup>H NMR (400MHz, CDCl<sub>3</sub>) spectrum of product 19

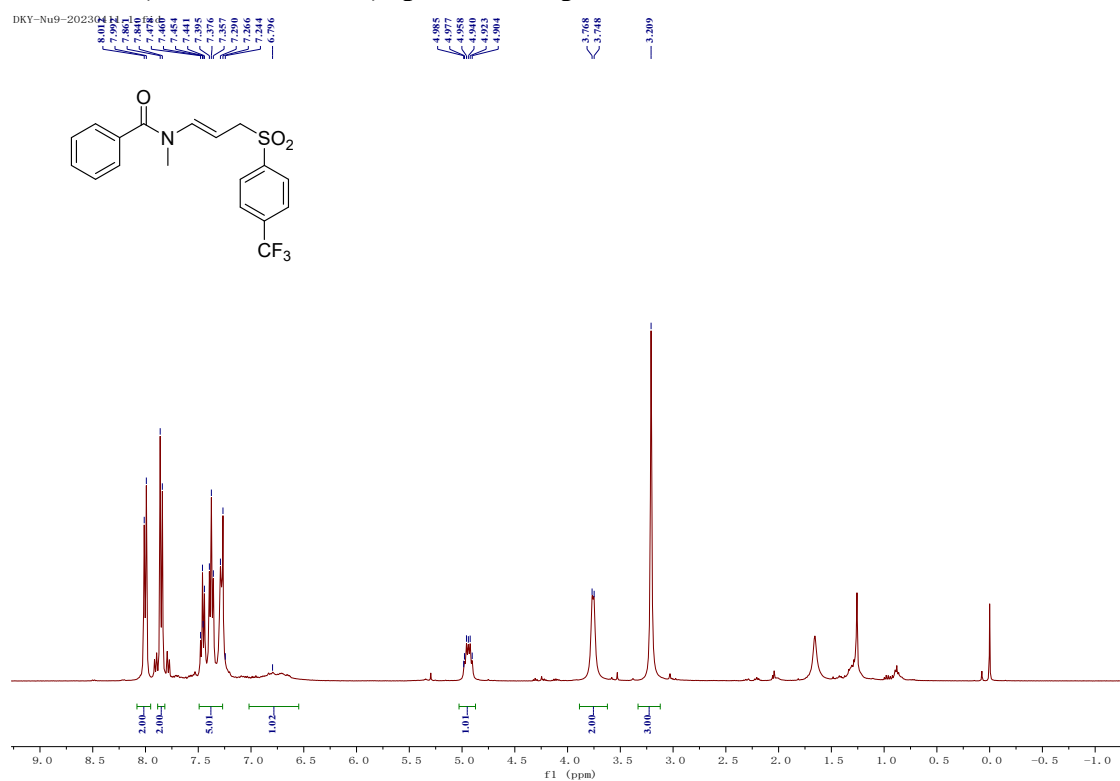

# <sup>19</sup>F NMR (376MHz, CDCl<sub>3</sub>) spectrum of product 19

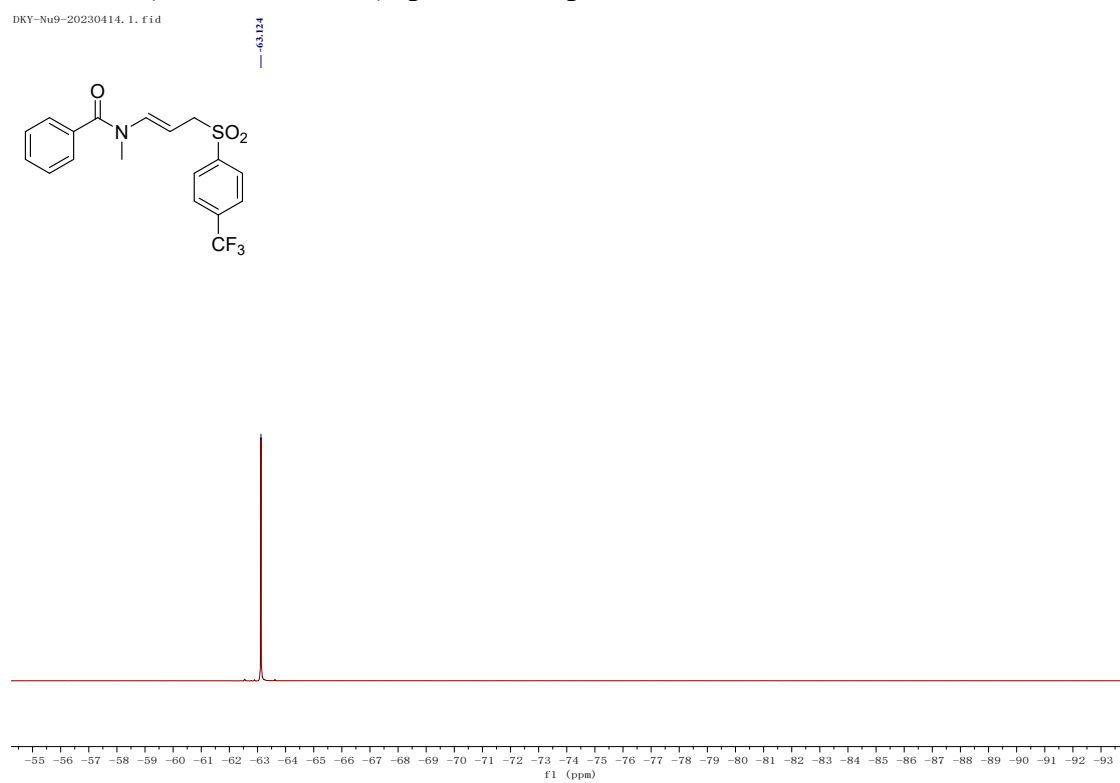

# <sup>13</sup>C NMR (400MHz, CDCl<sub>3</sub>) spectrum of product 19

DKY-Nu9-20230417. 1. f1d

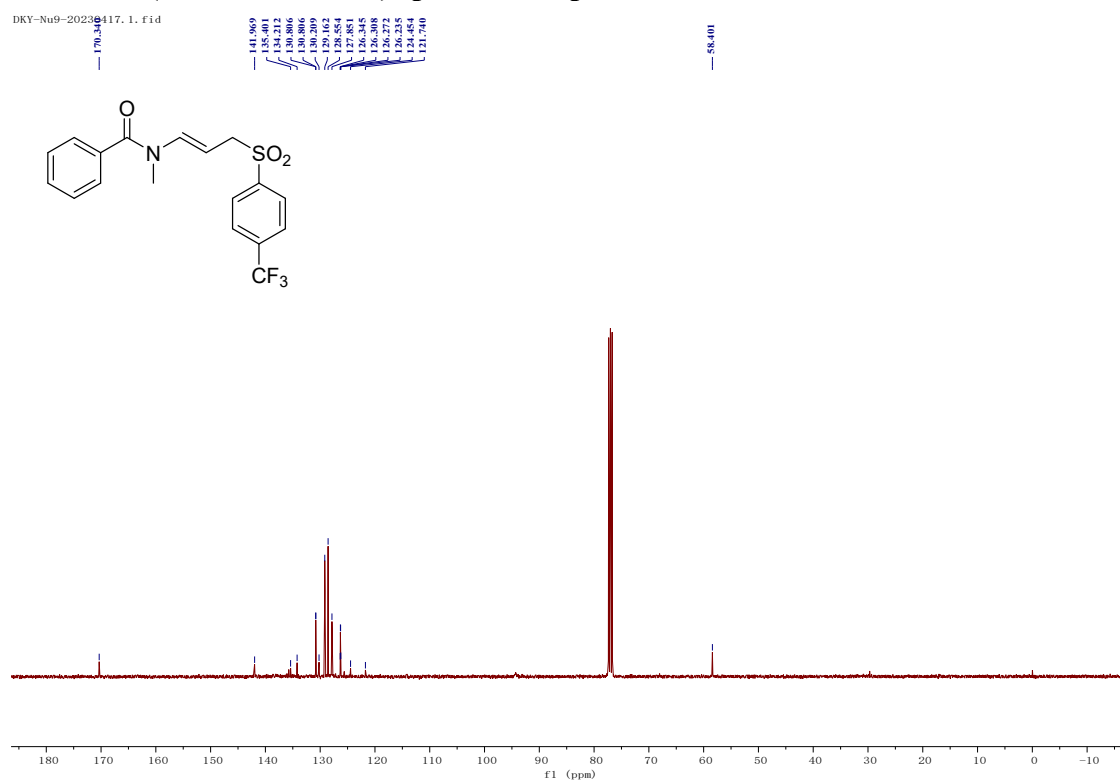

### <sup>1</sup>H NMR (400MHz, CDCl<sub>3</sub>) spectrum of product 20

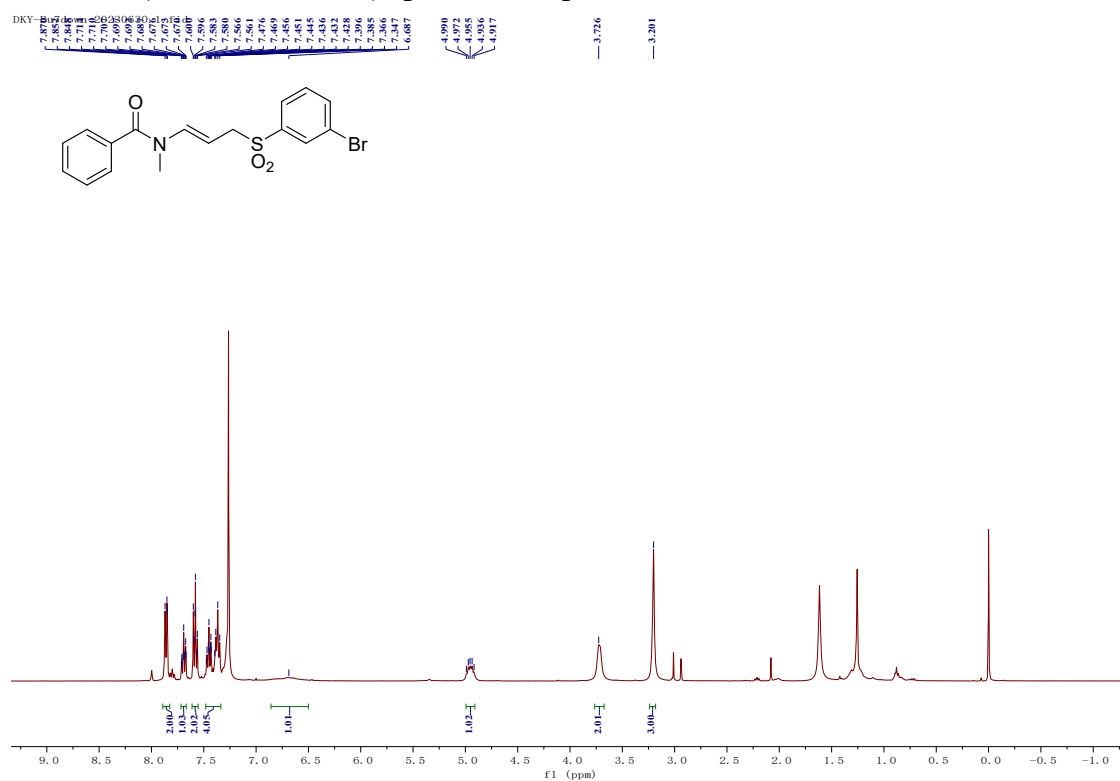

### <sup>13</sup>C NMR (400MHz, CDCl<sub>3</sub>) spectrum of product 20

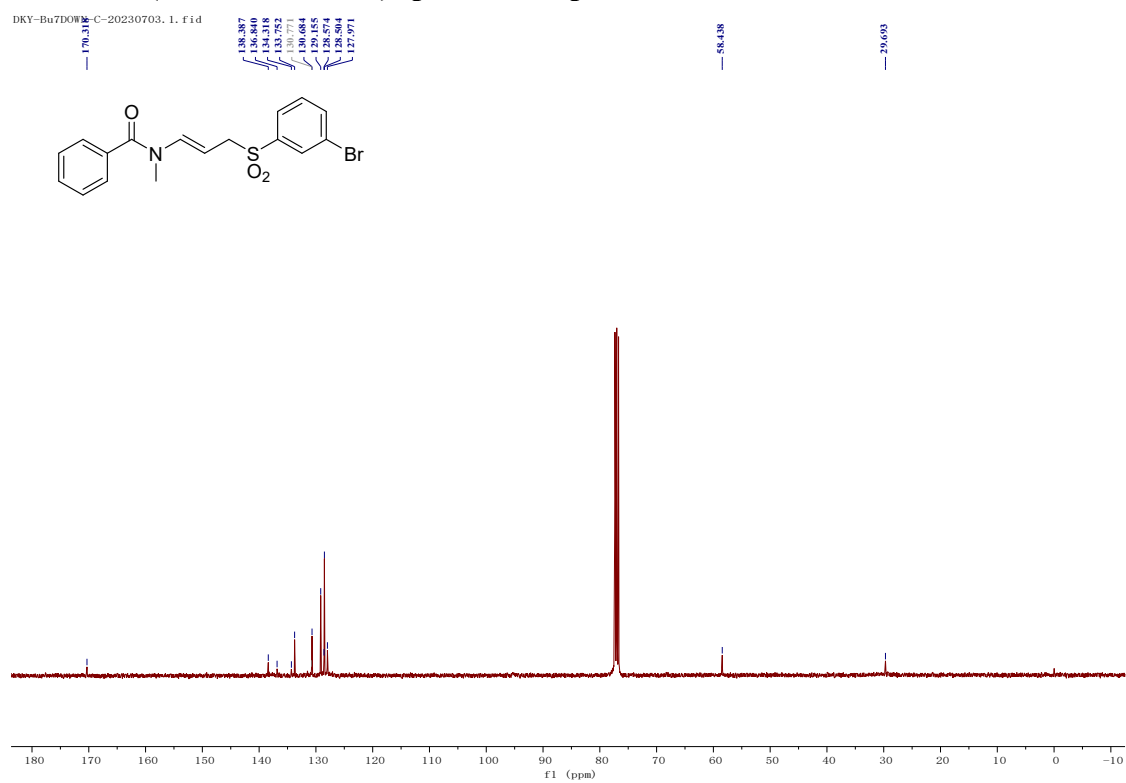

# <sup>1</sup>H NMR (400MHz, CDCl<sub>3</sub>) spectrum of product 21

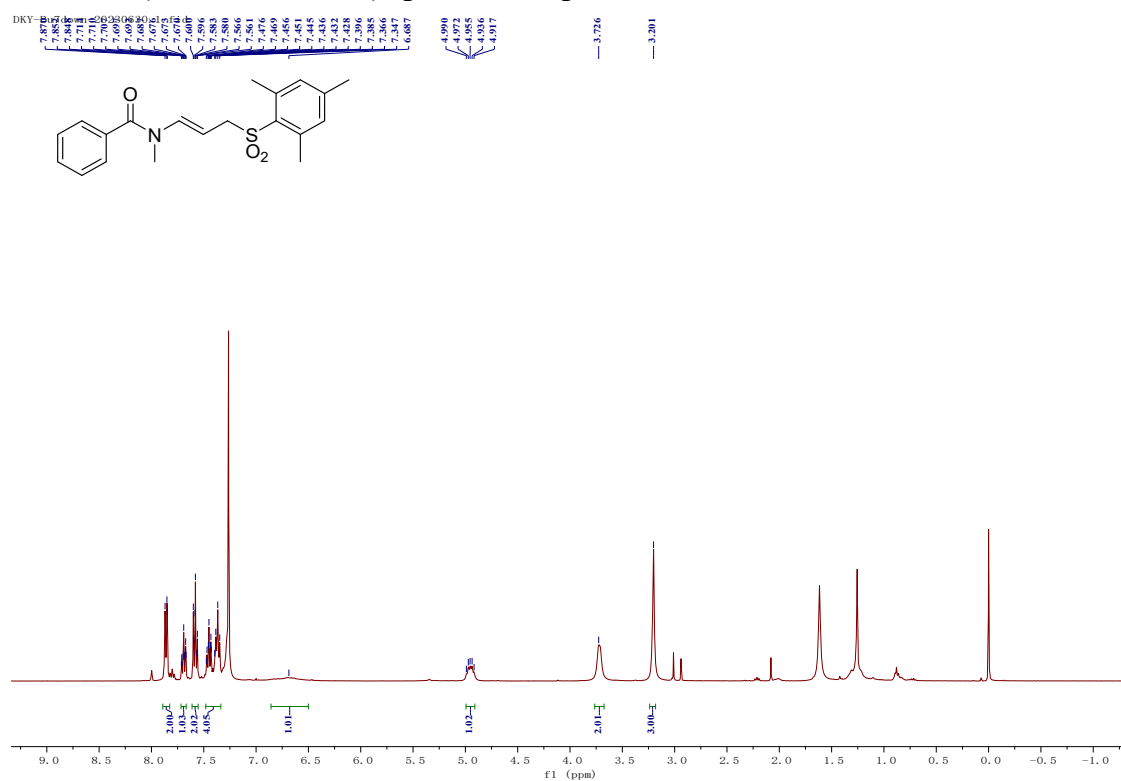

# <sup>13</sup>C NMR (400MHz, CDCl<sub>3</sub>) spectrum of product 21

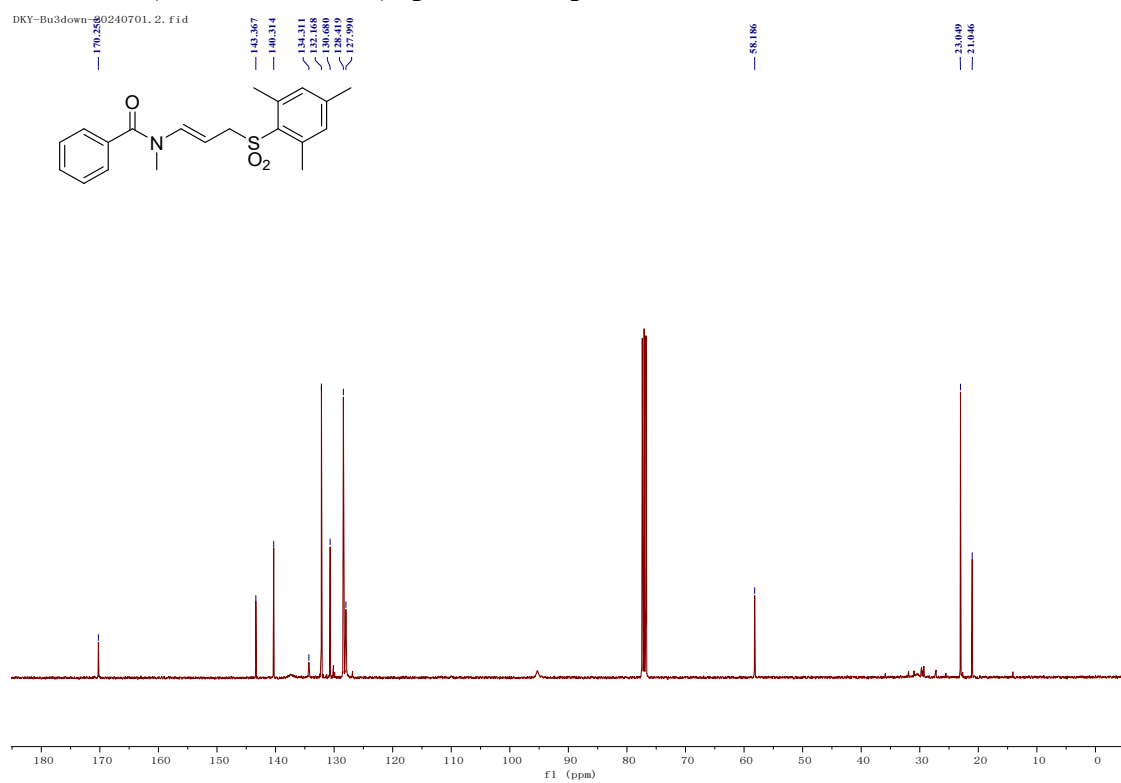

# <sup>1</sup>H NMR (400MHz, CDCl<sub>3</sub>) spectrum of product 22

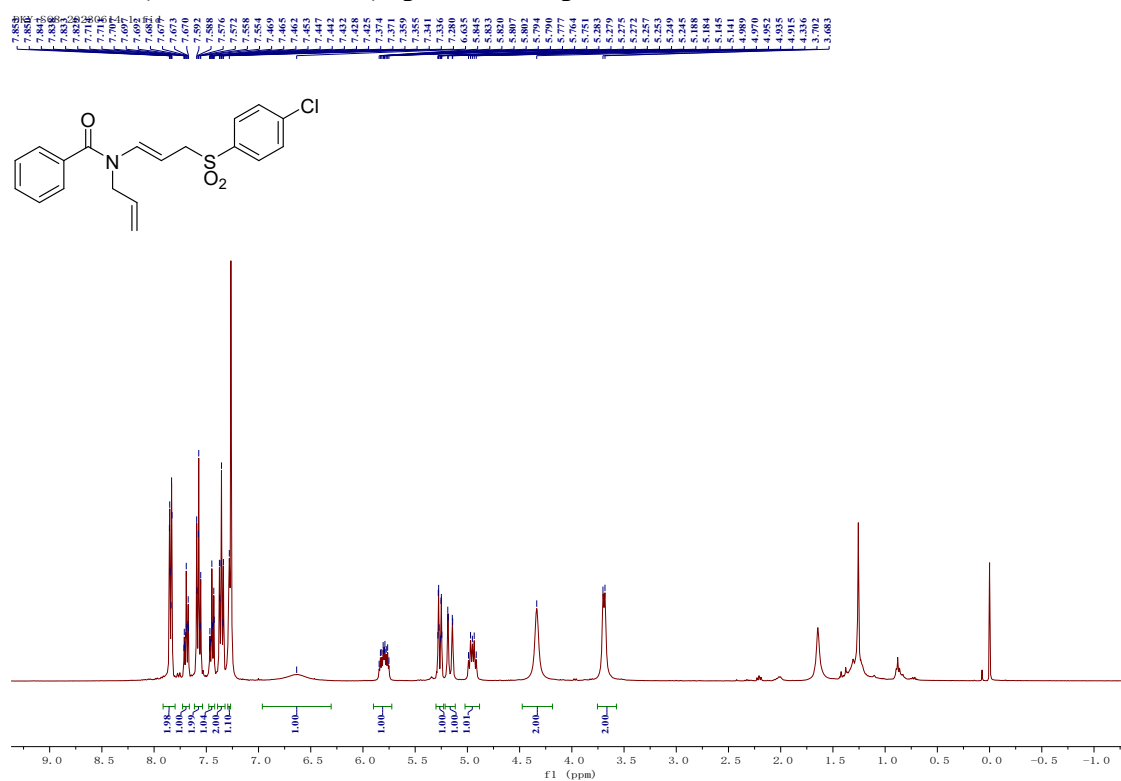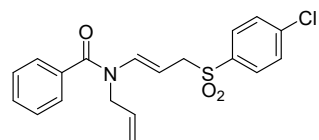

# <sup>13</sup>C NMR (400MHz, CDCl<sub>3</sub>) spectrum of product 22

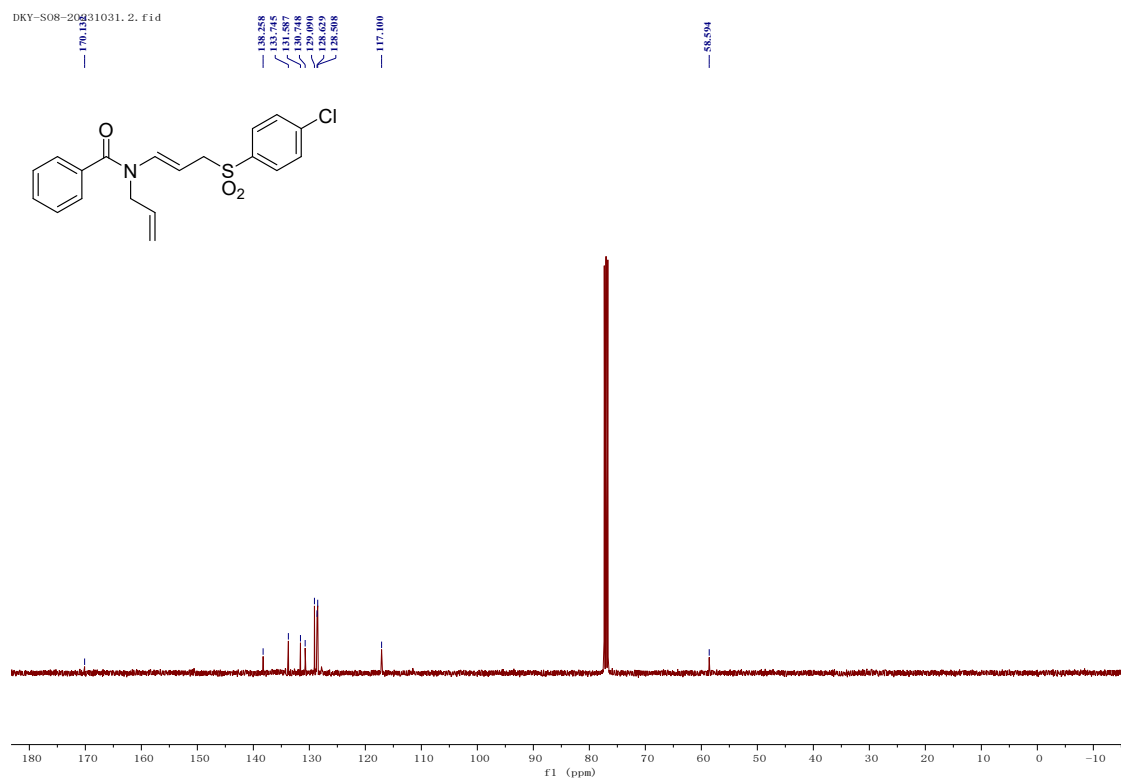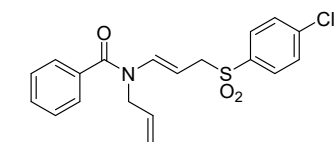



### <sup>1</sup>H NMR (400MHz, CDCl<sub>3</sub>) spectrum of product 23

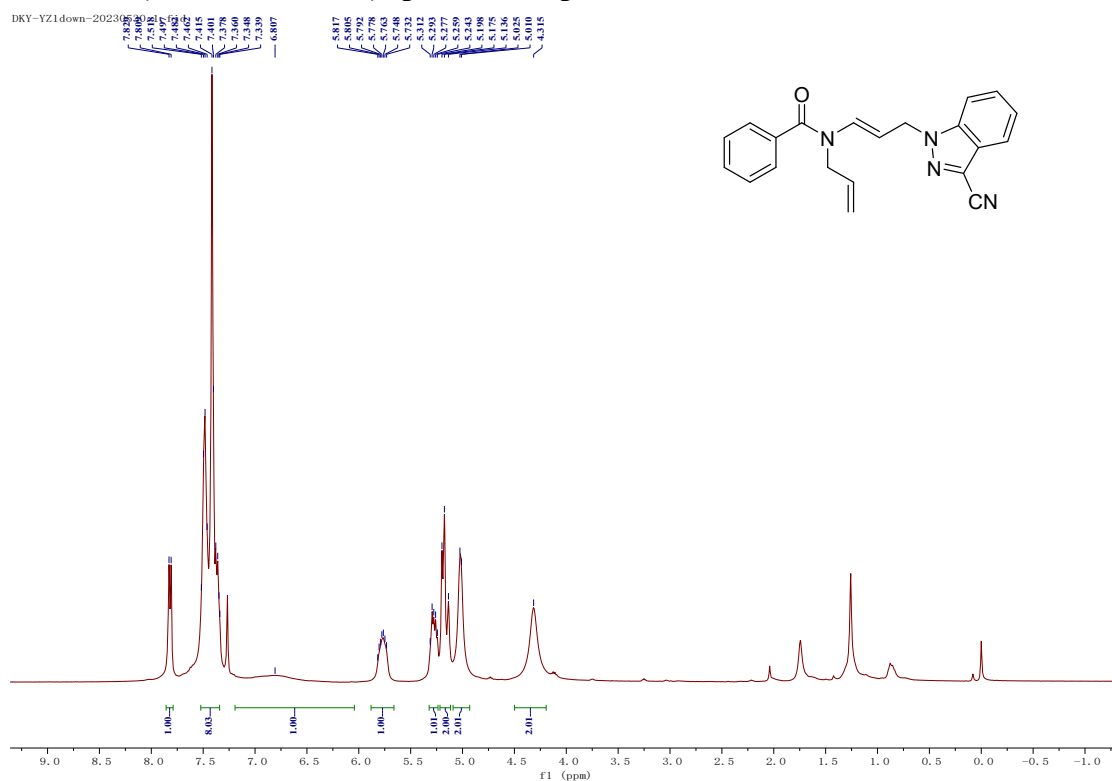

### <sup>13</sup>C NMR (400MHz, CDCl<sub>3</sub>) spectrum of product 23

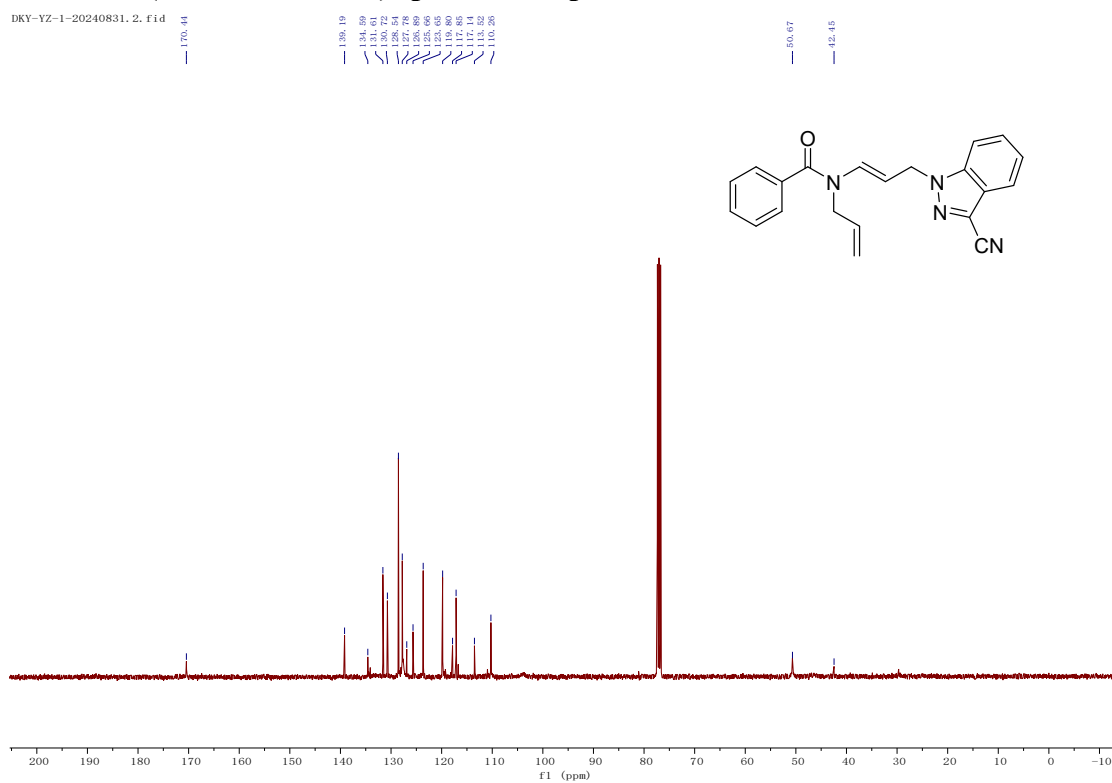

### <sup>1</sup>H NMR (400MHz, CDCl<sub>3</sub>) spectrum of product 24

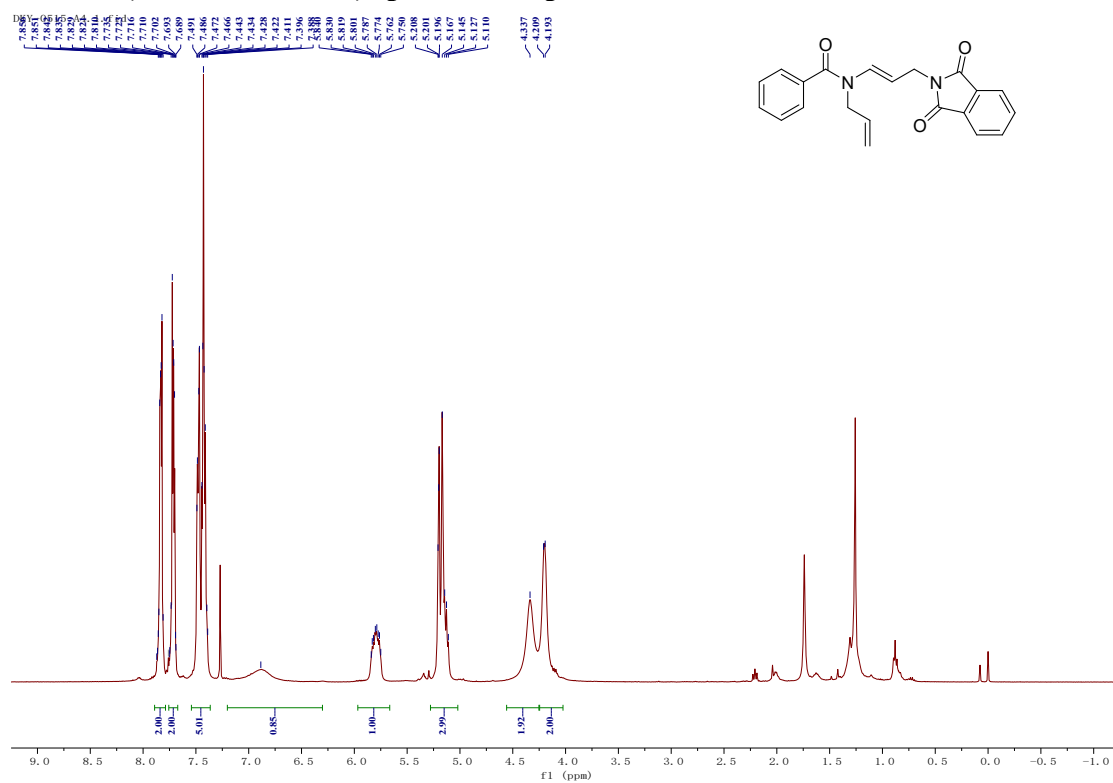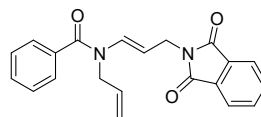

### <sup>13</sup>C NMR (400MHz, CDCl<sub>3</sub>) spectrum of product 24

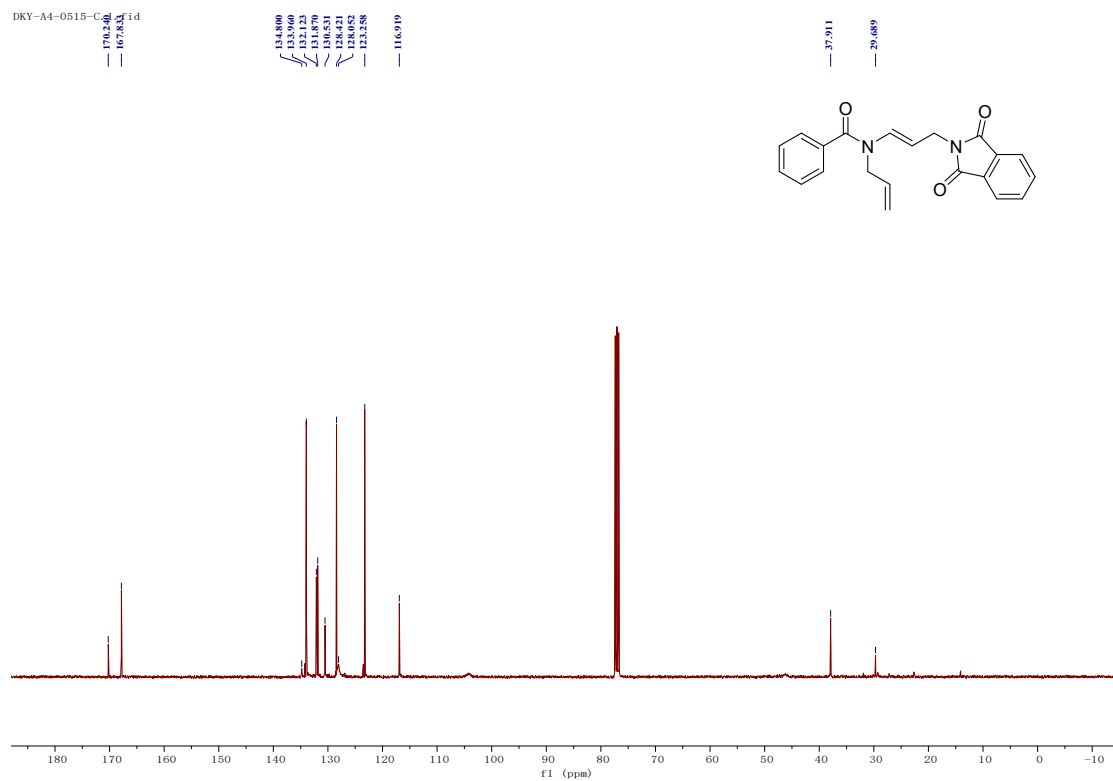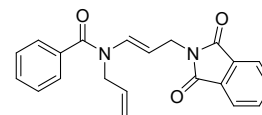

# <sup>1</sup>H NMR (400MHz, CDCl<sub>3</sub>) spectrum of product 3'

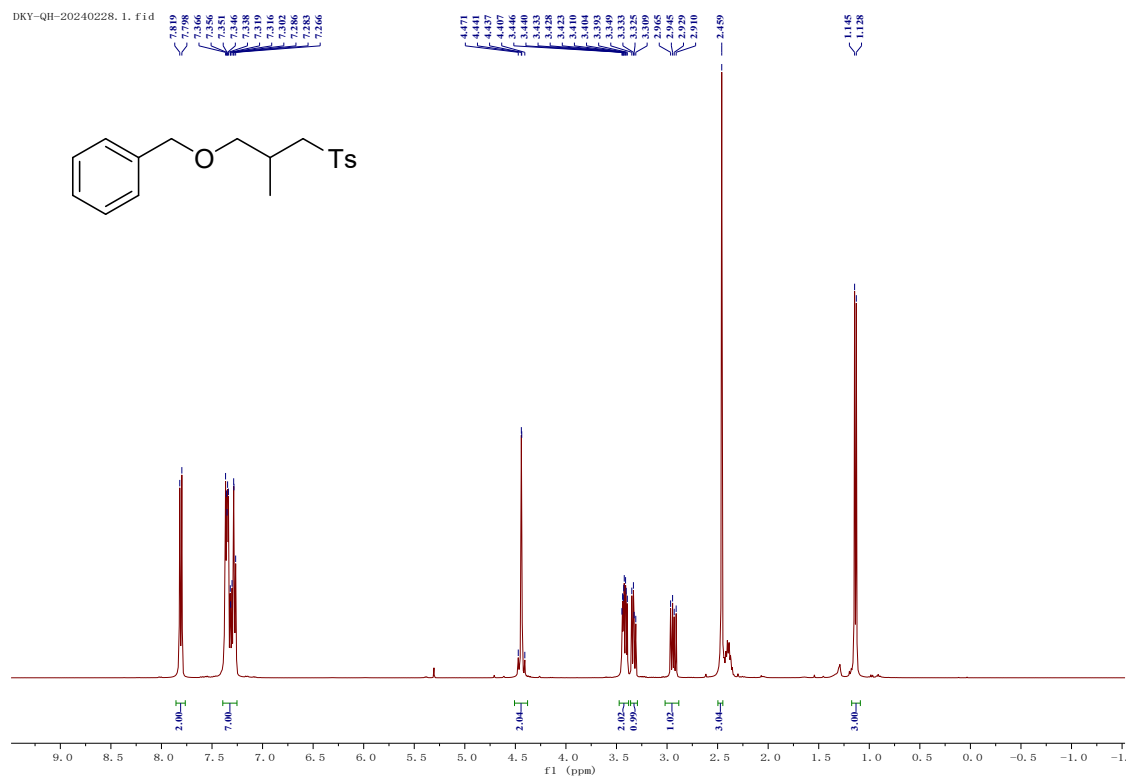

# <sup>13</sup>C NMR (400MHz, CDCl<sub>3</sub>) spectrum of product 3'

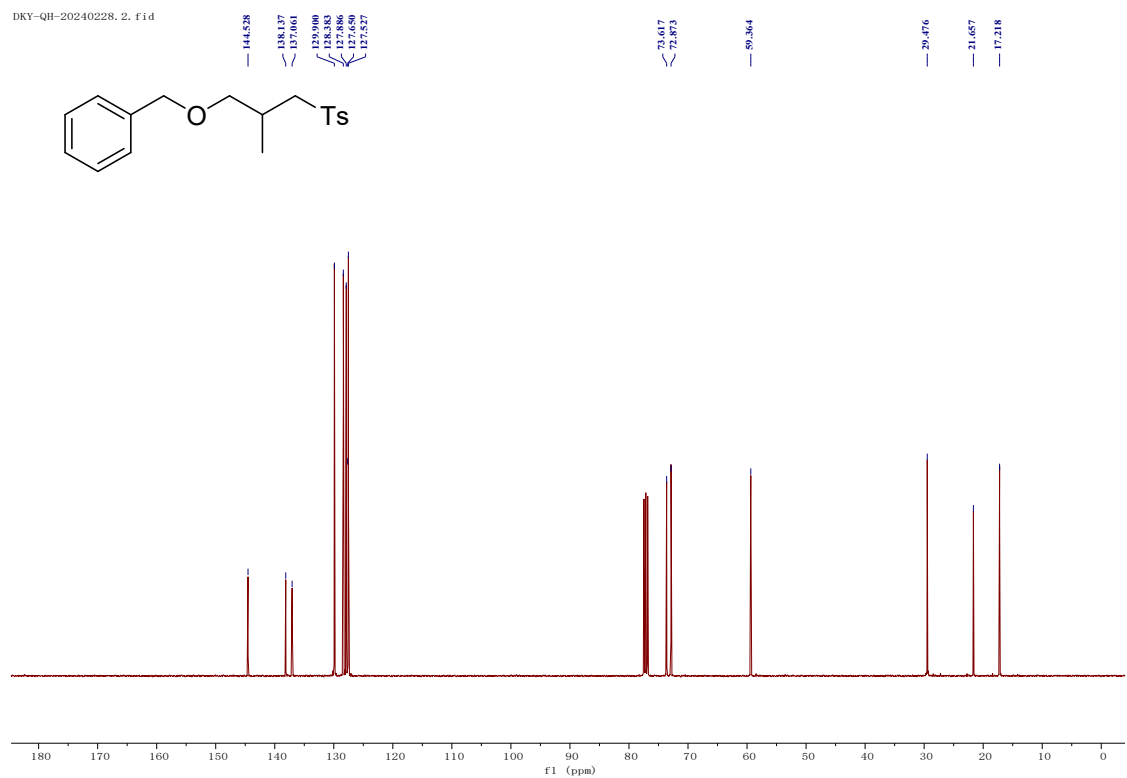

Supplement: d4cc03557g1.pdf [file d4cc03557g1.pdf]
